# Supplementary material for: Alkenylation and arylation of secondary alcohols enabled by productive merger of β-carbon and β-hydrogen elimination via an isodesmic reaction
Source: Royal Society of Chemistry journal article supplement (doi:10.1039/d4qo00482e), 2024-01-01

# Alkenylation and Arylation of Secondary Alcohols Enabled by Productive Merger of $\beta$ -Carbon and $\beta$ -Hydrogen Elimination via Isodesmic Reaction

Si-Qi Xiong, Zheng-Qiang Liu, Cheng Liang, Xue-Mei Huang, Xue Zhang, Qing-Hua Li,<sup>a,b,\*</sup> and Tang-Lin Liu<sup>a,\*</sup>

<sup>a</sup>School of Chemistry and Chemical Engineering, Southwest University, Chongqing, 400715, P. R. China.

<sup>b</sup>College of Life Sciences, Wuchang University of Technology, Wuhan, 430223, China.

E-mail: liuschop@swu.edu.cn; liqinghua@swu.edu.cn

## Table of Contents

|                                           |    |
|-------------------------------------------|----|
| I. General Information .....              | 2  |
| II. Reaction Optimization .....           | 3  |
| III. Experimental Procedures .....        | 8  |
| IV. Mechanism study .....                 | 9  |
| V. Characterization data of products..... | 11 |
| VI. References .....                      | 25 |
| VII. NMR spectra of the products .....    | 27 |

## I. General Information

<sup>1</sup>H and <sup>13</sup>C NMR spectra were recorded on a Bruker Avance 600 MHz and 400 MHz instruments. Chemical shifts were reported in parts per million (ppm), and the residual solvent peak was used as an internal reference: proton (chloroform  $\delta$  7.26), carbon (chloroform  $\delta$  77.0) or tetramethylsilane (TMS  $\delta$  0.00) was used as a reference. Multiplicity was indicated as follows: s (singlet), d (doublet), t (triplet), q (quartet), m (multiplet), dd (doublet of doublet), bs (broad singlet). Coupling constants were reported in Hertz (Hz). All high resolution mass spectra (HRMS) were obtained on a Bruker Apex-2. For thin layer chromatography (TLC), Qingdao Haiyang Chemical were used, and compounds were visualized with a UV light at 254 nm. Flash chromatography separations were performed on Qingdao Haiyang Chemical 300-400 mesh silica gel. All reactions were carried out under nitrogen atmosphere. All commercially available reagents were used as received for the reactions without any purification. Allylic alcohols<sup>1</sup> fluorenols<sup>2</sup>, their derivatives<sup>3</sup> and tertiary alcohols<sup>4</sup> are synthesis via the known procedures.

## II. Reaction Optimization

### 2.1. Optimization of $\alpha$ -C-H alkenylation

**Table S1 Initial catalyst and ligand screening of the reaction 1a and 2a**

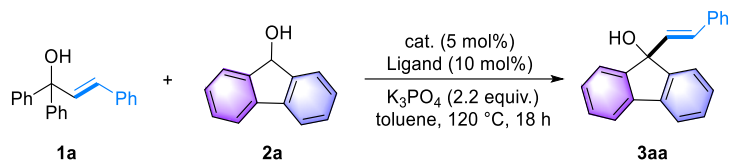

| Entry | cat.                                                              | Ligand           | Yield (%) |
|-------|-------------------------------------------------------------------|------------------|-----------|
| 1     | Rh(CO)PMe <sub>3</sub>                                            | DCyPF            | -         |
| 2     | [RuCp*Cl <sub>2</sub> ] <sub>2</sub>                              | DCyPF            | -         |
| 3     | Pd(OAc) <sub>2</sub>                                              | DCyPF            | -         |
| 4     | [IrCp*Cl <sub>2</sub> ] <sub>2</sub>                              | DCyPF            | -         |
| 5     | [Rh(C <sub>2</sub> H <sub>4</sub> ) <sub>2</sub> Cl] <sub>2</sub> | DCyPF            | 26        |
| 6     | [Rh(COD) <sub>2</sub> ]BF <sub>4</sub>                            | DCyPF            | 14        |
| 7     | [Rh(COD)Cl] <sub>2</sub>                                          | IMes·HCl         | 13        |
| 8     | [Rh(COD)Cl] <sub>2</sub>                                          | IPr·HCl          | 15        |
| 9     | [Rh(COD)Cl] <sub>2</sub>                                          | PCy <sub>3</sub> | 17        |
| 10    | [Rh(COD)Cl] <sub>2</sub>                                          | DPPF             | 37        |
| 11    | [Rh(COD)Cl] <sub>2</sub>                                          | BINAP            | 41        |
| 12    | [Rh(COD)Cl] <sub>2</sub>                                          | DCyPE            | trace     |
| 13    | [Rh(COD)Cl] <sub>2</sub>                                          | MePhos           | trace     |
| 14    | [Rh(COD)Cl] <sub>2</sub>                                          | XantPhos         | trace     |
| 15    | [Rh(COD)Cl] <sub>2</sub>                                          | DCyPF            | 56        |

Reaction conditions: 0.2 mmol of **1a**, 0.1 mmol of **2a**, 5 mol % of cat., 0.01 mmol of ligand, 0.22 mmol of  $K_3PO_4$  in 0.5 mL toluene at 120 °C (oil bath) for 18 h.

**Table S2 Base screening of the reaction 1a and 2a**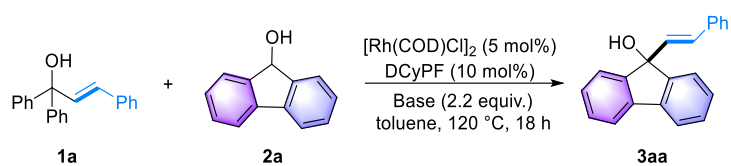

| Entry          | Base <sup>a</sup>                | Yield (%) |
|----------------|----------------------------------|-----------|
| 1              | K <sub>3</sub> PO <sub>4</sub>   | 56        |
| 2 <sup>b</sup> | K <sub>3</sub> PO <sub>4</sub>   | 34        |
| 3 <sup>c</sup> | K <sub>3</sub> PO <sub>4</sub>   | 54        |
| 4 <sup>d</sup> | K <sub>3</sub> PO <sub>4</sub>   | 54        |
| 5              | K <sub>2</sub> CO <sub>3</sub>   | 51        |
| 6              | Cs <sub>2</sub> CO <sub>3</sub>  | 63        |
| 7              | NaOH                             | trace     |
| 8              | CsF                              | 30        |
| 9              | NaH                              | -         |
| 10             | DBU                              | -         |
| 11             | NaH <sub>2</sub> PO <sub>4</sub> | -         |

Reaction conditions: 0.2 mmol of **1a**, 0.1 mmol of **2a**, 5 mol % of [Rh(COD)Cl]<sub>2</sub>, 0.01 mmol of DCyPF, 0.3 mmol of base in 0.5 mL toluene at 120 °C (oil bath) for 18 h. <sup>b</sup>0.25 mmol of K<sub>3</sub>PO<sub>4</sub>. <sup>c</sup>0.35 mmol of K<sub>3</sub>PO<sub>4</sub> <sup>d</sup>0.40 mmol of K<sub>3</sub>PO<sub>4</sub>.

**Table S3 Solvent screening of the reaction 1a and 2a**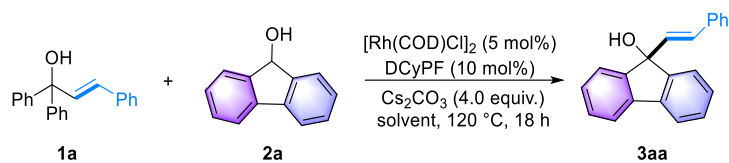

| Entry           | solvent <sup>d</sup>   | Yield (%) |
|-----------------|------------------------|-----------|
| 1               | toluene                | 60        |
| 2 <sup>b</sup>  | toluene                | 63        |
| 3 <sup>c</sup>  | toluene                | 47        |
| 4               | $\text{CH}_3\text{CN}$ | -         |
| 5               | <i>p</i> -Xylene       | 57        |
| 6               | <i>o</i> -Xylene       | 63        |
| 7               | THF                    | 64        |
| 8               | 2-MeTHF                | 67        |
| 9               | EtOH                   | -         |
| 10              | PhCl                   | 70        |
| 11              | DMF                    | -         |
| 12              | TBME                   | 67        |
| 13              | CPME                   | 63        |
| 14              | 1,4-Dioxane            | 71        |
| 15 <sup>d</sup> | 1,4-Dioxane            | 82        |

<sup>a</sup>Reaction conditions: 0.2 mmol of **1a**, 0.1 mmol of **2a**, 5 mol % of  $[\text{Rh}(\text{COD})\text{Cl}]_2$ , 0.01 mmol of DCyPF, 0.4 mmol of  $\text{Cs}_2\text{CO}_3$  in 0.5 mL toluene at 120 °C (oil bath) for 18 h. <sup>b</sup>0.5 mL of toluene. <sup>c</sup>0.2 mL of toluene. <sup>d</sup>0.3 mmol of **1a**, 0.1 mmol of **2a**

## 1.2. Optimization of $\alpha$ -C-H arylation

**Table S4 Ligand screening of the reaction 4a and 5a**

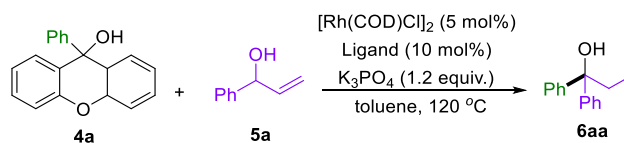

| Entry | Ligand                 | Yield (%) |
|-------|------------------------|-----------|
| 1     | DCyPF                  | -         |
| 2     | DCyPE                  | -         |
| 3     | $P(Ar^F)_3$            | -         |
| 4     | 1,2-Dimethylimidazole  | -         |
| 5     | 2-Aminobenzimidazole   | -         |
| 6     | SIMes·HCl              | 21        |
| 7     | IMes·HCl               | 28        |
| 8     | IPr·HCl                | 25        |
| 9     | SIMes·HCl              | 21        |
| 10    | SIMes·HBF <sub>4</sub> | 23        |

Reaction conditions: 0.1 mmol of **4a**, 0.1 mmol of **5a**, 5 mol % of  $[Rh(COD)Cl]_2$ , 0.01 mmol of IMes·HCl, 0.12 mmol of  $K_3PO_4$ , 40 mg of 4Å MS in 0.5 mL *o*-xylene at 120 °C (oil bath) for 12 h.

**Table S5 Catalyst screening of the reaction 4a and 5a**

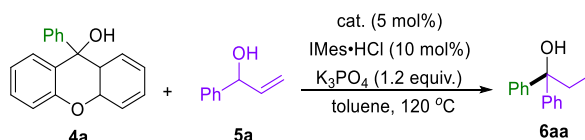

| Entry | cat.                 | Yield (%) |
|-------|----------------------|-----------|
| 1     | $[RuCp^*Cl_2]_2$     | -         |
| 2     | $Pd(OAc)_2$          | -         |
| 3     | $Ni(OTf)_2$          | -         |
| 4     | $[IrCp^*Cl_2]_2$     | -         |
| 5     | $[Rh(C_2H_4)_2Cl]_2$ | 16        |
| 6     | $[Rh(COE)_2Cl]_2$    | 14        |
| 7     | $[Rh(OMe)(COD)]_2$   | 16        |
| 8     | $[Rh(COD)_2BF_4]$    | trace     |
| 9     | $[Rh(COD)Cl]_2$      | 28        |

Reaction conditions: 0.1 mmol of **4a**, 0.1 mmol of **5a**, 5 mol % of *cat.*, 0.01 mmol of IMes·HCl, 0.12 mmol of  $K_3PO_4$  in 0.5 mL toluene at 110 °C (oil bath) for 12 h.

**Table S6 Base screening of the reaction 4a and 5a**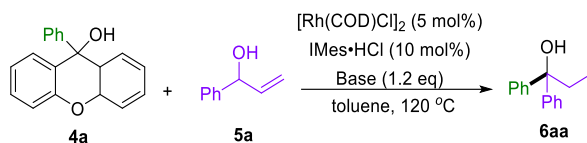

| Entry | Base                             | Yield (%) |
|-------|----------------------------------|-----------|
| 1     | KO <sup>t</sup> Bu               | 24        |
| 2     | KO <sup>t</sup> Amyl             | 17        |
| 3     | LiO <sup>t</sup> Bu              | 18        |
| 4     | Cs <sub>2</sub> CO <sub>3</sub>  | 27        |
| 5     | K <sub>2</sub> CO <sub>3</sub>   | -         |
| 6     | NaOH                             | 20        |
| 7     | KHDMS                            | 14        |
| 8     | NaH                              | 10        |
| 9     | KF                               | -         |
| 10    | DBU                              | -         |
| 11    | CsF                              | trace     |
| 12    | NaH <sub>2</sub> PO <sub>4</sub> | trace     |

Reaction conditions: 0.1 mmol of **4**, 0.1 mmol of **5a**, 5 mol % of [Rh(COD)Cl]<sub>2</sub>, 0.01 mmol of IMes·HCl, 0.12 mmol of K<sub>3</sub>PO<sub>4</sub>, 40 mg of 4Å MS in 0.5 mL *o*-xylene at 120 °C (oil bath) for 12 h.

**Table S7 Solvent screening of the reaction 4a and 5a**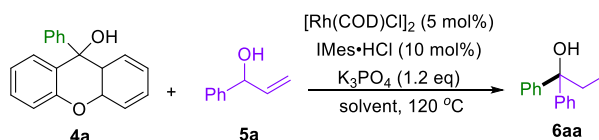

| Entry          | Solvent <sup>a</sup> | Yield (%) |
|----------------|----------------------|-----------|
| 1              | THF                  | -         |
| 2              | DCE                  | -         |
| 3              | <i>o</i> -xylene     | 40        |
| 4 <sup>b</sup> | <i>o</i> -xylene     | 50        |
| 5 <sup>c</sup> | <i>o</i> -xylene     | 60        |

<sup>a</sup>Reaction conditions: 0.1 mmol of **4**, 0.1 mmol of **5a**, 5 mol % of [Rh(COD)Cl]<sub>2</sub>, 0.01 mmol of IMes·HCl, 0.12 mmol of K<sub>3</sub>PO<sub>4</sub>, 40 mg of 4Å MS in 0.5 mL *o*-xylene at 130 °C (oil bath) for 12 h. <sup>b</sup>130 °C for 20 h <sup>c</sup>40 mg of 4Å MS.

**Table S8 The substrates screening of the reaction 4 and 5a**

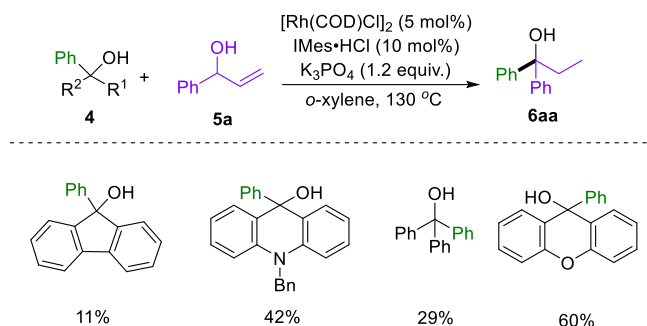

Reaction conditions: 0.1 mmol of **4**, 0.1 mmol of **5a**, 5 mol % of [Rh(COD)Cl]<sub>2</sub>, 0.01 mmol of IMes·HCl, 0.12 mmol of K<sub>3</sub>PO<sub>4</sub>, 40 mg of 4Å MS in 0.5 mL *o*-xylene at 130 °C (oil bath) for 20 h.

### III. Experimental Procedures

#### Scheme S1 Rh-catalyzed alkenylation of secondary alcohols

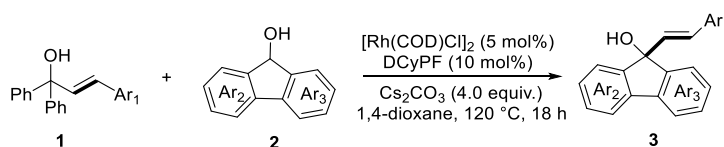

**General Procedures A:** All reactions in this section were performed at 0.1 mmol scale. In a nitrogen glove box, an oven-dried 10 mL reaction tube equipped with a magnetic stirring bar was charged with [Rh(COD)Cl]<sub>2</sub> (5 mol%), DCyPF (10 mol%) and 1,4-dioxane (0.3 mL). The resulting mixtures were stirred for 5 to 10 min before **1** (0.3 mmol), **2** (0.1 mmol) and the Cs<sub>2</sub>CO<sub>3</sub> (4.0 equiv.) were added. The reaction mixture was sealed with a screw cap, taken out of the glove box and placed in oil-bath at 120 °C and stirred for 18 h. After cooling to room temperature, the reaction mixture was exposed to air, concentrated and further purified by flash column chromatography over silica (petroleum/ethyl acetate) to give the product.

#### Scheme S2 Rh-catalyzed arylation of secondary allylic alcohols

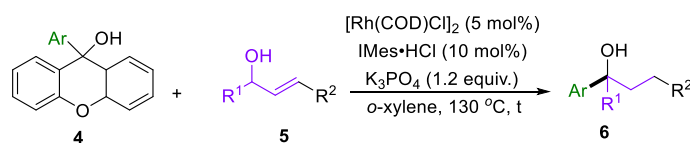

**General Procedures B:** All reactions in this section were performed at 0.1 mmol scale. To a vacuum reaction tube equipped with a dried stir bar was added **4** (0.1 mmol), **5** (0.1 mmol), Rh(COD)Cl<sub>2</sub> (5



mol%), IMes·HCl (10 mol%) and K<sub>3</sub>PO<sub>4</sub> (1.2 equiv.) and *o*-xylene in the glovebox. The reaction mixture was sealed with a screw cap, taken out of the glove box and placed in oil-bath at 130 °C and stirred for corresponding time. After cooling to room temperature, the reaction mixture was exposed to air, concentrated and further purified by flash column chromatography over silica (petroleum/ethyl acetate) to give the product.

### Gram-Scale Reaction C:

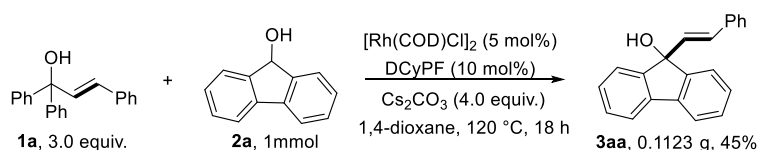

In a nitrogen glove box, an oven-dried 50 mL reaction tube equipped with a magnetic stirring bar was charged with [Rh(COD)Cl]<sub>2</sub> (5 mol%), DCyPF (10 mol%) and 1,4-dioxane (3.0 mL). The resulting mixtures were stirred for 5 to 10 min before **1** (3 mmol), **2** (1 mmol) and the Cs<sub>2</sub>CO<sub>3</sub> (4.0 equiv.) were added. The reaction mixture was sealed with a screw cap, taken out of the glove box and placed in oil-bath at 120 °C and stirred for 18 h. After cooling to room temperature, the reaction mixture was exposed to air, concentrated and further purified by flash column chromatography over silica (petroleum/ethyl acetate) to give the product in 45% yield.

## IV. Mechanism study

### Scheme S3. Radical experiments

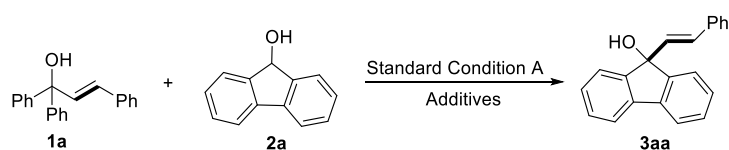

| Entry | Additive | Yield |
|-------|----------|-------|
| 1     | TEMPO    | 42%   |
| 2     | BHT      | 68%   |

Reaction conditions: 0.3 mmol of **1a**, 0.1 mmol of **2a**, 5 mol % of [Rh(COD)Cl]<sub>2</sub>, 0.01 mmol of DCyPF, 0.4 mmol of Cs<sub>2</sub>CO<sub>3</sub> in 0.3 mL toluene at 120 °C (oil bath) for 18 h.

In a nitrogen glove box, an oven-dried 10 mL reaction tube equipped with a magnetic stirring bar was charged with [Rh(COD)Cl]<sub>2</sub> (5 mol%), DCyPF (10 mol%) and toluene (0.3 mL). The resulting

mixtures were stirred for 5 to 10 min before **1a** (0.3 mmol), **2a** (0.10 mmol), additives (0.1 mmol) and Cs<sub>2</sub>CO<sub>3</sub> (4.0 equiv.) were added. The reaction mixture was sealed with a screw cap, taken out of the glove box and placed in oil-bath at 120 °C and stirred for 18 h. After cooling to room temperature, the reaction mixture was exposed to air, concentrated and further purified by flash column chromatography over silica (petroleum/ethyl acetate) to give desired product **3aa**.

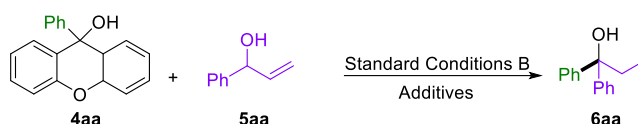

| Entry | Additive | Yeild |
|-------|----------|-------|
| 1     | TEMPO    | 22%   |
| 2     | BHT      | 27%   |

To a vacuum reaction tube equipped with a dried stir bar was added **4** (0.1 mmol), **5** (0.1 mmol), Rh(COD)Cl<sub>2</sub> (5 mol%), IMes·HCl (10 mol%), additives (0.1 mmol) and K<sub>3</sub>PO<sub>4</sub> (1.2 equiv.) and *o*-xylene (0.5 mL) in the glovebox. The reaction mixture was sealed with a screw cap, taken out of the glove box and placed in oil-bath at 130 °C and stirred for corresponding time. After cooling to room temperature, the reaction mixture was exposed to air, concentrated and further purified by flash column chromatography over silica (petroleum/ethyl acetate) to give the product **6aa**.

#### Scheme S4. Isotope labeling experiments

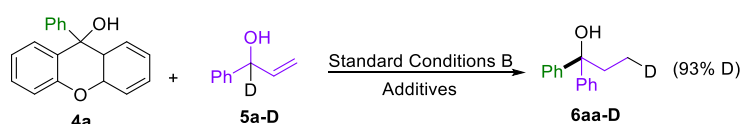

To a vacuum reaction tube equipped with a dried stir bar was added **4a** (0.1 mmol), **5a-D** (0.1 mmol), Rh(COD)Cl<sub>2</sub> (5 mol%), IMes·HCl (10 mol%) and K<sub>3</sub>PO<sub>4</sub> (1.2 equiv.) and *o*-xylene (0.5 mL) in the glovebox. The reaction mixture was sealed with a screw cap, taken out of the glove box and placed in oil-bath at 130 °C and stirred for corresponding time. After cooling to room temperature, the reaction mixture was exposed to air, concentrated and further purified by flash column chromatography over silica (petroleum/ethyl acetate) to give the product **6aa-D** in 52% yield, with 93% deuterated.

XSQ-1H-58.fid  
XSQ-525C-1

7.421  
7.419  
7.407  
7.317  
7.304  
7.292  
7.255  
7.227  
7.215  
7.203

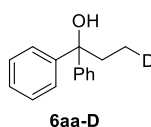

2.328  
2.316  
2.303  
2.064

0.895  
0.882  
0.869

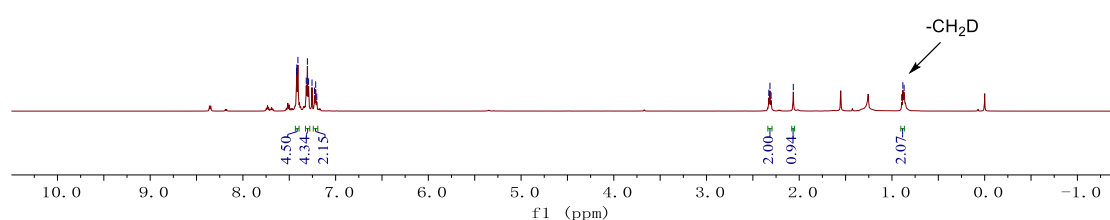

## V. Characterization data of products

### (*E*)-9-Styryl-9H-fluoren-9-ol (3aa)<sup>5</sup>

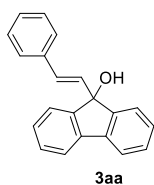

The title compound was prepared according to the general procedure as described.

Silica gel flash column chromatography was performed using hexanes and ethyl acetate (10:1) resulting in 83% yield (23.4 mg) as a colorless oil.

<sup>1</sup>H NMR (600 MHz, CDCl<sub>3</sub>) δ 7.66 (d, *J* = 7.8 Hz, 2H), 7.51 (d, *J* = 7.8 Hz, 2H), 7.42-7.35 (m, 4H), 7.31 (t, *J* = 7.2 Hz, 2H), 7.29-7.24 (m, 2H), 7.20 (t, *J* = 7.8 Hz, 1H), 6.94 (d, *J* = 16.2 Hz, 1H), 6.31 (d, *J* = 16.2 Hz, 1H), 2.27 (s, 1H).

<sup>13</sup>C NMR (151 MHz, CDCl<sub>3</sub>) δ 148.39, 139.60, 136.92, 130.71, 129.43, 128.65, 128.54, 128.40, 127.70, 126.76, 124.76, 120.36, 82.51.

### (*E*)-9-(4-Methylstyryl)-9H-fluoren-9-ol (3ba)<sup>5</sup>

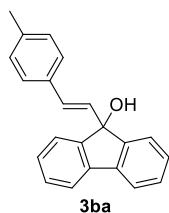

The title compound was prepared according to the general procedure as described.

Silica gel flash column chromatography was performed using hexanes and ethyl acetate (10:1) resulting in 80% yield (23.9 mg) as a colorless oil.

$^1\text{H NMR}$  (600 MHz,  $\text{CDCl}_3$ )  $\delta$  7.65 (d,  $J = 7.8$  Hz, 2H), 7.50 (d,  $J = 7.2$  Hz, 2H), 7.38 (t,  $J = 7.8$  Hz, 2H), 7.30 (t,  $J = 7.2$  Hz, 2H), 7.25 (d,  $J = 7.8$  Hz, 2H), 7.08 (d,  $J = 7.8$  Hz, 2H), 6.89 (d,  $J = 15.8$  Hz, 1H), 6.27 (d,  $J = 15.8$  Hz, 1H), 2.30 (s, 3H), 1.56 (s, 1H).

$^{13}\text{C NMR}$  (151 MHz,  $\text{CDCl}_3$ )  $\delta$  148.50, 139.58, 137.53, 134.12, 129.65, 129.36, 129.34, 128.43, 128.36, 126.66, 124.76, 120.33, 82.52, 21.29.

#### **(E)-9-(4-Ethoxystyryl)-9H-fluoren-9-ol (3ca)**

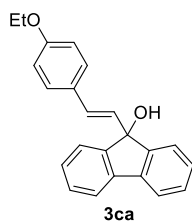

The title compound was prepared according to the general procedure as described.

Silica gel flash column chromatography was performed using hexanes and ethyl acetate (5:1) resulting in 84% yield (27.6 mg) as a colorless oil.

$^1\text{H NMR}$  (600 MHz,  $\text{CDCl}_3$ )  $\delta$  7.65 (d,  $J = 7.8$  Hz, 2H), 7.51 (d,  $J = 7.2$  Hz, 2H), 7.38 (t,  $J = 7.2$  Hz, 2H), 7.32-7.27 (m, 4H), 6.84 (d,  $J = 15.6$  Hz, 1H), 6.79 (d,  $J = 8.4$  Hz, 2H), 6.20 (d,  $J = 15.6$  Hz, 1H), 4.00 (q,  $J = 7.2$  Hz, 2H), 2.28 (s, 1H), 1.38 (t,  $J = 7.2$  Hz, 3H).

$^{13}\text{C NMR}$  (151 MHz,  $\text{CDCl}_3$ )  $\delta$  158.73, 148.58, 139.55, 129.52, 129.32, 128.35, 128.07, 127.91, 124.75, 120.32, 114.66, 82.53, 63.60, 14.93.

HRMS (ESI):  $\text{C}_{23}\text{H}_{20}\text{O}_2\text{Na}$   $[\text{M}+\text{Na}]^+$ , calculated 351.1356, found: 351.1356.

#### **(E)-9-(4-(Methylthio)styryl)-9H-fluoren-9-ol (3da)**

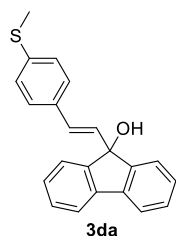

The title compound was prepared according to the general procedure as described.

Silica gel flash column chromatography was performed using hexanes and ethyl acetate (10:1) resulting in 43% yield (14.2 mg) as a colorless oil.

$^1\text{H NMR}$  (600 MHz,  $\text{CDCl}_3$ )  $\delta$  7.66 (d,  $J = 7.8$  Hz, 2H), 7.51 (d,  $J = 7.8$  Hz, 2H), 7.39 (t,  $J = 7.8$  Hz, 2H), 7.32-7.27 (m, 4H), 7.16 (d,  $J = 7.8$  Hz, 2H), 6.88 (d,  $J = 15.8$  Hz, 1H), 6.28 (d,  $J = 15.8$  Hz, 1H), 2.45 (s, 3H), 2.26 (s, 1H).

$^{13}\text{C NMR}$  (151 MHz,  $\text{CDCl}_3$ )  $\delta$  148.69, 139.70, 131.20, 129.29, 128.73, 128.36, 127.25, 125.99, 124.82, 123.45, 120.72, 120.30, 82.76, 55.63.

HRMS (ESI):  $\text{C}_{22}\text{H}_{18}\text{SONa}$   $[\text{M}+\text{Na}]^+$ , calculated: 353.0971, found: 353.0972.

**(E)-9-(2-([1,1'-Biphenyl]-4-yl)vinyl)-9H-fluoren-9-ol (3ea)<sup>5</sup>**

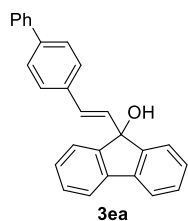

The title compound was prepared according to the general procedure as described.

Silica gel flash column chromatography was performed using hexanes and ethyl acetate (10:1) resulting in 50% yield (18.0 mg) as a colorless oil.

<sup>1</sup>H NMR (600 MHz, CDCl<sub>3</sub>) δ 7.67 (d, *J* = 7.8 Hz, 2H), 7.57 (d, *J* = 7.2 Hz, 2H), 7.52 (t, *J* = 8.4 Hz, 4H), 7.44-7.39 (m, 6H), 7.32 (t, *J* = 7.2 Hz, 3H), 6.99 (d, *J* = 15.6 Hz, 1H), 6.36 (d, *J* = 15.6 Hz, 1H), 2.31 (s, 1H).

<sup>13</sup>C NMR (151 MHz, CDCl<sub>3</sub>) δ 148.39, 140.85, 140.47, 139.61, 135.97, 130.82, 129.46, 128.90, 128.43, 128.06, 127.42, 127.35, 127.18, 127.06, 124.78, 120.38, 82.55.

**(E)-9-(4-Fluorostyryl)-9H-fluoren-9-ol (3fa)**

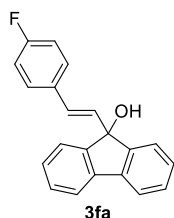

The title compound was prepared according to the general procedure as described.

Silica gel flash column chromatography was performed using hexanes and ethyl acetate (10:1) resulting in 65% yield (19.7 mg) as a colorless oil.

<sup>1</sup>H NMR (600 MHz, CDCl<sub>3</sub>) δ 7.66 (d, *J* = 7.2 Hz, 2H), 7.50 (d, *J* = 7.2 Hz, 2H), 7.39 (t, *J* = 7.8 Hz, 2H), 7.34-7.29 (m, 4H), 6.96 (t, *J* = 8.4 Hz, 2H), 6.89 (d, *J* = 15.6 Hz, 1H), 6.22 (d, *J* = 15.6 Hz, 1H), 2.31 (s, 1H).

<sup>13</sup>C NMR (151 MHz, CDCl<sub>3</sub>) δ 162.43 (*J* = 246.8 Hz), 148.18, 139.44, 133.06 (d, *J* = 3.3 Hz), 130.45, 129.46, 128.41, 128.24 (d, *J* = 7.6 Hz), 127.38, 124.72, 120.39, 115.53 (d, *J* = 21.14 Hz), 82.31.

<sup>19</sup>F NMR (565 MHz, CDCl<sub>3</sub>) δ -114.54.

HRMS (ESI): C<sub>21</sub>H<sub>15</sub>FN<sub>1</sub>O [M+Na]<sup>+</sup>, calculated: 325.0999, found: 325.1000.

**(E)-9-(4-Chlorostyryl)-9H-fluoren-9-ol (3ga)<sup>5</sup>**

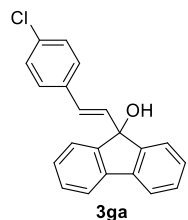

The title compound was prepared according to the general procedure as described.

Silica gel flash column chromatography was performed using hexanes and ethyl acetate (10:1) resulting in 60% yield (19.1 mg) as a colorless oil.

<sup>1</sup>H NMR (600 MHz, CDCl<sub>3</sub>) δ 7.66 (d, *J* = 7.8 Hz, 2H), 7.50 (d, *J* = 7.8 Hz, 2H), 7.39 (t, *J* = 7.2 Hz, 2H), 7.34-7.28 (m, 4H), 7.25-7.23 (m, 2H), 6.89 (d, *J* = 15.6 Hz, 1H), 6.27 (d, *J* = 15.6 Hz, 1H), 2.29 (s, 1H).

$^{13}\text{C}$  NMR (151 MHz,  $\text{CDCl}_3$ )  $\delta$  148.19, 139.58, 135.44, 133.30, 131.41, 129.52, 128.79, 128.44, 127.95, 127.33, 124.73, 120.41, 82.43.

**(*E*)-9-(4-(Trimethylsilyl)styryl)-9H-fluoren-9-ol (3ha)**

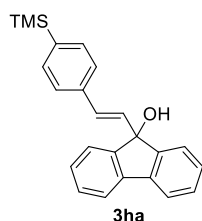

The title compound was prepared according to the general procedure as described.

Silica gel flash column chromatography was performed using hexanes and ethyl acetate (10:1) resulting in 66% yield (23.5 mg) as a yellow oil.

$^1\text{H}$  NMR (600 MHz,  $\text{CDCl}_3$ )  $\delta$  7.72-7.69 (m, 2H), 7.53 (d,  $J$  = 7.8 Hz, 2H), 7.48 (d,  $J$  = 8.1 Hz, 2H), 7.44-7.41 (m, 2H), 7.39 (d,  $J$  = 8.2 Hz, 2H), 7.35 (d,  $J$  = 8.4 Hz, 2H), 7.29 (m, 2H), 7.00 (d,  $J$  = 16.2 Hz, 1H), 6.37 (d,  $J$  = 15.6 Hz, 1H), 2.34 (s, 1H), 0.28 (s, 9H).

$^{13}\text{C}$  NMR (151 MHz,  $\text{CDCl}_3$ )  $\delta$  149.38, 139.62, 133.71, 130.96, 129.44, 128.50, 128.41, 126.05, 124.77, 120.35, 82.51, 1.00.

HRMS (ESI):  $\text{C}_{24}\text{H}_{24}\text{OSiNa}$  [ $\text{M}+\text{Na}$ ] $^+$ , calculated: 379.1489, found: 379.1490.

**(*E*)-9-(3-Chlorostyryl)-9H-fluoren-9-ol (3ia)**

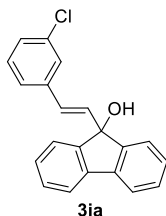

The title compound was prepared according to the general procedure as described. Silica gel flash column chromatography was performed using hexanes and ethyl acetate (10:1) resulting in 41% yield (13.1 mg) as a colorless oil.

$^1\text{H}$  NMR (600 MHz,  $\text{CDCl}_3$ )  $\delta$  7.66 (d,  $J$  = 7.5 Hz, 2H), 7.49 (d,  $J$  = 7.4 Hz, 2H), 7.40 (t,  $J$  = 7.5 Hz, 2H), 7.35 (s, 1H), 7.32 (t,  $J$  = 7.7 Hz, 2H), 7.24-7.15 (m, 3H), 6.90 (d,  $J$  = 15.8 Hz, 1H), 6.29 (d,  $J$  = 15.8 Hz, 1H), 2.29 (s, 1H).

$^{13}\text{C}$  NMR (151 MHz,  $\text{CDCl}_3$ )  $\delta$  148.11, 139.59, 138.86, 134.63, 132.36, 129.85, 129.54, 128.45, 127.59, 127.22, 126.62, 125.01, 124.73, 120.41, 82.40.

HRMS (ESI):  $\text{C}_{21}\text{H}_{15}\text{ClONa}$  [ $\text{M}+\text{Na}$ ] $^+$ , calculated: 341.0704, found: 341.0707.

**(*E*)-9-(3-Methoxystyryl)-9H-fluoren-9-ol (3ja)**

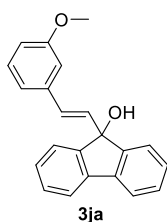

The title compound was prepared according to the general procedure as described.

Silica gel flash column chromatography was performed using hexanes and ethyl acetate (10:1) resulting in 75% yield (23.6 mg) as a colorless oil.

$^1\text{H NMR}$  (600 MHz,  $\text{CDCl}_3$ )  $\delta$  7.65 (d,  $J = 7.8$  Hz, 2H), 7.50 (d,  $J = 7.2$  Hz, 2H), 7.38 (t,  $J = 7.2$  Hz, 2H), 7.30 (t,  $J = 7.2$  Hz, 2H), 7.18 (t,  $J = 8.4$  Hz, 1H), 6.96-6.89 (m, 3H), 6.75 (d,  $J = 8.4$  Hz, 1H), 6.30 (d,  $J = 15.8$  Hz, 1H), 3.75 (s, 3H), 2.32 (s, 1H).

$^{13}\text{C NMR}$  (151 MHz,  $\text{CDCl}_3$ )  $\delta$  159.94, 148.37, 139.60, 138.37, 131.02, 129.61, 129.43, 128.46, 128.40, 124.78, 120.35, 119.48, 113.67, 111.79, 82.46, 55.34.

HRMS (ESI):  $\text{C}_{22}\text{H}_{18}\text{O}_2\text{Na}$   $[\text{M}+\text{Na}]^+$ , calculated: 337.1199, found: 337.1201.

#### **(E)-9-(2-Methoxystyryl)-9H-fluoren-9-ol (3ka)**

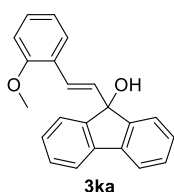

The title compound was prepared according to the general procedure as described.

Silica gel flash column chromatography was performed using hexanes and ethyl acetate (5:1) resulting in 67% yield (21.1 mg) as a colorless oil.

$^1\text{H NMR}$  (600 MHz,  $\text{CDCl}_3$ )  $\delta$  7.66 (d,  $J = 7.2$  Hz, 2H), 7.53 (d,  $J = 7.2$  Hz, 2H), 7.38 (t,  $J = 7.2$  Hz, 2H), 7.31 (t,  $J = 7.8$  Hz, 3H), 7.21-7.16 (m, 1H), 6.88-6.83 (m, 2H), 6.34 (d,  $J = 16.2$  Hz, 1H), 3.83 (s, 3H), 2.31 (s, 1H).

$^{13}\text{C NMR}$  (151 MHz,  $\text{CDCl}_3$ )  $\delta$  156.92, 148.53, 139.54, 131.04, 129.12, 128.56, 128.19, 127.08, 125.84, 124.65, 123.31, 120.56, 120.12, 111.02, 82.60, 55.47.

HRMS (ESI):  $\text{C}_{22}\text{H}_{18}\text{O}_2\text{Na}$   $[\text{M}+\text{Na}]^+$ , calculated: 337.1199, found: 337.1200.

#### **(E)-9-(2-(Naphthalen-2-yl)vinyl)-9H-fluoren-9-ol (3la)**

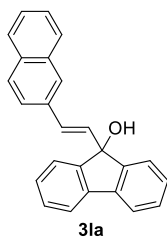

The title compound was prepared according to the general procedure as described.

Silica gel flash column chromatography was performed using hexanes and ethyl acetate (10:1) resulting in 84 % yield (28.1 mg) as a colorless oil.

$^1\text{H NMR}$  (600 MHz,  $\text{CDCl}_3$ )  $\delta$  7.76-7.72 (m, 4H), 7.67 (d,  $J = 7.2$  Hz, 2H), 7.55 (d,  $J = 7.8$  Hz, 3H), 7.43-7.39 (m, 4H), 7.33 (t,  $J = 7.8$  Hz, 2H), 7.10 (d,  $J = 15.8$  Hz, 1H), 6.45 (d,  $J = 15.8$  Hz, 1H), 2.32 (s, 1H).

$^{13}\text{C NMR}$  (151 MHz,  $\text{CDCl}_3$ )  $\delta$  148.40, 139.61, 134.37, 133.72, 133.12, 131.12, 129.46, 128.65, 128.43, 128.25, 128.09, 127.76, 126.69, 126.34, 125.95, 124.80, 123.92, 120.39, 82.61.

HRMS (ESI): C<sub>25</sub>H<sub>18</sub>O<sub>2</sub>Na [M+Na]<sup>+</sup>, calculated: 357.1250, found: 357.1250.

**(E)-9-(2-(Thiophen-2-yl)vinyl)-9H-fluoren-9-ol (3ma)**

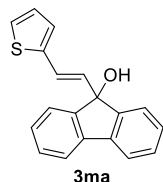

The title compound was prepared according to the general procedure as described.

Silica gel flash column chromatography was performed using hexanes and ethyl acetate (10:1) resulting in 43% yield (12.5 mg) as a colorless oil.

<sup>1</sup>H NMR (600 MHz, CDCl<sub>3</sub>) δ 7.65 (d, *J* = 7.6 Hz, 2H), 7.51 (d, *J* = 7.5 Hz, 2H), 7.43-7.36 (m, 2H), 7.32 (t, *J* = 7.5 Hz, 2H), 7.11 (d, *J* = 5.0 Hz, 1H), 7.04 (d, *J* = 15.6 Hz, 1H), 6.95 (d, *J* = 3.5 Hz, 1H), 6.93 (dd, *J* = 5.1, 3.5 Hz, 1H), 6.17 (d, *J* = 15.6 Hz, 1H), 2.24 (s, 1H).

<sup>13</sup>C NMR (151 MHz, CDCl<sub>3</sub>) δ 148.26, 142.18, 139.62, 130.36, 129.48, 128.44, 127.46, 126.02, 124.77, 124.44, 122.12, 120.38, 82.30.

HRMS (ESI): C<sub>19</sub>H<sub>14</sub>OSNa [M+Na]<sup>+</sup>, calculated: 313.0658, found: 313.0660.

**(E)-9-(2-(Pyridin-2-yl)vinyl)-9H-fluoren-9-ol (3na)<sup>5</sup>**

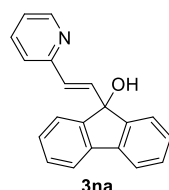

The title compound was prepared according to the general procedure as described.

Silica gel flash column chromatography was performed using hexanes and ethyl acetate (10:1) resulting in 41 % yield (11.2 mg) as a colorless oil.

<sup>1</sup>H NMR (600 MHz, CDCl<sub>3</sub>) δ 7.65 (d, *J* = 7.8 Hz, 2H), 7.49 (d, *J* = 7.2 Hz, 2H), 7.39 (t, *J* = 7.8 Hz, 2H), 7.34 (s, 1H), 7.31 (t, *J* = 7.8 Hz, 2H), 7.23 – 7.15 (m, 3H), 6.89 (d, *J* = 15.8 Hz, 1H), 6.29 (d, *J* = 15.8 Hz, 1H), 2.28 (s, 1H).

<sup>13</sup>C NMR (151 MHz, CDCl<sub>3</sub>) δ 155.52, 149.65, 148.13, 139.69, 136.56, 135.74, 129.45, 128.40, 128.34, 124.86, 122.23, 122.06, 120.35, 82.54.

**(E)-9-(Ferrocene-2)vinyl)-9H-fluoren-9-ol (3oa)**

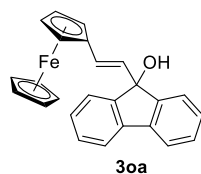

The title compound was prepared according to the general procedure as described.

Silica gel flash column chromatography was performed using hexanes and ethyl acetate (10:1) resulting in 44% yield (18.6 mg) as a colorless oil.

<sup>1</sup>H NMR (600 MHz, CDCl<sub>3</sub>) δ 7.66 (d, *J* = 7.5 Hz, 2H), 7.51 (d, *J* = 7.4 Hz, 2H), 7.39 (t, *J* = 7.4 Hz, 2H), 6.63 (d, *J* = 15.7 Hz, 1H), 5.94 (d, *J* = 15.7 Hz, 1H), 4.31 (s, 2H), 4.20-4.16 (m, 3H), 4.07 (s, 5H).



$^{13}\text{C}$  NMR (151 MHz,  $\text{CDCl}_3$ )  $\delta$  148.71, 139.56, 130.08, 129.30, 128.41, 128.34, 127.78, 126.32, 124.59, 120.34, 82.69, 82.59, 69.34, 68.90, 68.55, 67.13, 29.86.

HRMS (ESI):  $\text{C}_{25}\text{H}_{20}\text{FeONa}$   $[\text{M}+\text{Na}]^+$ , calculated: 414.0756, found: 414.0755.

#### (*E*)-2-Methyl-9-styryl-9H-fluoren-9-ol (3ab)

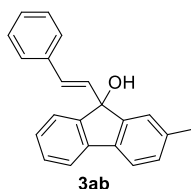

The title compound was prepared according to the general procedure as described.

Silica gel flash column chromatography was performed using hexanes and ethyl acetate (10:1) resulting in 76% yield (23.3 mg) as a yellow oil.

$^1\text{H}$  NMR (600 MHz,  $\text{CDCl}_3$ )  $\delta$  7.62 (d,  $J = 7.8$  Hz, 1H), 7.55 (d,  $J = 7.8$  Hz, 1H), 7.49 (d,  $J = 7.8$  Hz, 1H), 7.38 (d,  $J = 7.8$  Hz, 3H), 7.32 (s, 1H), 7.28 (t,  $J = 7.2$  Hz, 3H), 7.20 (t,  $J = 7.8$  Hz, 2H), 6.96 (d,  $J = 16.2$  Hz, 1H), 6.30 (d,  $J = 15.6$  Hz, 1H), 2.39 (s, 3H), 2.25 (s, 1H).

$^{13}\text{C}$  NMR (151 MHz,  $\text{CDCl}_3$ )  $\delta$  148.60, 148.27, 139.77, 138.51, 136.96, 136.91, 130.87, 130.14, 129.39, 128.66, 128.36, 127.91, 127.66, 126.75, 125.43, 124.70, 120.14, 120.04, 82.40, 21.75.

HRMS (ESI):  $\text{C}_{22}\text{H}_{18}\text{ONa}$   $[\text{M}+\text{Na}]^+$ , calculated: 321.1250, found: 321.1249.

#### (*E*)-3-Methyl-9-styryl-9H-fluoren-9-ol (3ac)

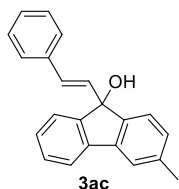

The title compound was prepared according to the general procedure as described.

Silica gel flash column chromatography was performed using hexanes and ethyl acetate (10:1) resulting in 48% yield (14.3 mg) as a colorless oil.

$^1\text{H}$  NMR (600 MHz,  $\text{CDCl}_3$ )  $\delta$  7.64 (d,  $J = 7.8$  Hz, 1H), 7.52 – 7.46 (m, 2H), 7.42 – 7.34 (m, 4H), 7.32–7.27 (m, 3H), 7.20 (t,  $J = 7.8$  Hz, 1H), 7.13 (d,  $J = 7.2$  Hz, 1H), 6.93 (d,  $J = 15.9$  Hz, 1H), 6.31 (d,  $J = 15.9$  Hz, 1H), 2.43 (s, 3H), 2.22 (s, 1H).

$^{13}\text{C}$  NMR (101 MHz,  $\text{CDCl}_3$ )  $\delta$  148.82, 145.60, 139.78, 139.66, 139.44, 136.99, 130.91, 129.36, 129.19, 128.65, 128.37, 128.29, 127.65, 126.75, 124.74, 124.51, 121.03, 120.24, 82.28, 21.76.

HRMS (ESI):  $\text{C}_{22}\text{H}_{18}\text{NaO}$   $[\text{M}+\text{Na}]^+$ , calculated: 321.1250, found: 321.1257.

#### (*E*)-3-Methoxy-9-styryl-9H-fluoren-9-ol (3ad)<sup>5</sup>

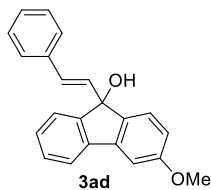

The title compound was prepared according to the general procedure as described.

Silica gel flash column chromatography was performed using hexanes and ethyl acetate (5:1) resulting in 58% yield (18.2 mg) as a colorless oil.

$^1\text{H NMR}$  (600 MHz,  $\text{CDCl}_3$ )  $\delta$  7.62 (d,  $J = 7.2$  Hz, 1H), 7.49 (d,  $J = 7.2$  Hz, 1H),

7.42-7.35 (m, 4H), 7.31 (t,  $J = 7.8$  Hz, 1H), 7.27 (t,  $J = 7.2$  Hz, 2H), 7.21-7.17 (m, 2H), 6.92 (d,  $J = 15.6$  Hz, 1H), 6.83 (dd,  $J = 7.8, 1.8$  Hz, 1H), 6.31 (d,  $J = 15.6$  Hz, 1H), 3.87 (s, 3H), 2.26 (s, 1H).

$^{13}\text{C NMR}$  (151 MHz,  $\text{CDCl}_3$ )  $\delta$  161.23, 149.42, 141.24, 140.62, 139.36, 137.06, 131.06, 129.33, 129.31, 128.92, 128.65, 128.54, 128.35, 127.64, 126.76, 126.33, 125.59, 124.69, 120.29, 113.91, 106.04, 82.04, 55.76.

#### **(E)-5-Styryl-5H-cyclopenta[2,1-b:3,4-b']dipyridin-5-ol (3ae)<sup>5</sup>**

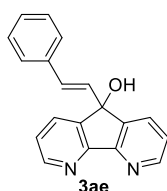

The title compound was prepared according to the general procedure as described.

Silica gel flash column chromatography was performed using hexanes and ethyl acetate (10:1) resulting in 43% yield (12.3 mg) as a colorless oil.

$^1\text{H NMR}$  (600 MHz,  $\text{CDCl}_3$ )  $\delta$  8.57-8.52 (m, 2H), 7.85 (d,  $J = 7.6$  Hz, 2H), 7.35 (d,  $J = 6.9$  Hz, 2H), 7.29 (t,  $J = 7.5$  Hz, 2H), 7.23 (m, 3H), 6.99 (d,  $J = 15.9$  Hz, 1H), 6.22 (d,  $J = 15.7$  Hz, 1H).

$^{13}\text{C NMR}$  (151 MHz,  $\text{CDCl}_3$ )  $\delta$  157.32, 151.37, 143.66, 136.33, 132.54, 130.10, 128.79, 128.67, 128.17, 126.81, 124.02, 78.74.

#### **(E)-3,6-Dimethyl-9-styryl-9H-fluoren-9-ol (3af)<sup>5</sup>**

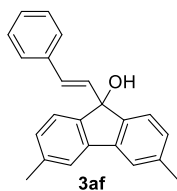

The title compound was prepared according to the general procedure as described.

Silica gel flash column chromatography was performed using hexanes and ethyl acetate (10:1) resulting in 75% yield (23.4 mg) as a colorless oil.

$^1\text{H NMR}$  (600 MHz,  $\text{CDCl}_3$ )  $\delta$  7.45 (s, 1H), 7.38-7.34 (m, 4H), 7.27-7.25 (m, 3H),

7.19 (t,  $J = 7.8$  Hz, 1H), 7.11 (d,  $J = 7.8$  Hz, 2H), 6.91 (d,  $J = 15.9$  Hz, 1H), 6.30 (d,  $J = 15.9$  Hz, 1H), 2.42 (s, 6H), 2.18 (s, 1H).

$^{13}\text{C NMR}$  (151 MHz,  $\text{CDCl}_3$ )  $\delta$  146.07, 139.83, 139.28, 137.11, 131.18, 129.03, 128.62, 128.22, 127.57, 126.74, 124.45, 120.90, 82.05, 21.73.

**(E)-3,6-Dimethoxy-9-styryl-9H-fluoren-9-ol (3ag)**

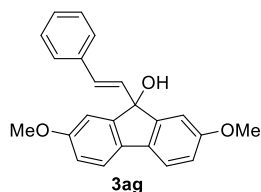

The title compound was prepared according to the general procedure as described. Silica gel flash column chromatography was performed using hexanes and ethyl acetate (10:1) resulting in 53% yield (18.3 mg) as a colorless oil.

$^1\text{H}$  NMR (600 MHz,  $\text{CDCl}_3$ )  $\delta$  7.45 (s, 2H), 7.38-7.34 (m, 4H), 7.29-7.23 (m, 3H), 7.19 (t,  $J$  = 7.8 Hz, 1H), 7.11 (d,  $J$  = 7.8 Hz, 2H), 6.91 (d,  $J$  = 15.6 Hz, 1H), 6.30 (d,  $J$  = 15.6 Hz, 1H), 2.42 (s, 6H).

$^{13}\text{C}$  NMR (151 MHz,  $\text{CDCl}_3$ )  $\delta$  146.07, 139.83, 139.28, 137.11, 131.18, 129.03, 128.62, 128.22, 127.57, 126.74, 124.45, 120.90, 82.05, 21.73.

HRMS (ESI):  $\text{C}_{23}\text{H}_{20}\text{NaO}_3^+$  [ $\text{M}+\text{Na}$ ] $^+$  calculated 367.1305, found 367.1307

**(E)-2,7-Bis(2-chloroethoxy)-9-styryl-9H-fluoren-9-ol (3ah)<sup>5</sup>**

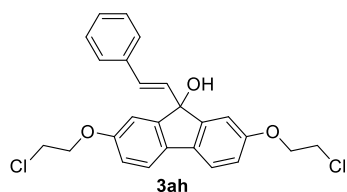

The title compound was prepared according to the general procedure as described. Silica gel flash column chromatography was performed using hexanes and ethyl acetate (10:1) resulting in 32% yield (14.1 mg) as a colorless oil.

$^1\text{H}$  NMR (600 MHz,  $\text{CDCl}_3$ )  $\delta$  7.47 (d,  $J$  = 8.3 Hz, 1H), 7.37 (d,  $J$  = 7.4 Hz, 2H), 7.29 (t,  $J$  = 7.7 Hz, 2H), 7.22 (d,  $J$  = 7.4 Hz, 2H), 7.04 (d,  $J$  = 2.4 Hz, 1H), 6.94 (d,  $J$  = 16.0 Hz, 1H), 6.93-6.88 (m, 2H), 6.25 (d,  $J$  = 15.9 Hz, 1H), 4.25 (t,  $J$  = 5.9 Hz, 4H), 3.80 (t,  $J$  = 5.9 Hz, 4H), 2.28 (s, 1H).

$^{13}\text{C}$  NMR (151 MHz,  $\text{CDCl}_3$ )  $\delta$  158.41, 150.15, 136.82, 132.95, 130.56, 128.78, 128.71, 127.83, 126.82, 120.61, 116.24, 111.34, 82.30, 68.68, 42.02.

**(E)-11-Styryl-11H-benzo[b]fluoren-11-ol (3ai)**

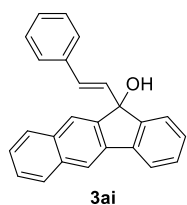

The title compound was prepared according to the general procedure as described. Silica gel flash column chromatography was performed using hexanes and ethyl acetate (10:1) resulting in 67% yield (22.4 mg) as a colorless oil.

$^1\text{H}$  NMR (600 MHz,  $\text{CDCl}_3$ )  $\delta$  8.07 (s, 1H), 7.94 (s, 1H), 7.89 (d,  $J$  = 7.8 Hz, 1H), 7.86-7.79 (m, 2H), 7.57 (d,  $J$  = 7.8 Hz, 1H), 7.52 – 7.42 (m, 3H), 7.40-7.34 (m, 3H), 7.28 (t,  $J$  = 7.8 Hz, 2H), 7.20 (t,  $J$  = 7.2 Hz, 1H), 6.97 (d,  $J$  = 15.6 Hz, 1H), 6.43 (d,  $J$  = 15.6 Hz, 1H), 2.41 (s, 1H).

$^{13}\text{C}$  NMR (151 MHz,  $\text{CDCl}_3$ )  $\delta$  148.82, 146.62, 139.19, 137.79, 136.94, 134.62, 133.95, 131.29, 129.69,

129.06, 128.74, 128.69, 128.50, 128.42, 127.75, 126.83, 126.67, 126.18, 125.12, 124.08, 120.95, 118.76, 82.14.

HRMS (ESI):  $C_{25}H_{18}NaO^+$   $[M+Na]^+$  calculated 357.1250, found 357.1246.

#### (*E*)-11-Styryl-11H-benzo[*a*]fluoren-11-ol (3aj)<sup>5</sup>

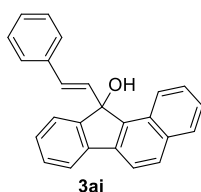

The title compound was prepared according to the general procedure as described.

Silica gel flash column chromatography was performed using hexanes and ethyl acetate (10:1) resulting in 68% yield (22.7 mg) as a colorless oil.

<sup>1</sup>H NMR (600 MHz, CDCl<sub>3</sub>) δ 8.66 (d, *J* = 8.4 Hz, 1H), 8.23 (d, *J* = 7.8 Hz, 1H), 7.92 (d, *J* = 7.8 Hz, 1H), 7.83 (d, *J* = 7.8 Hz, 1H), 7.65-7.63 (m, 2H), 7.58 (d, *J* = 7.2 Hz, 1H), 7.54 (t, *J* = 7.8 Hz, 1H), 7.47 (t, *J* = 7.8, 1H), 7.36-7.32 (m, 3H), 7.26 (t, *J* = 7.2 Hz, 2H), 7.19 (t, *J* = 12.6 Hz, 1H), 7.01 (d, *J* = 15.9 Hz, 1H), 6.29 (d, *J* = 15.9 Hz, 1H).

<sup>13</sup>C NMR (151 MHz, CDCl<sub>3</sub>) δ 149.56, 147.00, 140.65, 136.99, 135.00, 134.39, 130.54, 129.52, 128.95, 128.66, 127.70, 127.62, 127.19, 126.76, 126.09, 124.61, 124.24, 123.42, 122.10, 82.30.

#### 1,1-Diphenylpropan-1-ol (6aa)<sup>6</sup>

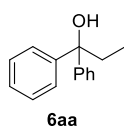

The title compound was prepared according to the general procedure as described. Silica gel flash column chromatography was performed using hexanes and ethyl acetate (100:1) resulting in 60% yield (12.8 mg) as a colorless oil.

<sup>1</sup>H NMR (600 MHz, CDCl<sub>3</sub>) δ 7.43-7.40 (m, 4H), 7.30 (t, *J* = 7.8 Hz, 4H), 7.25-7.19 (m, 2H), 2.32 (q, *J* = 7.3 Hz, 2H), 2.06 (s, 1H), 0.88 (t, *J* = 7.2 Hz, 3H).

<sup>13</sup>C NMR (151 MHz, CDCl<sub>3</sub>) δ 147.06, 128.25, 126.90, 126.25, 78.61, 34.60, 8.29.

#### 1-(4-Methoxyphenyl)-1-phenylpropan-1-ol (6ba)<sup>7</sup>

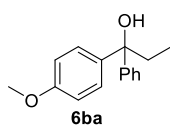

The title compound was prepared according to the general procedure as described, silica gel flash column chromatography was performed using hexanes and ethyl acetate (100:1) resulting in 11.9 mg of colorless oil in 49% yield.

<sup>1</sup>H NMR (600 MHz, CDCl<sub>3</sub>) δ 7.41-7.37 (m, 2H), 7.35-7.29 (m, 4H), 7.24-7.19 (m, 1H), 6.84 (d, *J* = 8.8 Hz, 2H), 3.78 (s, 3H), 2.29 (q, *J* = 7.3 Hz, 2H), 2.02 (s, 1H), 0.87 (t, *J* = 7.3 Hz, 3H).

$^{13}\text{C}$  NMR (151 MHz,  $\text{CDCl}_3$ )  $\delta$  158.47, 147.21, 139.44, 128.18, 127.52, 126.77, 126.21, 113.55, 78.35, 55.36, 34.71, 8.35.

#### 1-Phenyl-1-(4-(trifluoromethyl)phenyl)propan-1-ol (6ca)<sup>8</sup>

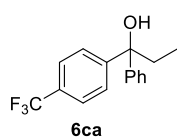

The title compound was prepared according to the general procedure as described, silica gel flash column chromatography was performed using hexanes and ethyl acetate (100:1) resulting in 8.5 mg of colorless oil in 30% yield.

$^1\text{H}$  NMR (600 MHz,  $\text{CDCl}_3$ )  $\delta$  7.57-7.51 (m, 4H), 7.41 (d,  $J = 7.2$  Hz, 2H), 7.33 (t,  $J = 7.8$  Hz, 2H), 7.27-7.22 (m, 1H), 2.33 (qd,  $J = 7.2, 4.7$  Hz, 2H), 2.11 (s, 1H), 0.89 (t,  $J = 7.3$  Hz, 3H).

$^{13}\text{C}$  NMR (151 MHz,  $\text{CDCl}_3$ )  $\delta$  150.92, 146.41, 129.06 (q,  $J = 32.5$  Hz), 127.39, 126.58, 126.19, 125.18 (q,  $J = 3.9$  Hz), 124.36 (q,  $J = 272.1$  Hz), 78.42, 34.51, 8.12.

$^{19}\text{F}$  NMR (565 MHz,  $\text{CDCl}_3$ )  $\delta$  -62.46.

#### 1-(1-Methyl-1H-indol-2-yl)-1-phenylpropan-1-ol (6da)

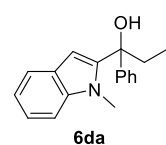

The title compound was prepared according to the general procedure as described, silica gel flash column chromatography was performed using hexanes and ethyl acetate (100:1) resulting in 12.0 mg of colorless oil in 45% yield.

$^1\text{H}$  NMR (400 MHz,  $\text{CDCl}_3$ )  $\delta$  7.63 (dd,  $J = 12$  Hz, 1H), 7.34-7.26 (m, 3H), 7.25 (s, 1H), 7.10 (ddd,  $J = 7.9, 6.1, 1.9$  Hz, 1H), 6.69 (s, 1H), 3.38 (s, 3H), 2.35 (ddt,  $J = 19.0, 13.9, 7.0$  Hz, 2H), 1.99 (s, 1H), 0.91 (t,  $J = 7.4$  Hz, 3H).

$^{13}\text{C}$  NMR (151 MHz,  $\text{CDCl}_3$ )  $\delta$  144.04, 143.83, 138.50, 128.10, 126.90, 126.78, 126.07, 121.96, 120.79, 119.58, 109.24, 100.57, 75.85, 36.48, 31.45, 7.93.

HRMS (ESI):  $\text{C}_{18}\text{H}_{20}\text{NO}$   $[\text{M}+\text{H}]^+$ , calculated: 266.1539, found: 266.1540.

#### 1-(Naphthalen-2-yl)-1-phenylpropan-1-ol (6ea)<sup>9</sup>

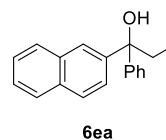

The title compound was prepared according to the general procedure as described, silica gel flash column chromatography was performed using hexanes and ethyl acetate (100:1) resulting in 10.8 mg of colorless oil in 41% yield.

$^1\text{H}$  NMR (400 MHz,  $\text{CDCl}_3$ )  $\delta$  7.98 (s, 1H), 7.84 (d,  $J = 6.8$  Hz, 1H), 7.78 (d,  $J = 8.4$  Hz, 1H), 7.74 (d,  $J = 8.8$  Hz, 1H), 7.50-7.38 (m, 5H), 7.31 (t,  $J = 7.2$  Hz, 2H), 7.22 (t,  $J = 7.6$  Hz, 1H), 2.43 (q,  $J = 7.2$  Hz, 2H), 2.17 (s, 1H), 0.91 (t,  $J = 7.2$  Hz, 3H).

$^{13}\text{C}$  NMR (151 MHz,  $\text{CDCl}_3$ )  $\delta$  146.99, 144.37, 133.26, 132.52, 128.42, 128.32, 128.00, 127.62, 127.03, 126.42, 126.18, 126.01, 125.23, 124.45, 78.79, 34.47, 8.31.

HRMS (ESI):  $\text{C}_{19}\text{H}_{18}\text{ONa}$   $[\text{M}+\text{Na}]^+$ , calculated: 285.1250, found: 285.1252.

#### 1-Phenyl-1-(pyren-2-yl)propan-1-ol (6fa)

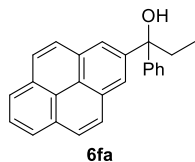

The title compound was prepared according to the general procedure as described, silica gel flash column chromatography was performed using hexanes and ethyl acetate (100:1) resulting in 3.9 mg of colorless oil in 12% yield.

$^1\text{H}$  NMR (400 MHz,  $\text{CDCl}_3$ )  $\delta$  8.44 (d,  $J = 8.4$  Hz, 1H), 8.22 (dd,  $J = 18.0, 9.2$  Hz, 2H), 8.12 (d,  $J = 7.2$  Hz, 1H), 8.08-8.01 (m, 3H), 7.93 (t,  $J = 7.6$  Hz, 1H), 7.80 (d,  $J = 9.6$  Hz, 1H), 7.39 (d,  $J = 7.2$  Hz, 2H), 7.29-7.22 (m, 2H), 7.20 (t,  $J = 7.2$  Hz, 1H), 2.70 (dq,  $J = 14.4, 7.2$  Hz, 1H), 2.59 (dq,  $J = 14.4, 7.2$  Hz, 1H), 2.40 (s, 1H), 0.91 (t,  $J = 7.6$  Hz, 3H).

$^{13}\text{C}$  NMR (101 MHz,  $\text{CDCl}_3$ )  $\delta$  147.99, 139.56, 131.41, 131.24, 130.44, 128.86, 127.62, 127.48, 126.90, 126.64, 126.30, 126.24, 126.13, 126.02, 125.19, 124.94, 124.85, 124.13, 79.59, 35.92, 8.64.

HRMS (ESI):  $\text{C}_{25}\text{H}_{20}\text{ONa}$   $[\text{M}+\text{Na}]^+$ , calculated: 359.1406, found: 359.1408.

#### 1-(4-Fluorophenyl)-1-phenylpropan-1-ol (6ab)<sup>8</sup>

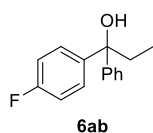

The title compound was prepared according to the general procedure as described, silica gel flash column chromatography was performed using hexanes and ethyl acetate (100:1) resulting in 9.6 mg of colorless oil in 42% yield.

$^1\text{H}$  NMR (600 MHz,  $\text{CDCl}_3$ )  $\delta$  7.41-7.36 (m, 4H), 7.31 (t,  $J = 7.8$  Hz, 2H), 7.23 (t,  $J = 7.3$  Hz, 1H), 6.98 (t,  $J = 8.4$  Hz, 2H), 2.30 (m, 2H), 2.05 (s, 1H), 0.87 (t,  $J = 7.3$  Hz, 3H).

$^{13}\text{C}$  NMR (101 MHz,  $\text{CDCl}_3$ )  $\delta$  146.89, 128.00 (d,  $J = 12.1$  Hz), 127.88, 127.80, 126.91, 126.03, 115.06, 114.89, 114.68, 78.14, 34.57, 8.09.

$^{13}\text{C}$  NMR (151 MHz,  $\text{CDCl}_3$ )  $\delta$  161.78 (d,  $J = 245.5$  Hz), 146.89, 142.88 (d,  $J = 3.1$  Hz), 128.35, 128.00 (d,  $J = 7.9$  Hz), 127.07, 126.19, 114.95 (d,  $J = 21.1$  Hz), 78.30, 34.74, 8.24.

$^{19}\text{F}$  NMR (565 MHz,  $\text{CDCl}_3$ )  $\delta$  -116.47.

#### 1-Phenyl-1-(p-tolyl)propan-1-ol (6ac)<sup>8</sup>

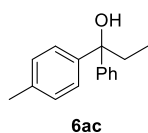

The title compound was prepared according to the general procedure as described, silica gel flash column chromatography was performed using hexanes and ethyl acetate (100:1) resulting in 7.0 mg of colorless oil in 31% yield.

$^1\text{H NMR}$  (400 MHz,  $\text{CDCl}_3$ )  $\delta$  7.45-7.36 (d,  $J = 7.2$  Hz, 2H), 7.32-7.26 (m, 2H), 7.20 (t,  $J = 7.1$  Hz, 1H), 7.11 (d,  $J = 8.0$  Hz, 2H), 2.34-2.26 (m, 5H), 0.87 (t,  $J = 7.3$  Hz, 2H).

$^{13}\text{C NMR}$  (101 MHz,  $\text{CDCl}_3$ )  $\delta$  147.21, 144.23, 136.50, 128.96, 128.20, 126.79, 126.21, 126.19, 78.51, 34.62, 21.11, 8.33.

### 2-Methyl-1,1-diphenylpropan-1-ol (**6ad**)<sup>6</sup>

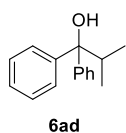

The title compound was prepared according to the general procedure as described, silica gel flash column chromatography was performed using hexanes and ethyl acetate (100:1) resulting in 4.6 mg of colorless oil in 20% yield.

$^1\text{H NMR}$  (600 MHz,  $\text{CDCl}_3$ )  $\delta$  7.50 (d,  $J = 7.2$  Hz, 4H), 7.28 (t,  $J = 7.8$  Hz, 4H), 7.17 (t,  $J = 7.2$  Hz, 2H), 2.89 (p,  $J = 6.7$  Hz, 1H), 2.04 (s, 1H), 0.89 (d,  $J = 7.2$  Hz, 6H).

$^{13}\text{C NMR}$  (151 MHz,  $\text{CDCl}_3$ )  $\delta$  146.85, 128.23, 126.49, 125.84, 80.60, 35.20, 17.33.

### 1,1,3-Triphenylpropan-1-ol (**6ae**)<sup>10</sup>

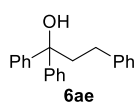

The title compound was prepared according to the general procedure as described, silica gel flash column chromatography was performed using hexanes and ethyl acetate (100:1)

resulting in 15.5 mg of colorless oil in 54% yield.

$^1\text{H NMR}$  (600 MHz,  $\text{CDCl}_3$ )  $\delta$  7.45 (d,  $J = 7.8$  Hz, 4H), 7.33 (t,  $J = 7.2$  Hz, 4H), 7.26 (m, 4H), 7.17 (m, 3H), 2.61 (s, 4H), 2.15 (s, 1H).

$^{13}\text{C NMR}$  (151 MHz,  $\text{CDCl}_3$ )  $\delta$  146.93, 142.47, 128.57, 128.53, 128.39, 127.08, 126.14, 125.97, 78.37, 44.14, 30.42.

### 3-(Furan-2-yl)-1,1-diphenylpropan-1-ol (**6af**)

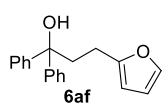

The title compound was prepared according to the general procedure as described, silica gel flash column chromatography was performed using hexanes and ethyl acetate

(100:1) resulting in 10.9 mg of colorless oil in 39% yield.

$^1\text{H}$  NMR (600 MHz,  $\text{CDCl}_3$ )  $\delta$  7.44 (d,  $J = 7.2$  Hz, 4H), 7.32 (t,  $J = 7.8$  Hz, 4H), 7.29 (s, 1H), 7.24 (t,  $J = 7.2$  Hz, 2H), 6.26 (d,  $J = 1.4$  Hz, 1H), 5.96 (d,  $J = 3.1$  Hz, 2H), 2.64 (s, 4H), 2.15 (s, 1H).

$^{13}\text{C}$  NMR (151 MHz,  $\text{CDCl}_3$ )  $\delta$  156.06, 146.69, 141.06, 128.41, 127.15, 126.15, 110.28, 104.86, 78.08, 22.97.

HRMS (ESI):  $\text{C}_{19}\text{H}_{18}\text{O}_2\text{Na}$   $[\text{M}+\text{Na}]^+$ , calculated: 301.1199, found: 301.1200.



## VI. References

1. (a) A.-M. Carroll, M. McCarthy, P. M. Lacey, C. P. Saunders, D. J. Connolly, A. Farrell, B. V. Rokade, R. Goddard, P. Fristrup, P.-O. Norrby and P. J. Guiry, Synthetic and Mechanistic Studies in Enantioselective Allylic Substitutions Catalysed by Palladium Complexes of a Modular Class of Axially Chiral Quinazoline-Containing Ligands, *Tetrahedron*, 2020, **76**, 130780; (b) J. Rodriguez, D. Vesseur, A. Tabey, S. Mallet-Ladeira, K. Miqueu and D. Bourissou, Au(I)/Au(III) Catalytic Allylation Involving  $\pi$ -Allyl Au(III) Complexes, *ACS Catal.*, 2022, **12**, 993-1003.
2. W. Yang, C. Chen and K. S. Chan, Hydrodebromination of Allylic and Benzylic Bromides with Water Catalyzed by a Rhodium Porphyrin Complex, *Dalton Trans.*, 2018, **47**, 12879-12883
3. (a) H. Li, R.-Y. Zhu, W.-J. Shi, K.-H. He and Z.-J. Shi, Synthesis of Fluorenone Derivatives through Pd-Catalyzed Dehydrogenative Cyclization, *Org. Lett.*, 2012, **14**, 4850-4853; (b) G. An, L. Wang and J. Han, Palladium Catalyzed Regioselective Cyclization of Arylcarboxylic Acids via Radical Intermediates with Diaryliodonium Salts, *Org. Lett.*, 2021, **23**, 8688-8693.
4. T. Nishimura, T. Katoh and T. Hayashi, Rhodium-Catalyzed Aryl Transfer from Trisubstituted Aryl Methanols to  $\alpha,\beta$ -Unsaturated Carbonyl Compounds, *Angew. Chem. Int. Ed.*, 2007, **46**, 4937-4939.
5. Z.-Q. Liu, C. Liang, Z. Luo, Y.-F. Wu, C.-M. Hong, Q.-H. Li and T.-L. Liu, Transfer Vinylation and Dienylation via Rhodium(I)-Catalyzed Deketonation of Allylic Alcohols, *ACS Catal.*, 2022, **12**, 7030-7036.
6. M. Hatano, S. Suzuki and K. Ishihara, Highly Efficient Alkylation to Ketones and Aldimines with Grignard Reagents Catalyzed by Zinc(II) Chloride, *J. Am. Chem. Soc.*, 2006, **128**, 9998-9999.
7. T. Pieterse, M. Visser, C. Marais and B. C. B. Bezuidenhout, Al(OTf)<sub>3</sub>: An Efficient Lewis Acid Additive for Domino Addition–Elimination of Grignard Reagents to Activated Ketones, *Synlett*, 2016, **27**, 1541-1546.
8. Y.-X. Liao, C.-H. Xing and Q.-S. Hu, Rhodium(I)/Diene-Catalyzed Addition Reactions of Arylborons with Ketones, *Org. Lett.*, 2012, **14**, 1544-1547.
9. K. Osakama and M. Nakajima, Asymmetric Direct 1,2-Addition of Aryl Grignard Reagents to Aryl Alkyl Ketones, *Org. Lett.*, 2016, **18**, 236-239.
10. M. N. Abualhasan, J. A. D. Good, K. Wittayanarakul, N. G. Anthony, G. Berretta, O. Rath, F. Kozielski, O. B. Sutcliffe and S. P. Mackay, Doing the Methylene Shuffle – Further Insights into the

Inhibition of Mitotic Kinesin Eg5 with S-trityl l-cysteine, *Eur. J. Med. Chem.*, 2012, **54**, 483-498.

## VII. NMR spectra of the products

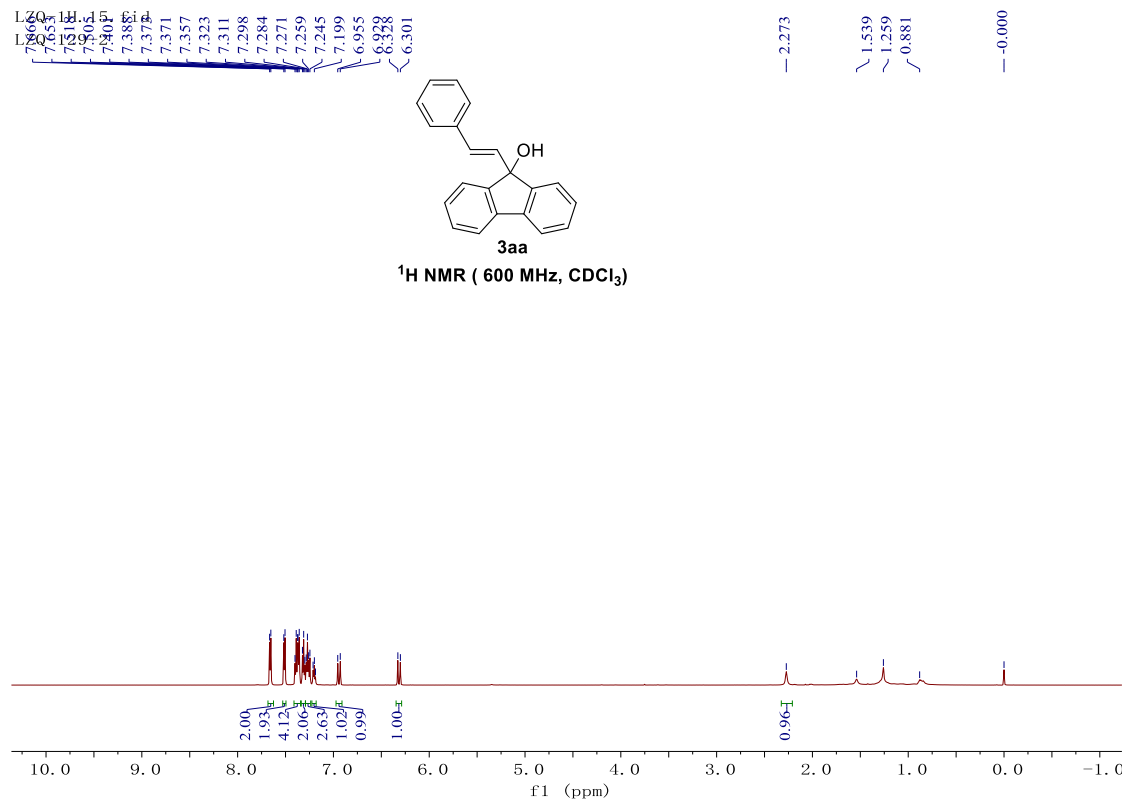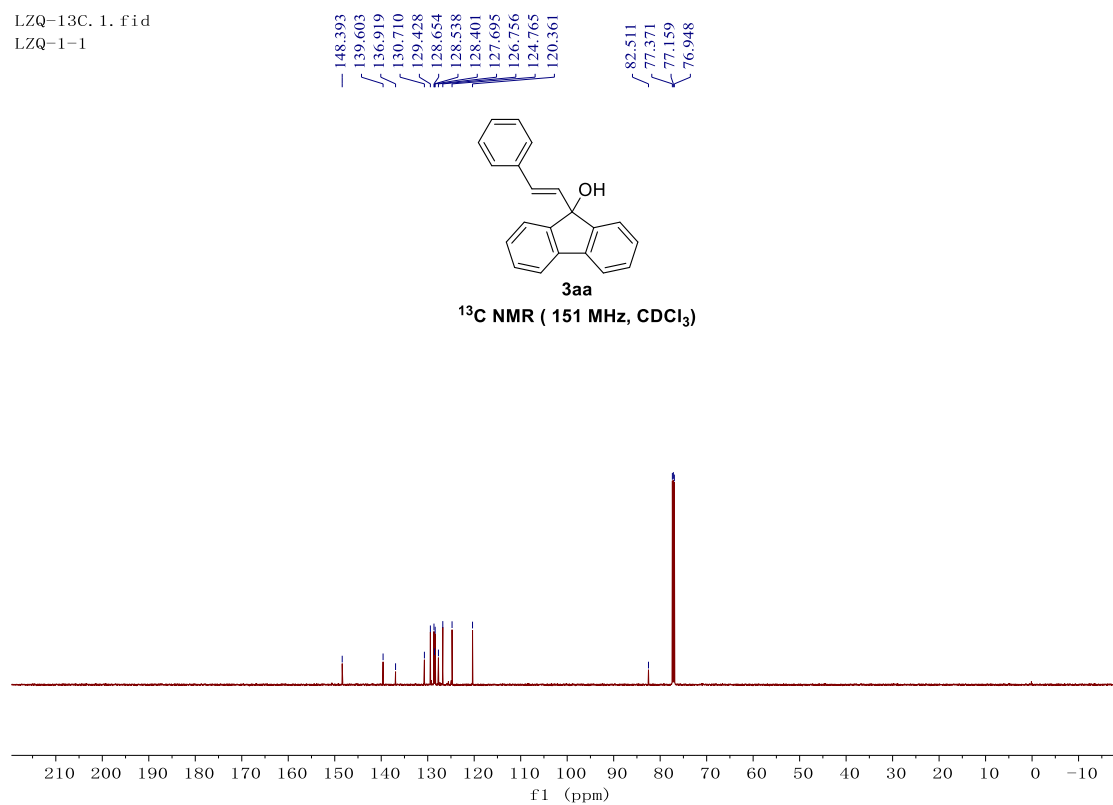

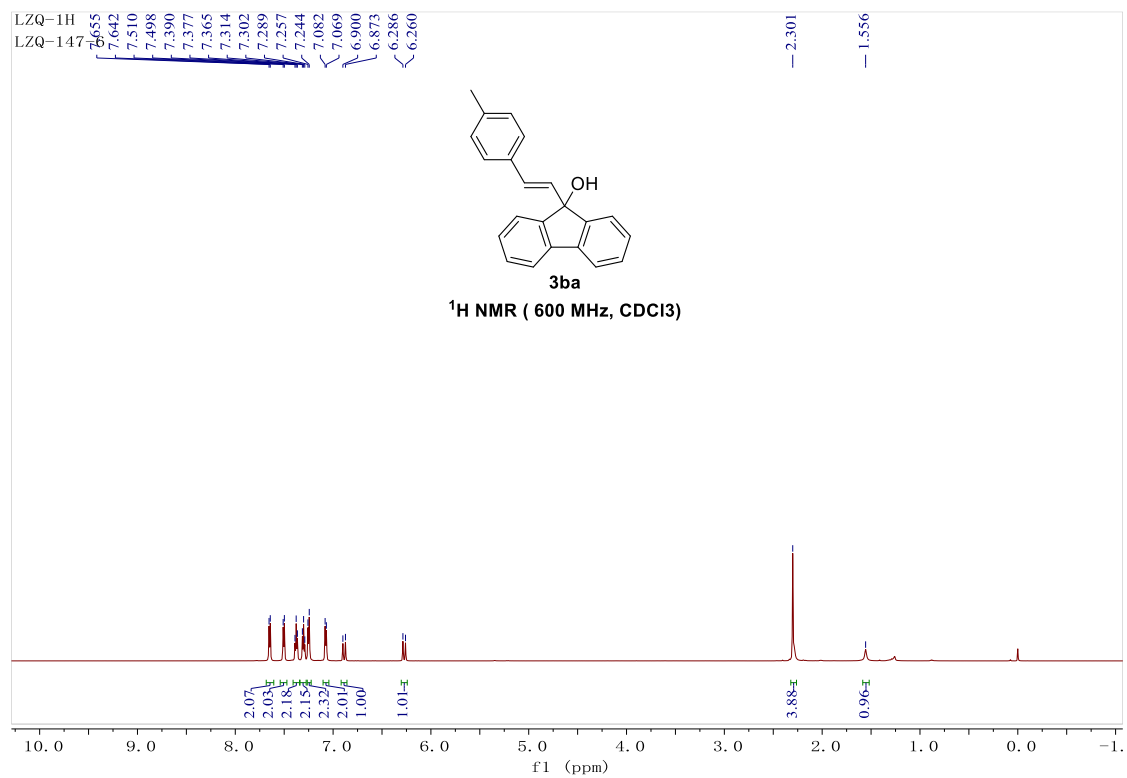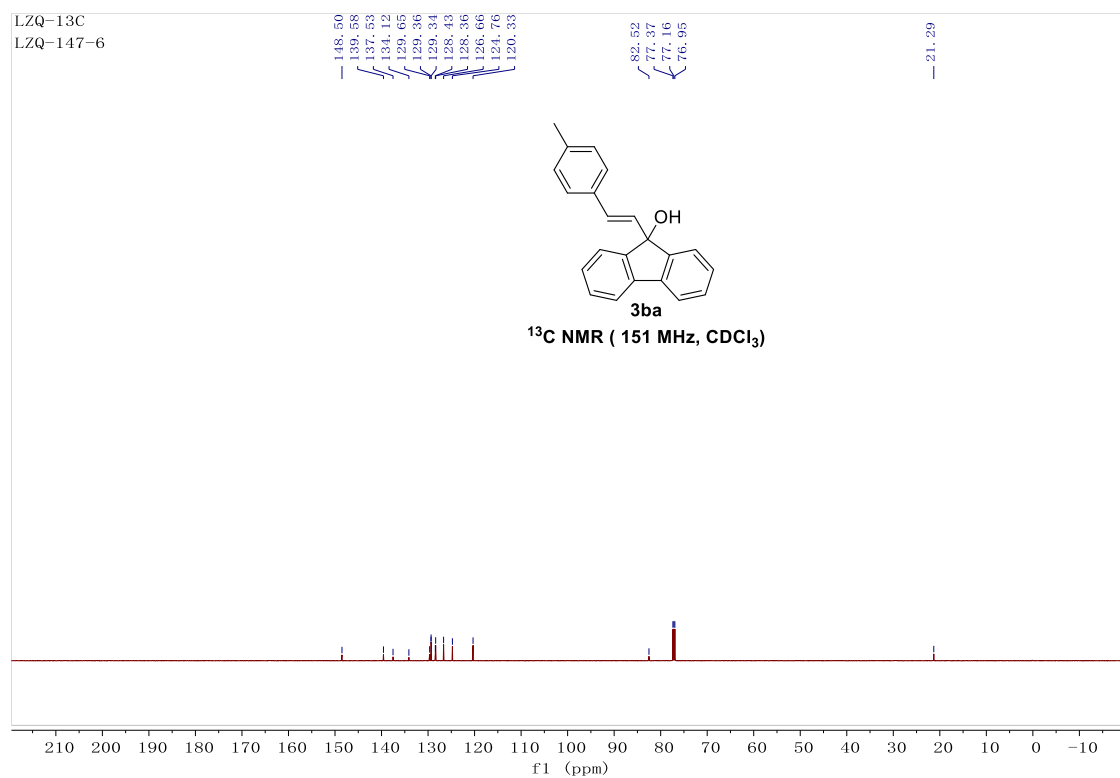

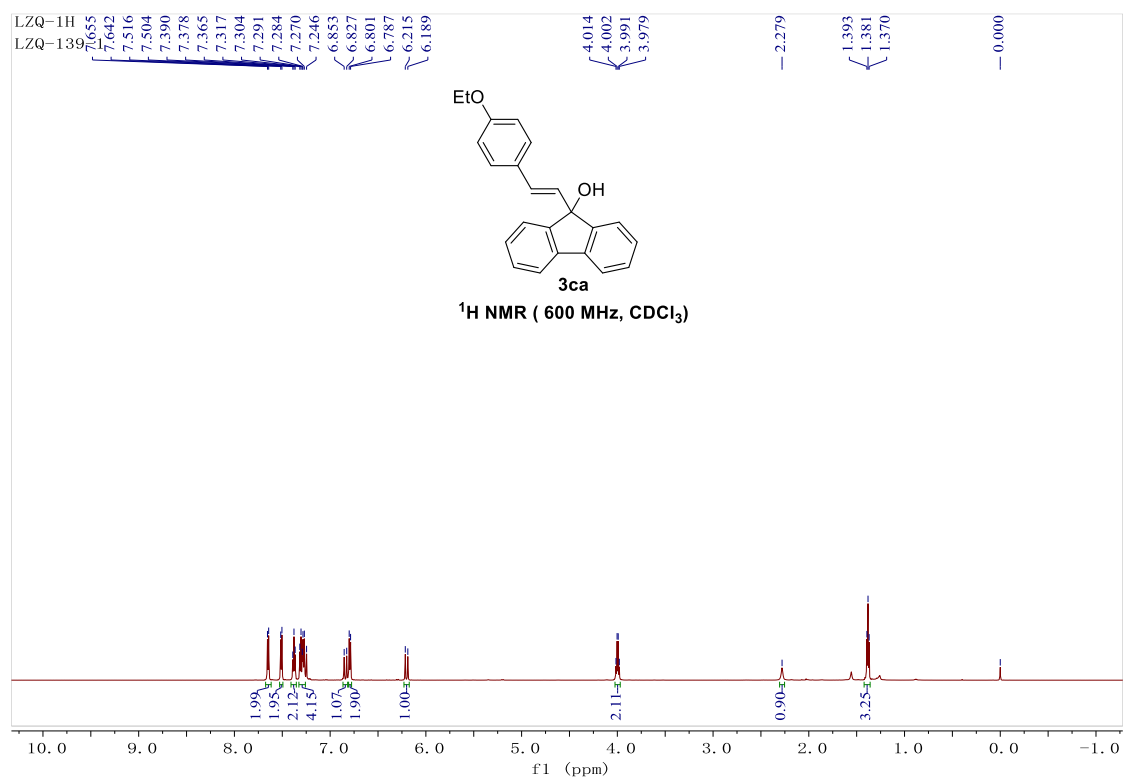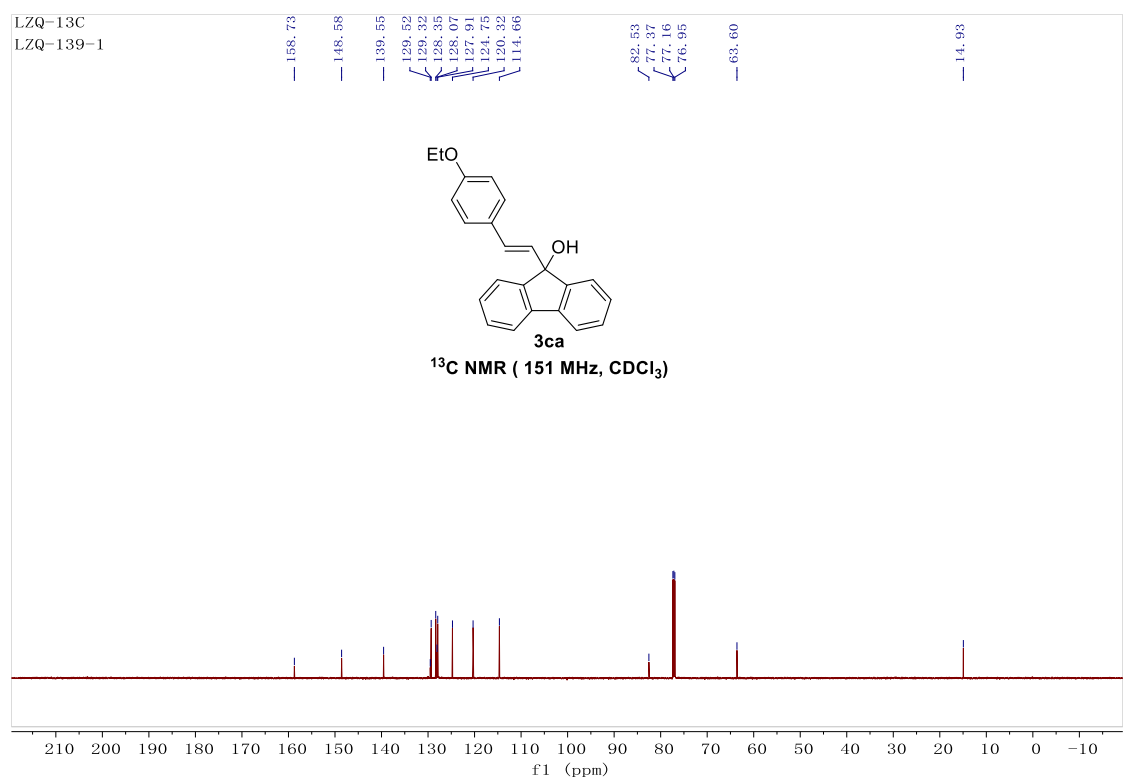

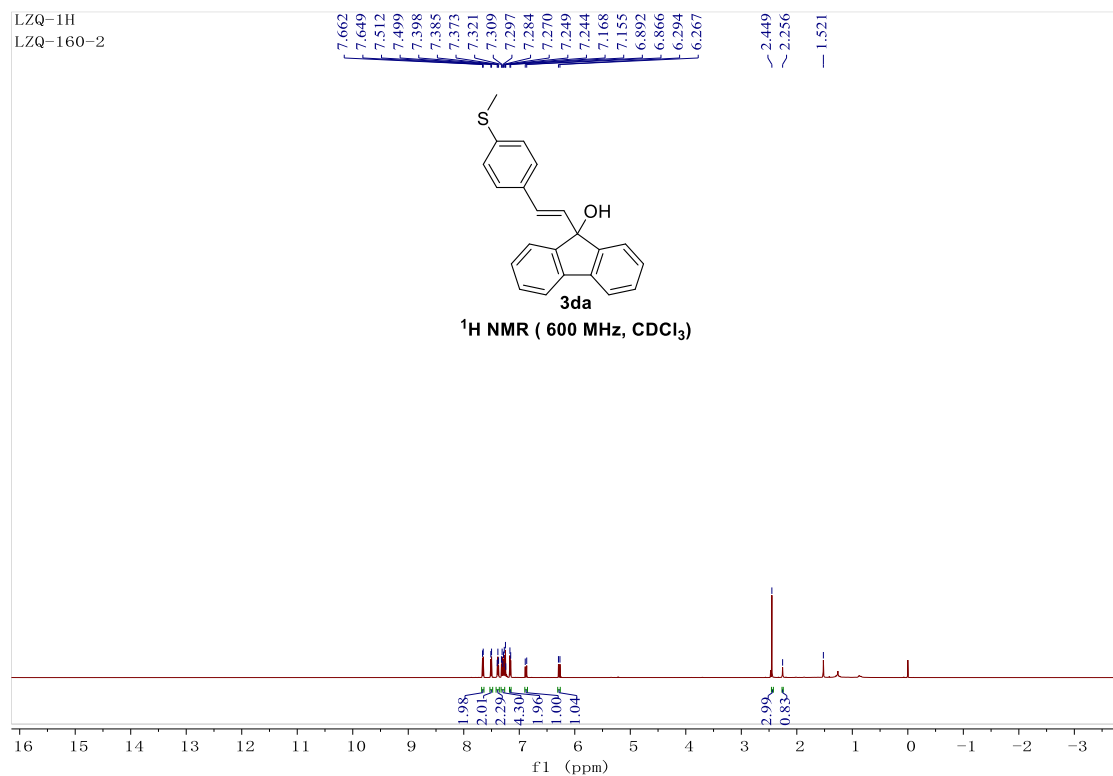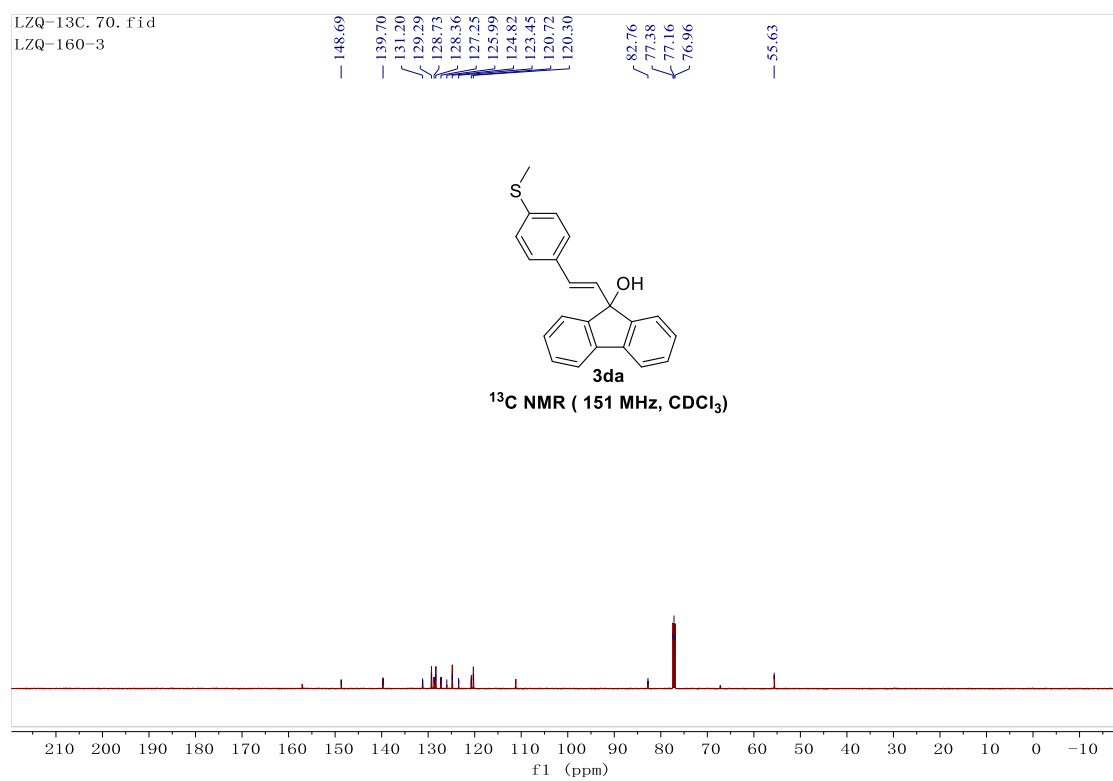

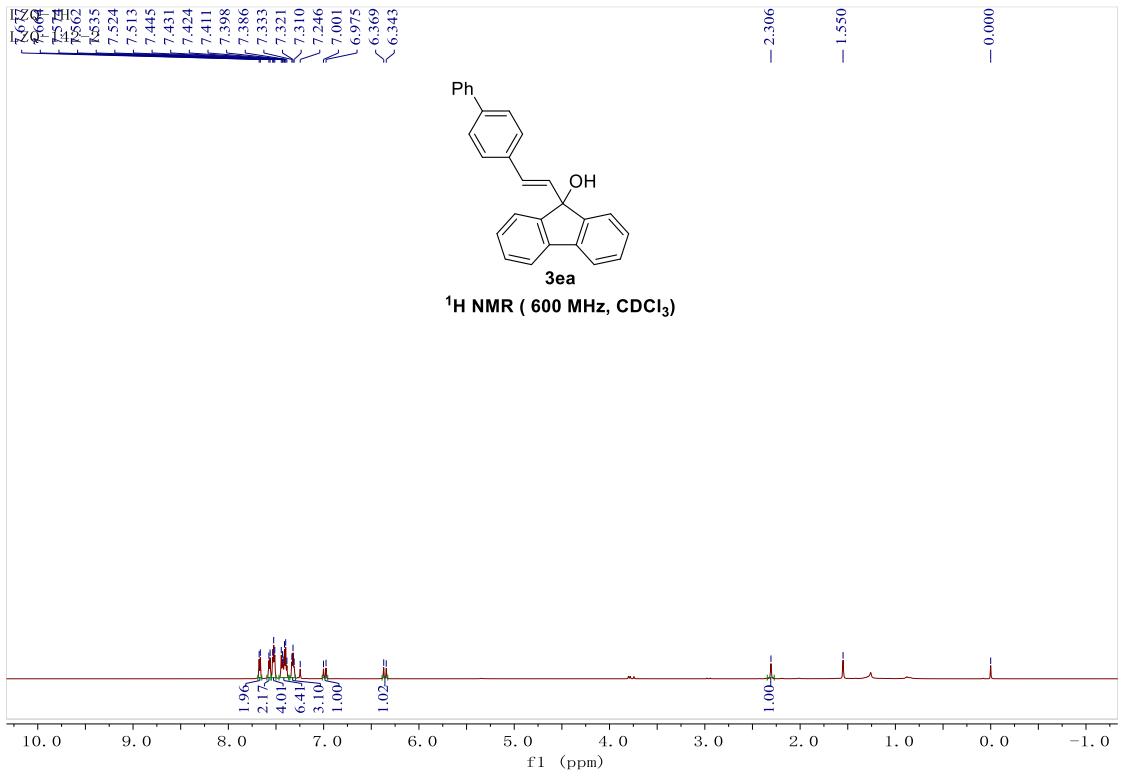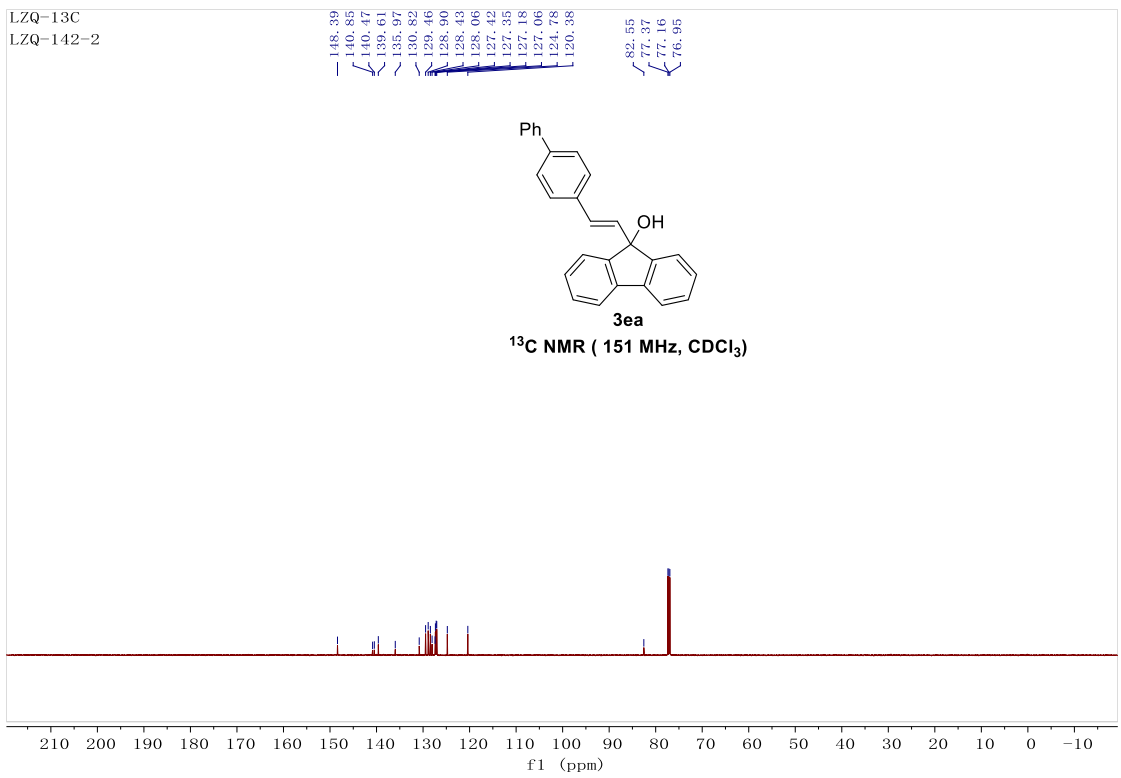

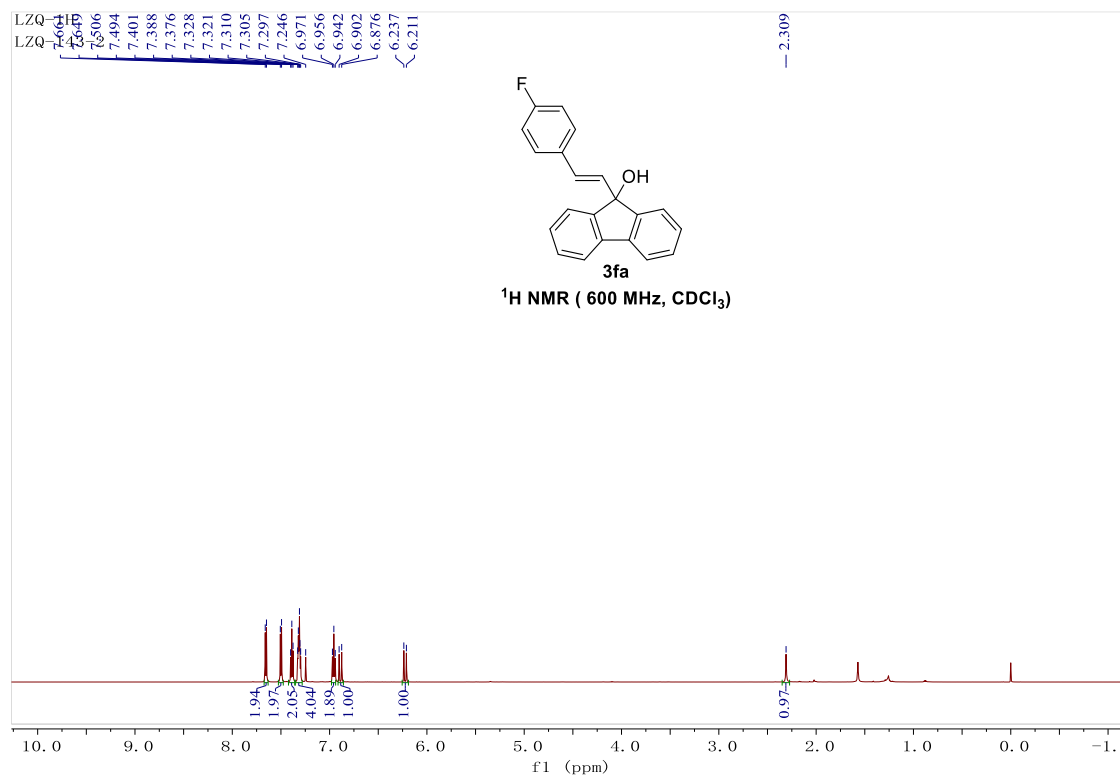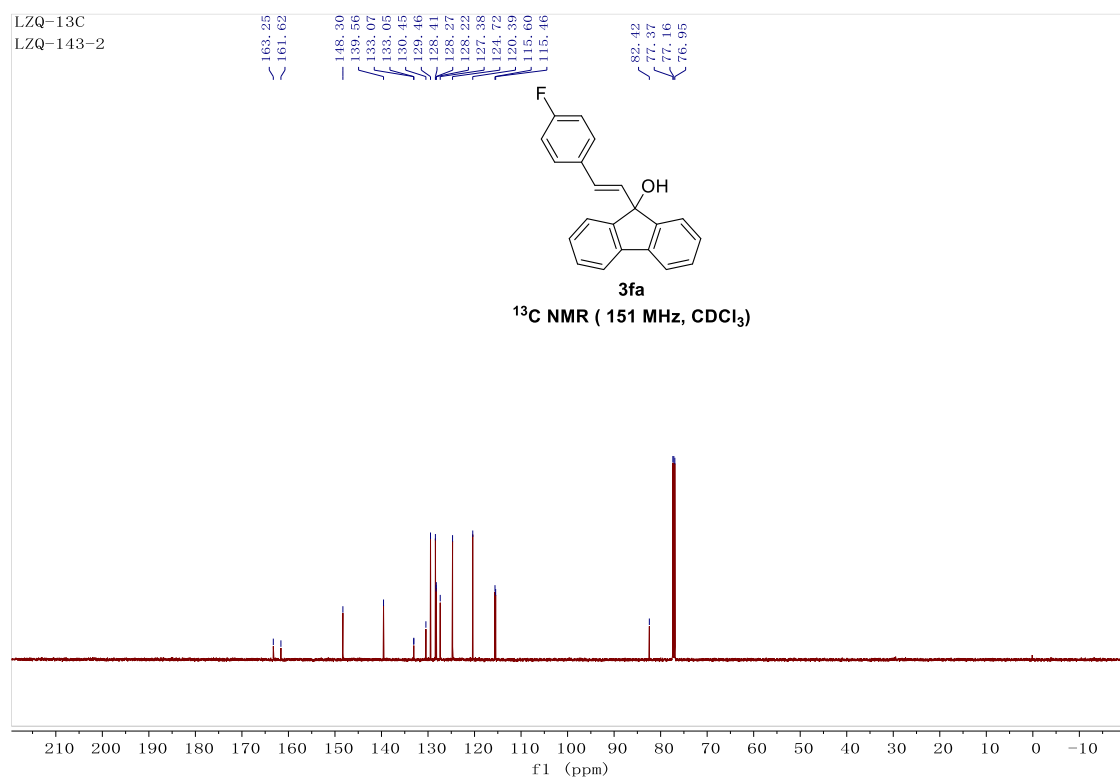



XSQ-19F.1.fid  
XSQ-3CA

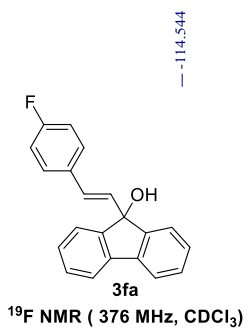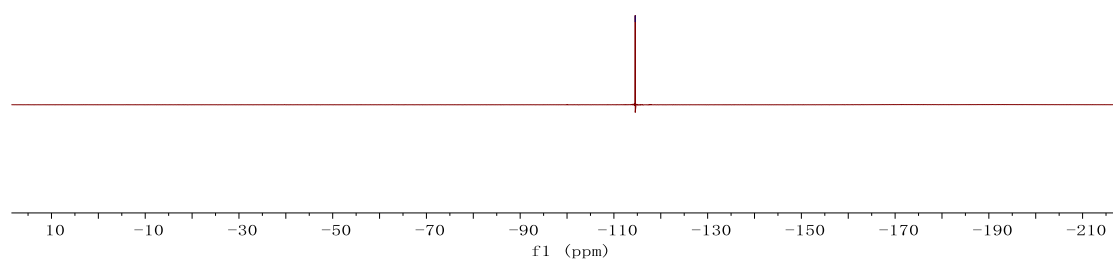

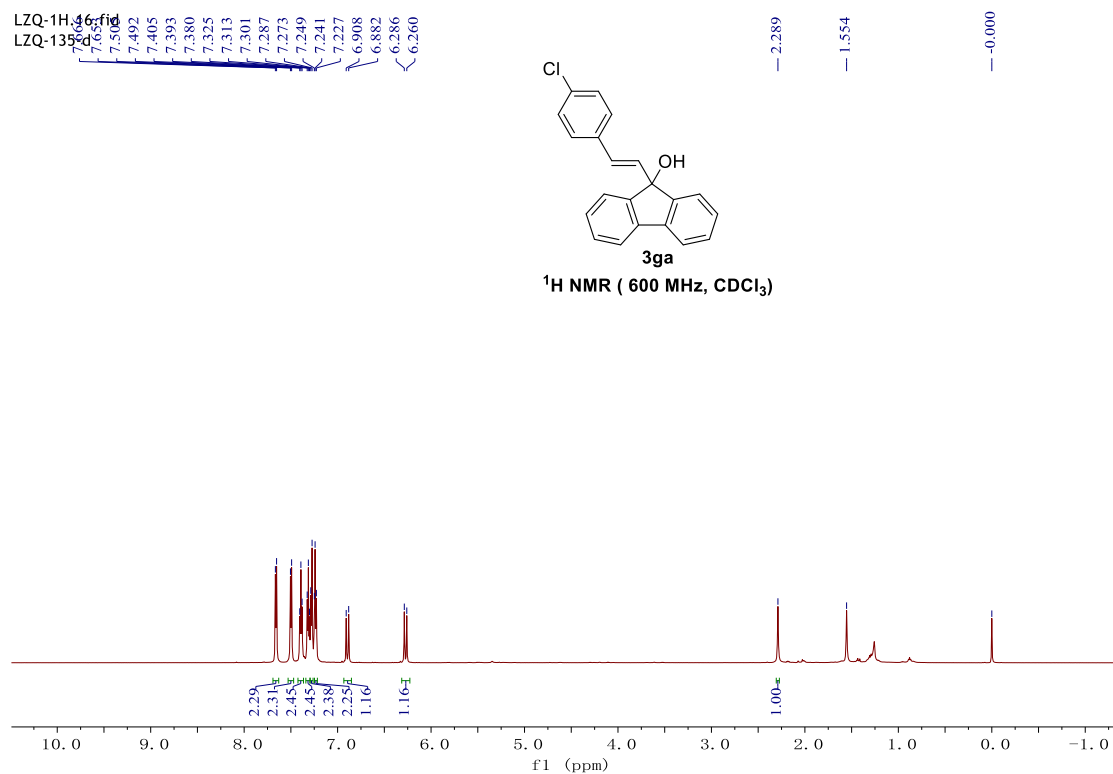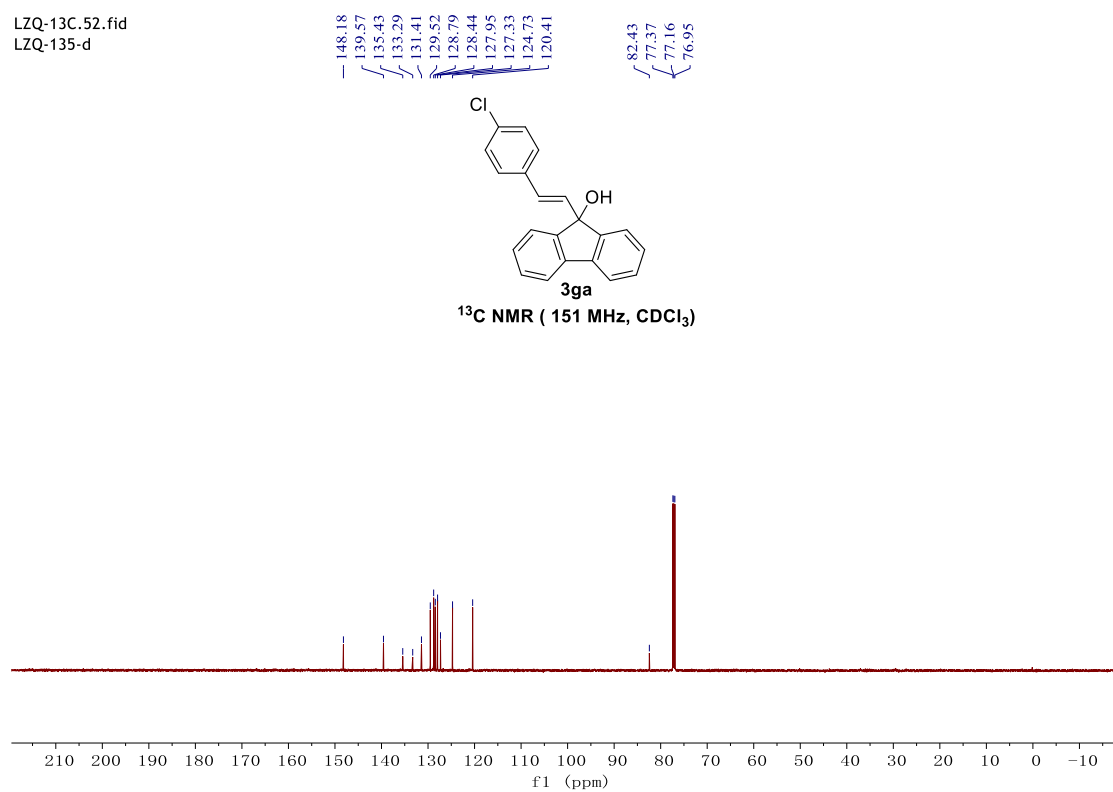

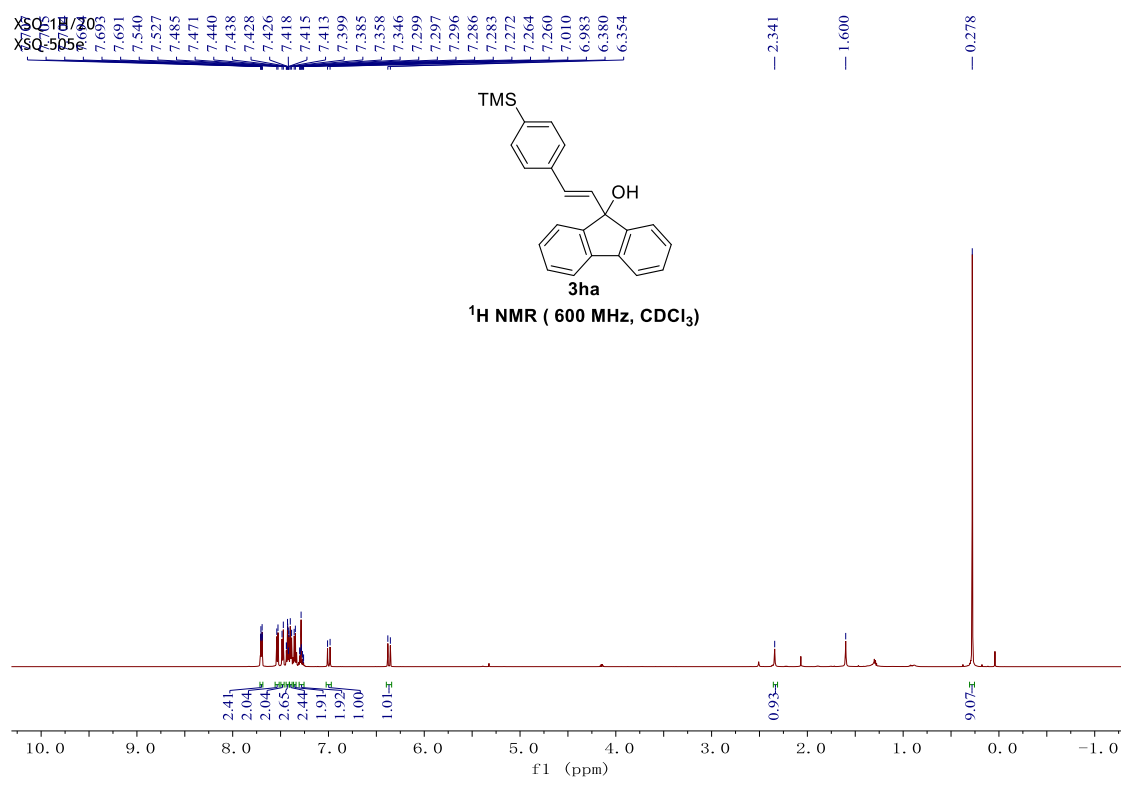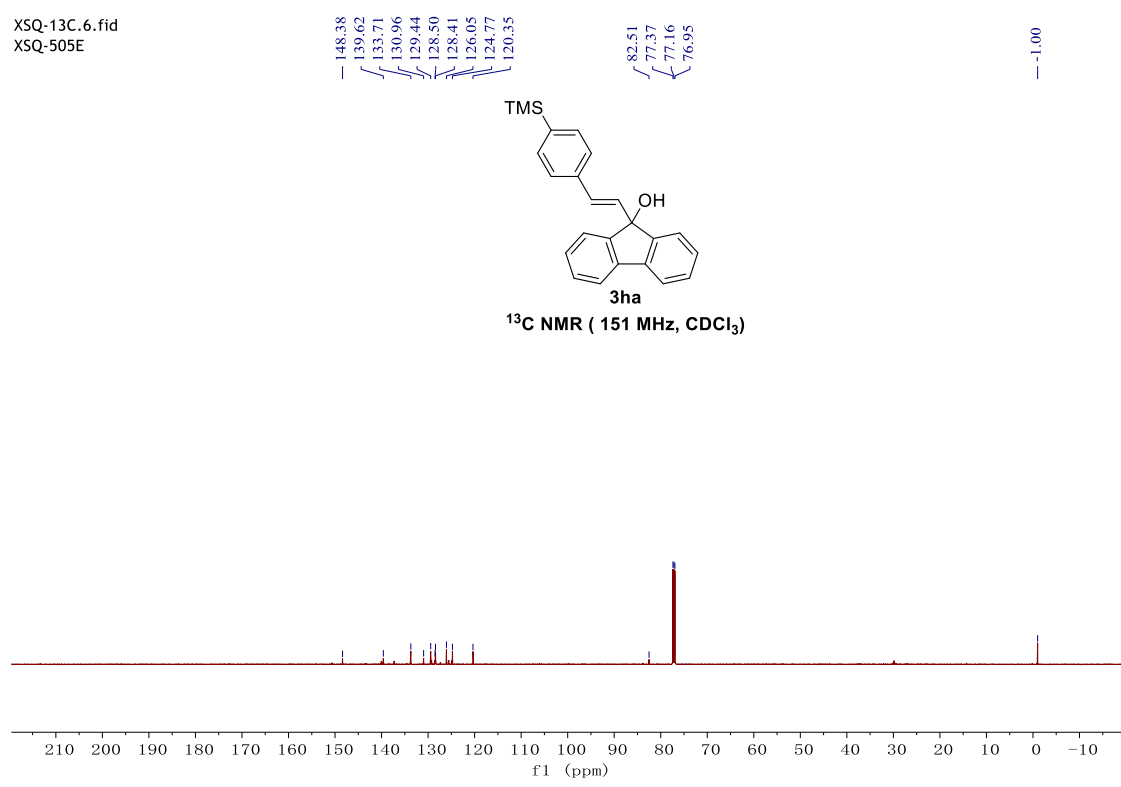

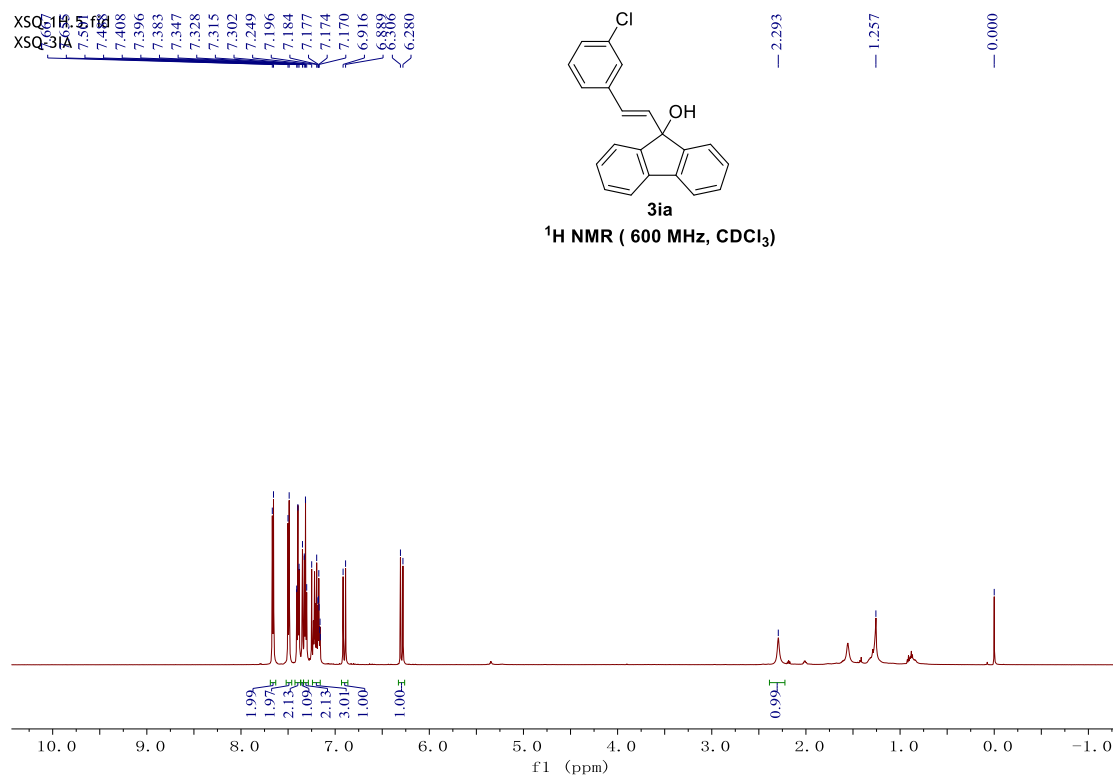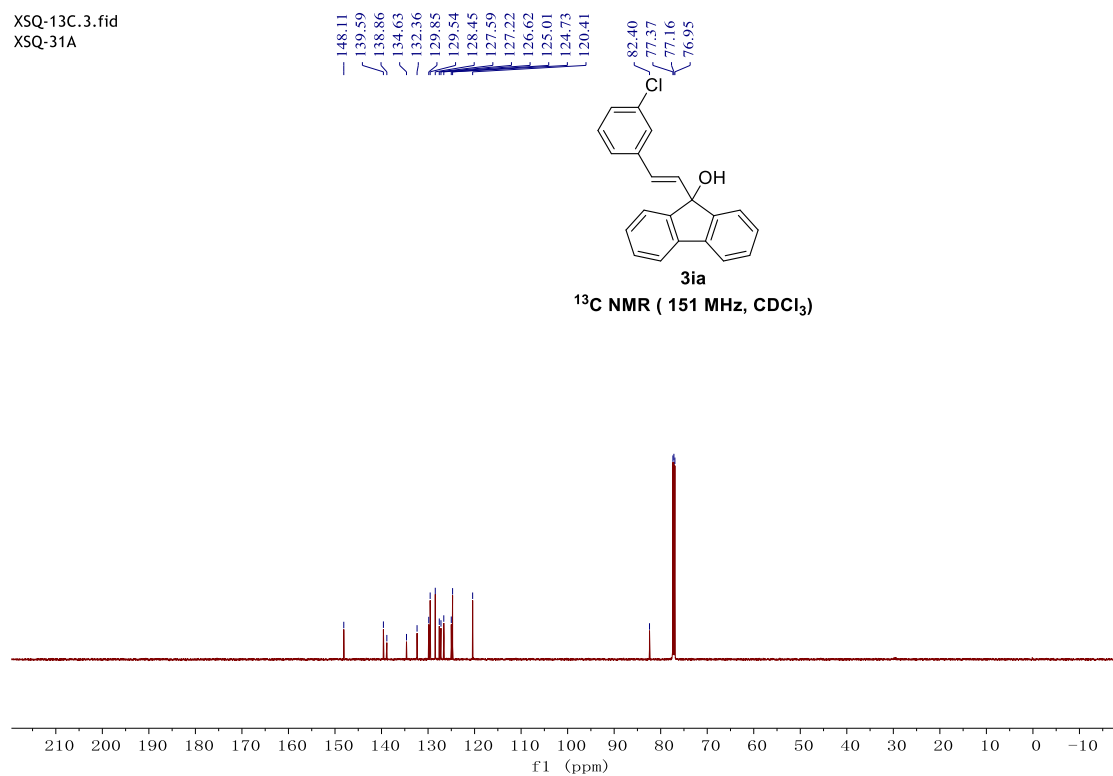

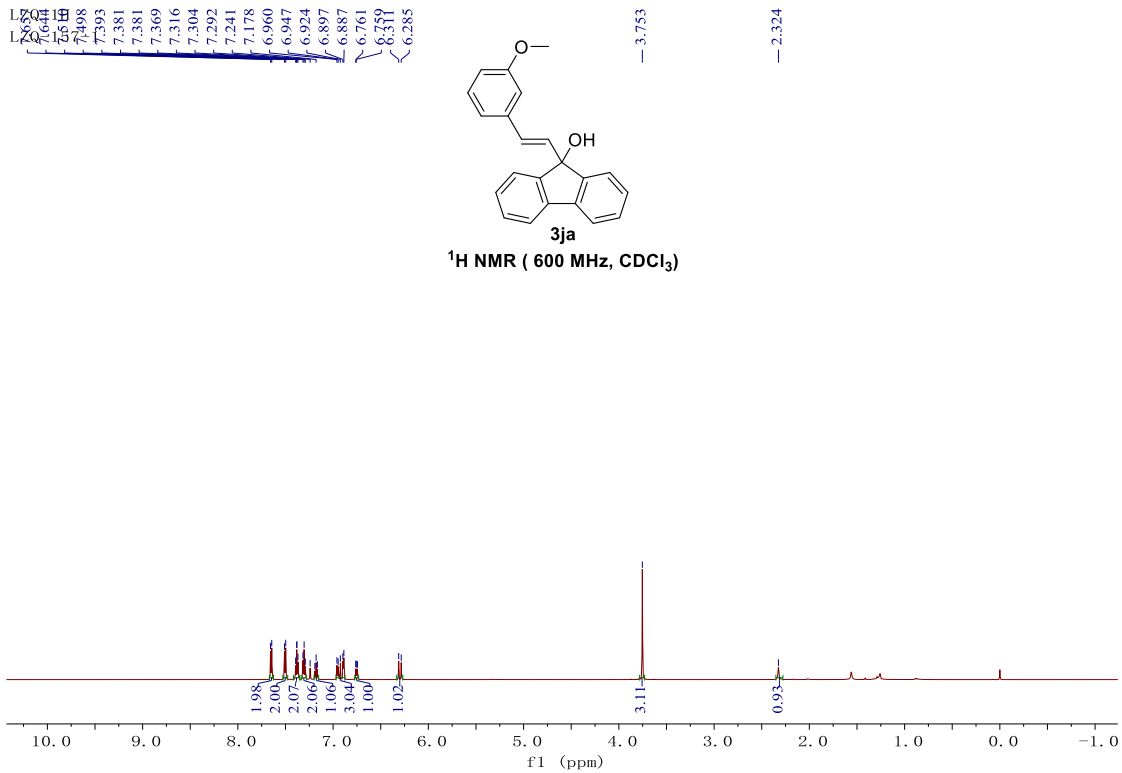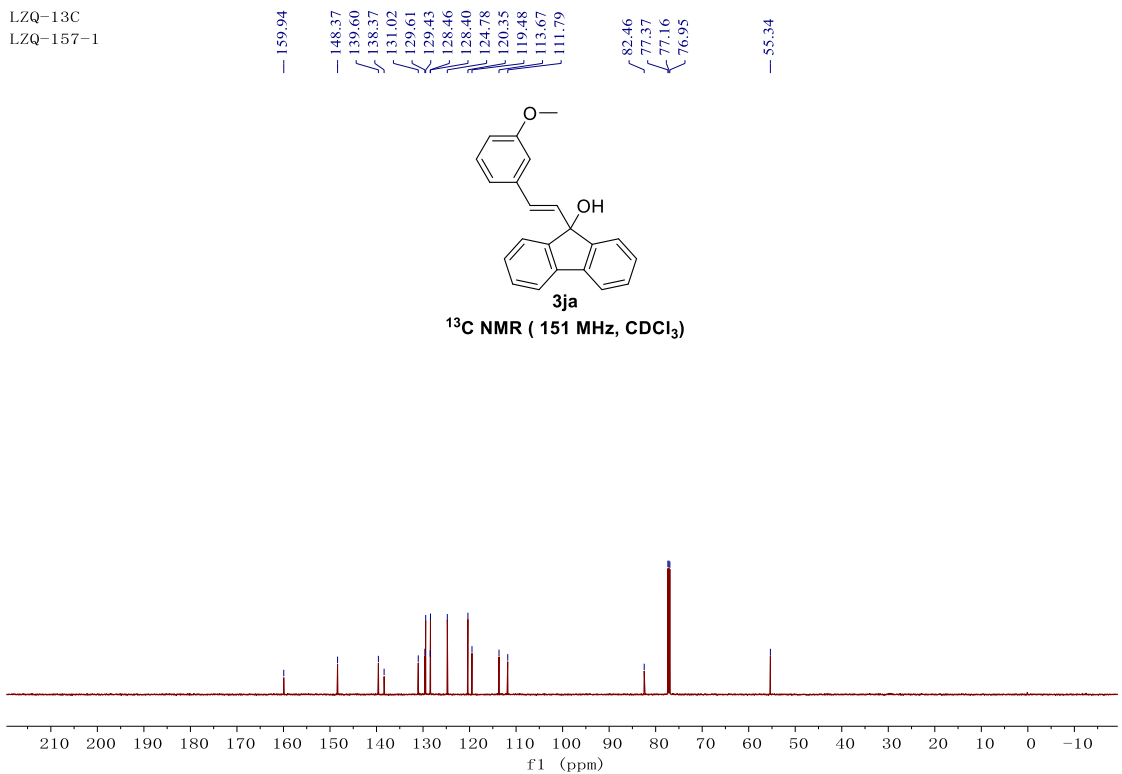

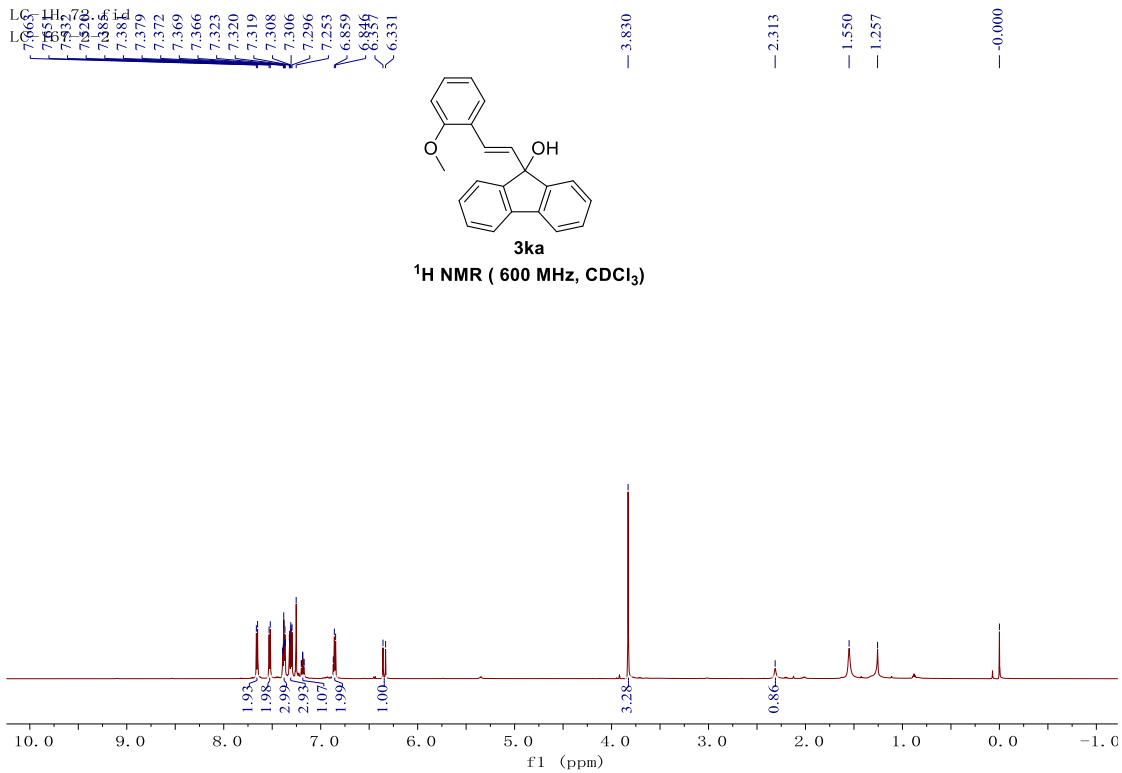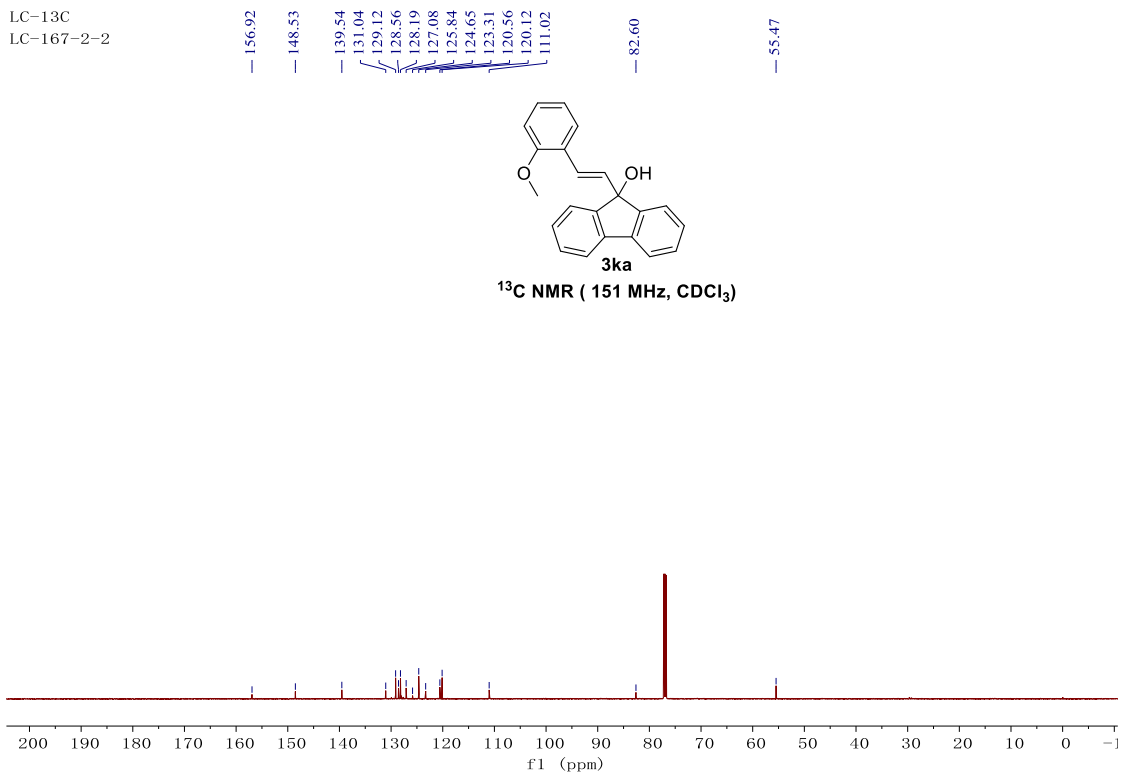

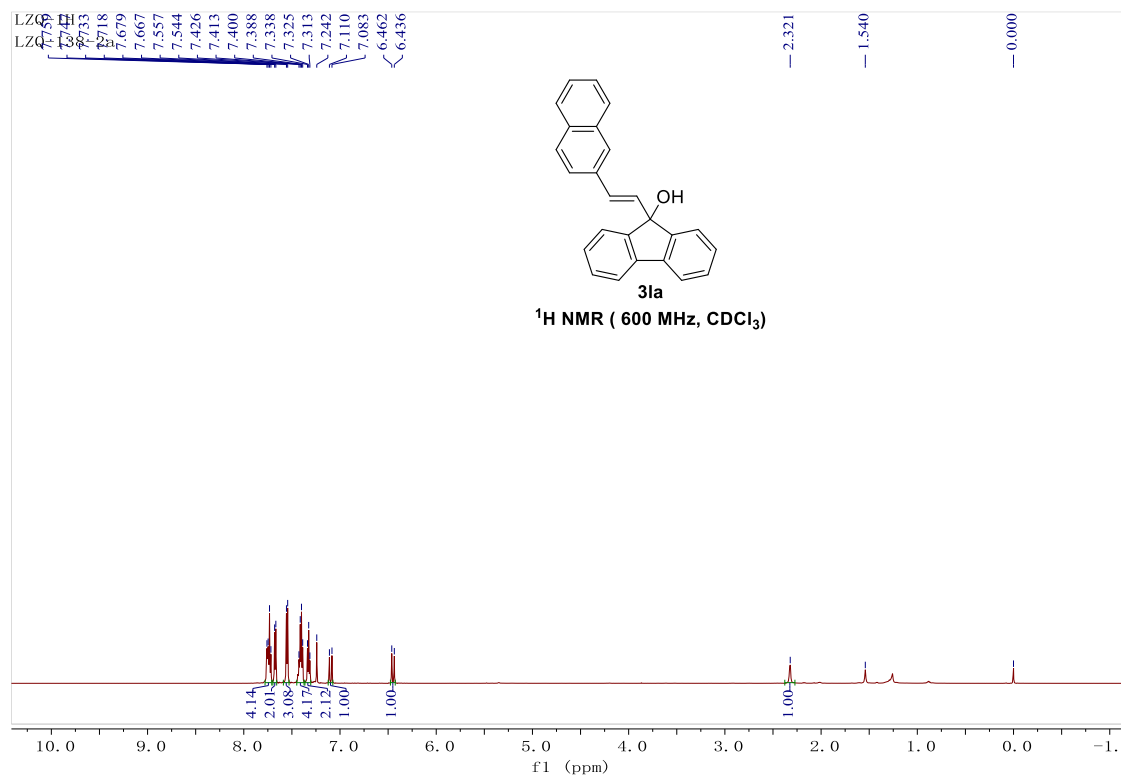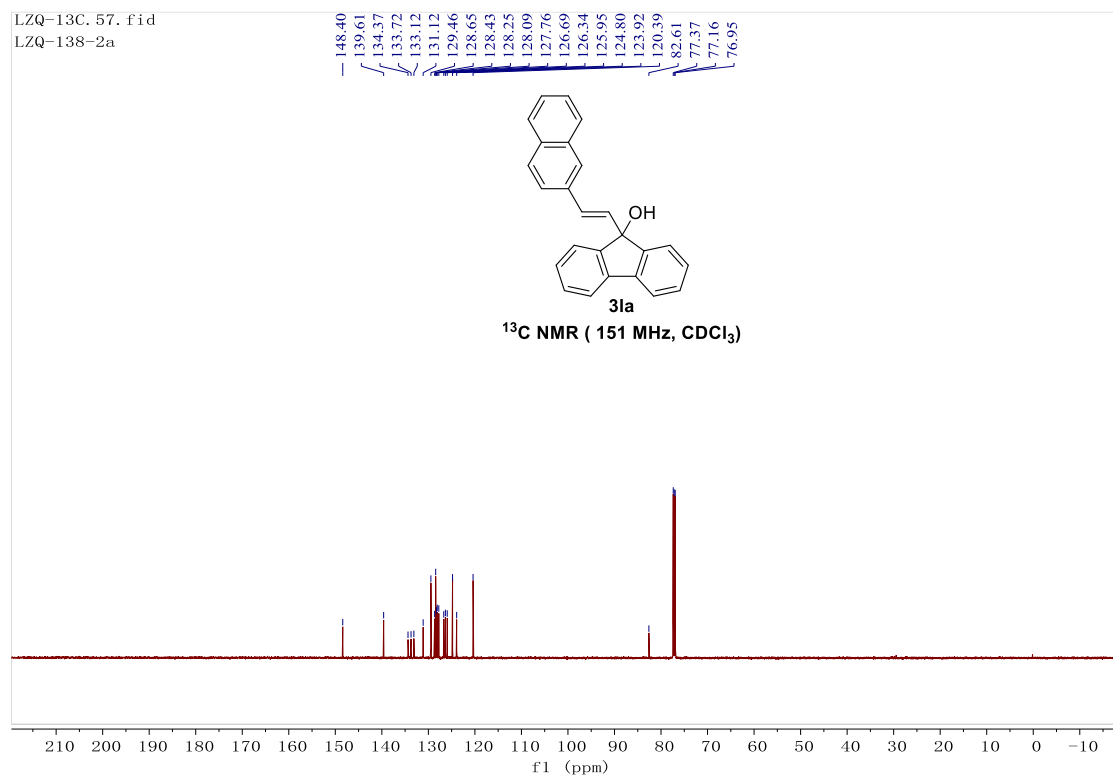

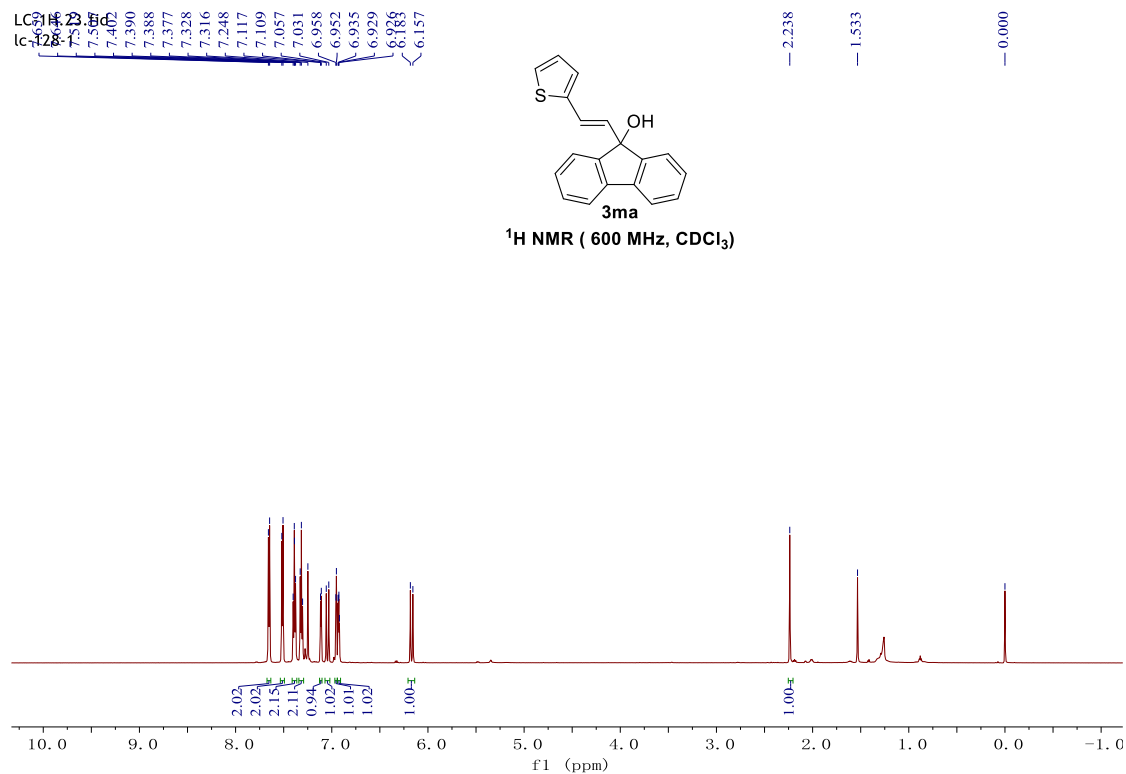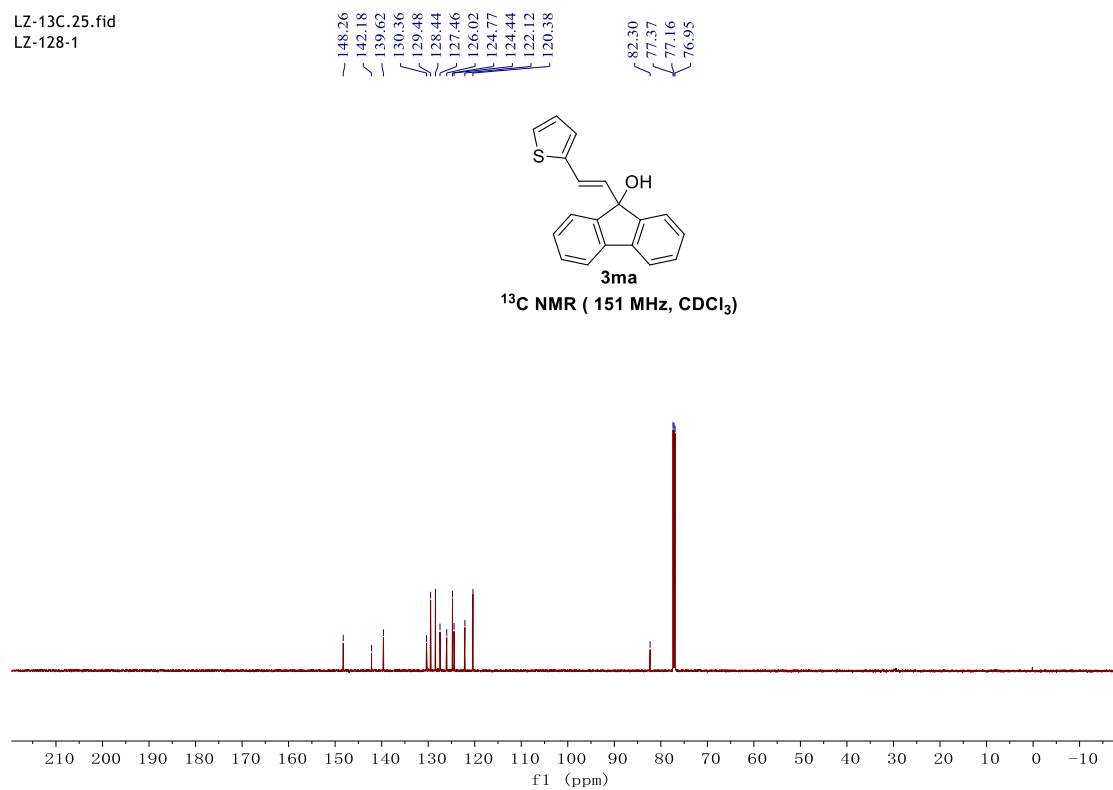



LZQ-1H.35.fid  
LZQ-161-4

8.470  
8.464  
7.662  
7.650  
7.602  
7.599  
7.589  
7.586  
7.576  
7.573  
7.532  
7.520  
7.395  
7.382  
7.370  
7.313  
7.301  
7.299  
7.287  
7.272  
7.257  
7.093  
7.091  
7.085  
7.083  
7.080  
7.079  
7.072  
7.070  
7.050  
7.024  
6.825  
6.799  
2.545  
1.613

0.000

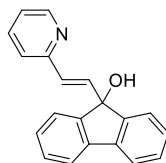

3na

<sup>1</sup>H NMR (600 MHz, CDCl<sub>3</sub>)

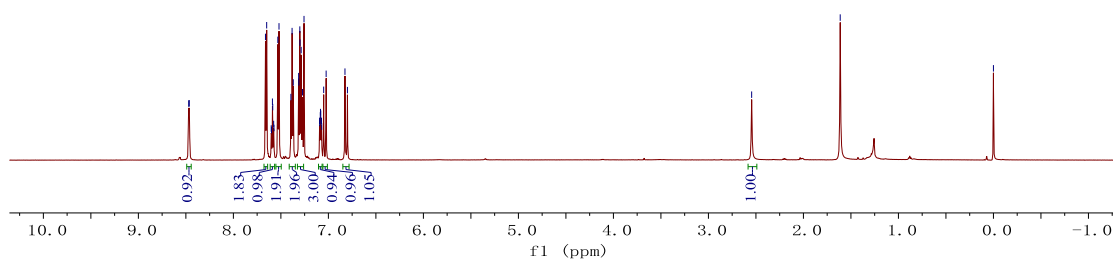

LZQ-13C.69.fid  
LZQ-160-4

155.52  
149.65  
148.13  
139.69  
136.56  
135.74  
129.45  
128.40  
128.34  
124.86  
122.23  
122.06  
120.55  
82.54  
77.37  
77.16  
76.95

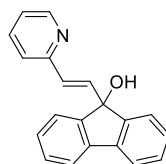

3na

<sup>13</sup>C NMR (151 MHz, CDCl<sub>3</sub>)

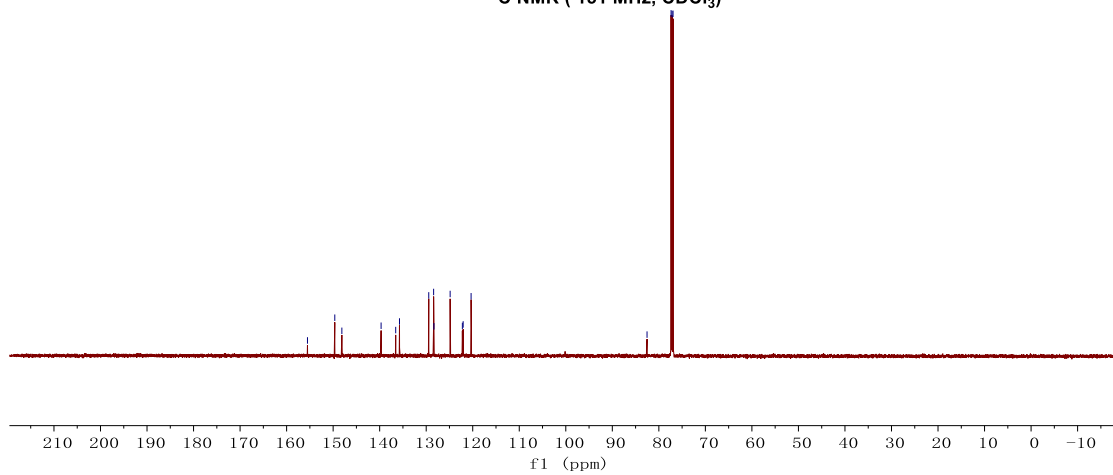

XSQ-1H.9.fid  
XSQ-505a1

7.666  
7.654  
7.515  
7.503  
7.405  
7.392  
7.380  
7.254  
6.648  
6.622  
5.955  
5.929  
4.308  
4.187  
4.177  
4.173  
4.071  
1.551  
1.258  
0.000

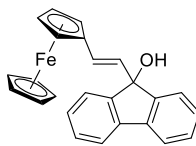

**30a**  
**<sup>1</sup>H NMR (600 MHz, CDCl<sub>3</sub>)**

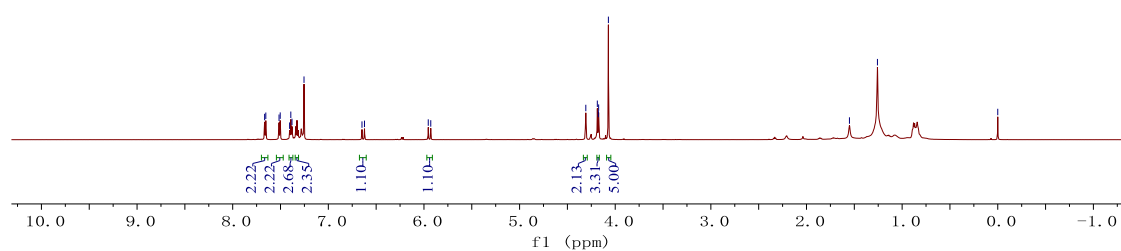

XSQ-13C.4.fid  
XSQ-505a-1

148.71  
139.56  
130.08  
129.30  
128.41  
128.34  
127.78  
126.32  
124.59  
120.34  
82.59  
77.37  
77.16  
76.95  
69.34  
68.90  
68.55  
67.13  
29.86

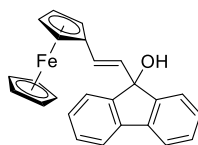

**30a**  
**<sup>13</sup>C NMR (151 MHz, CDCl<sub>3</sub>)**

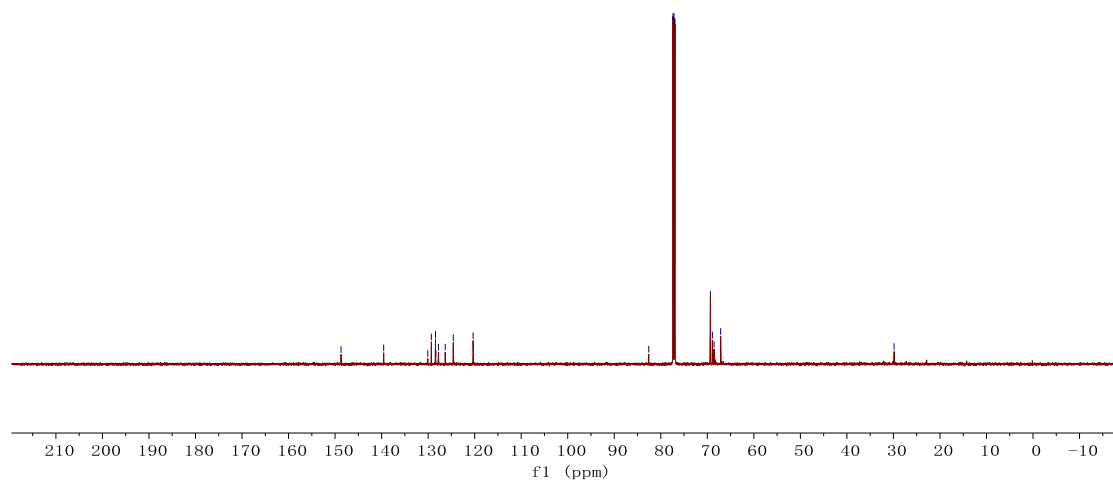

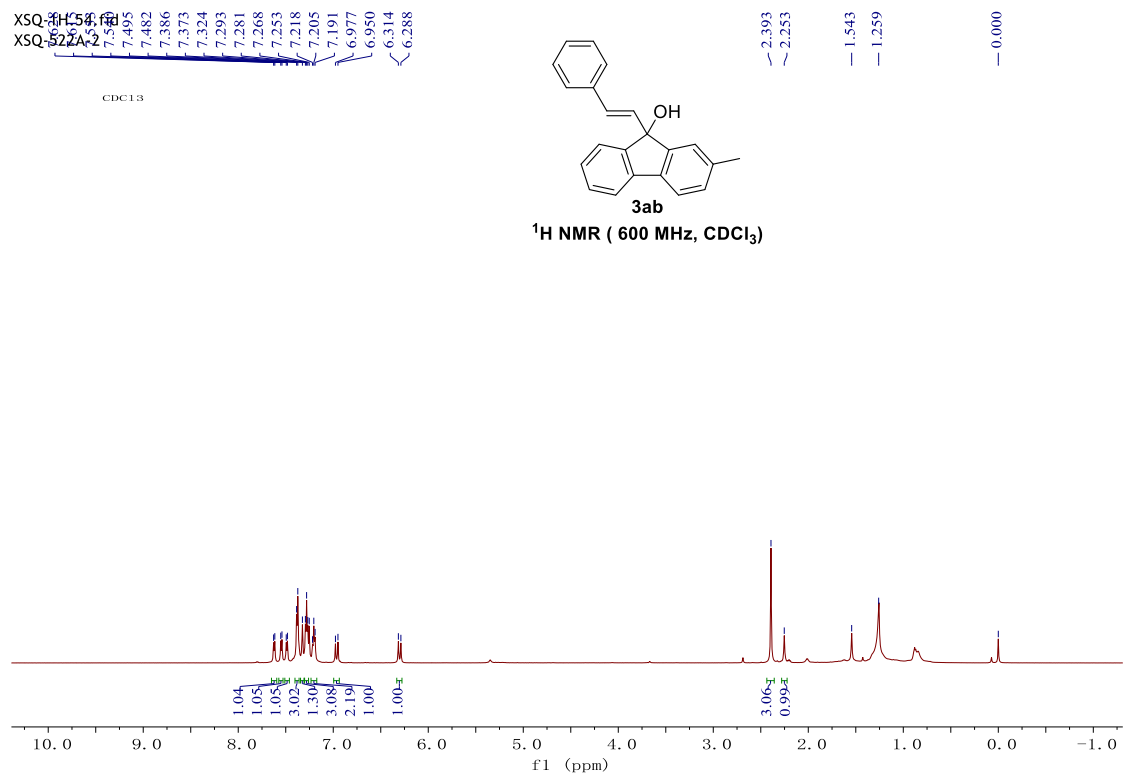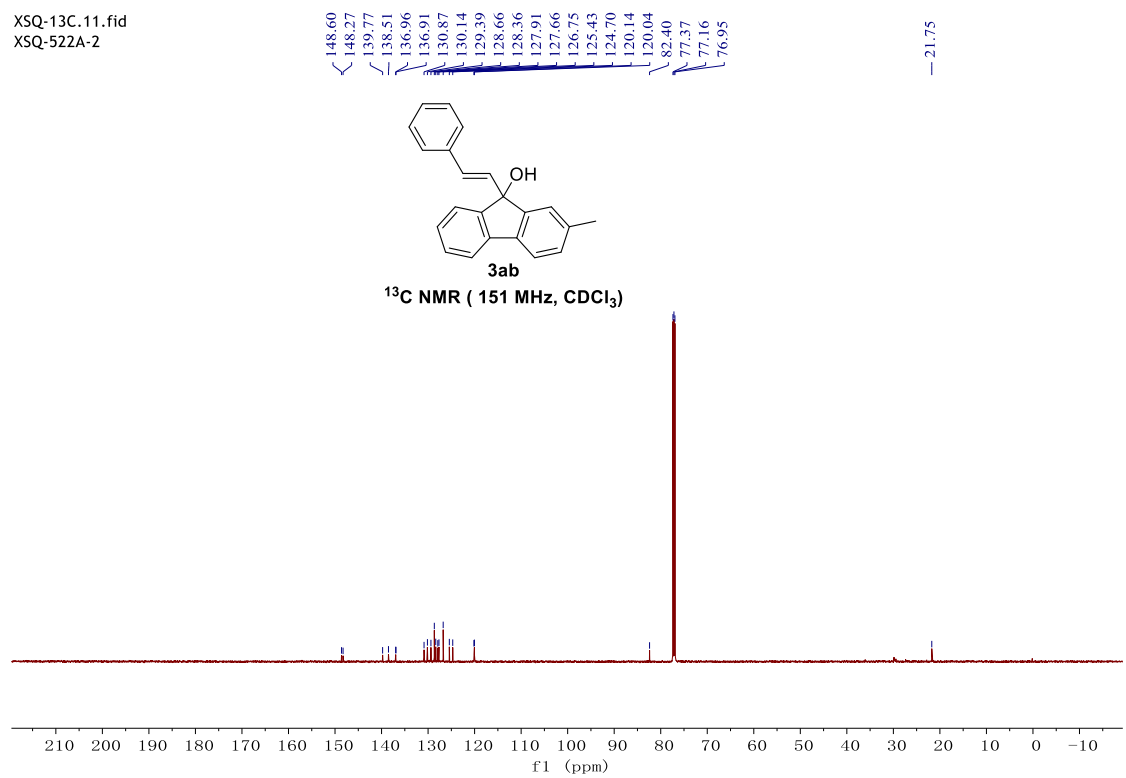

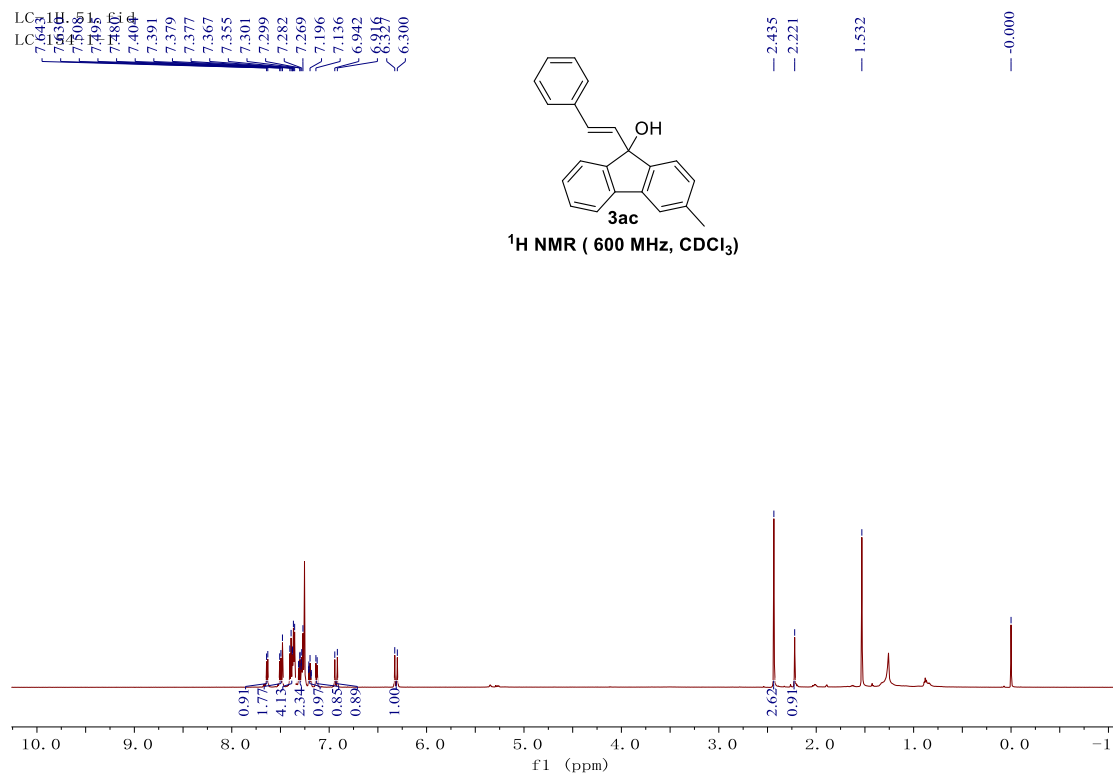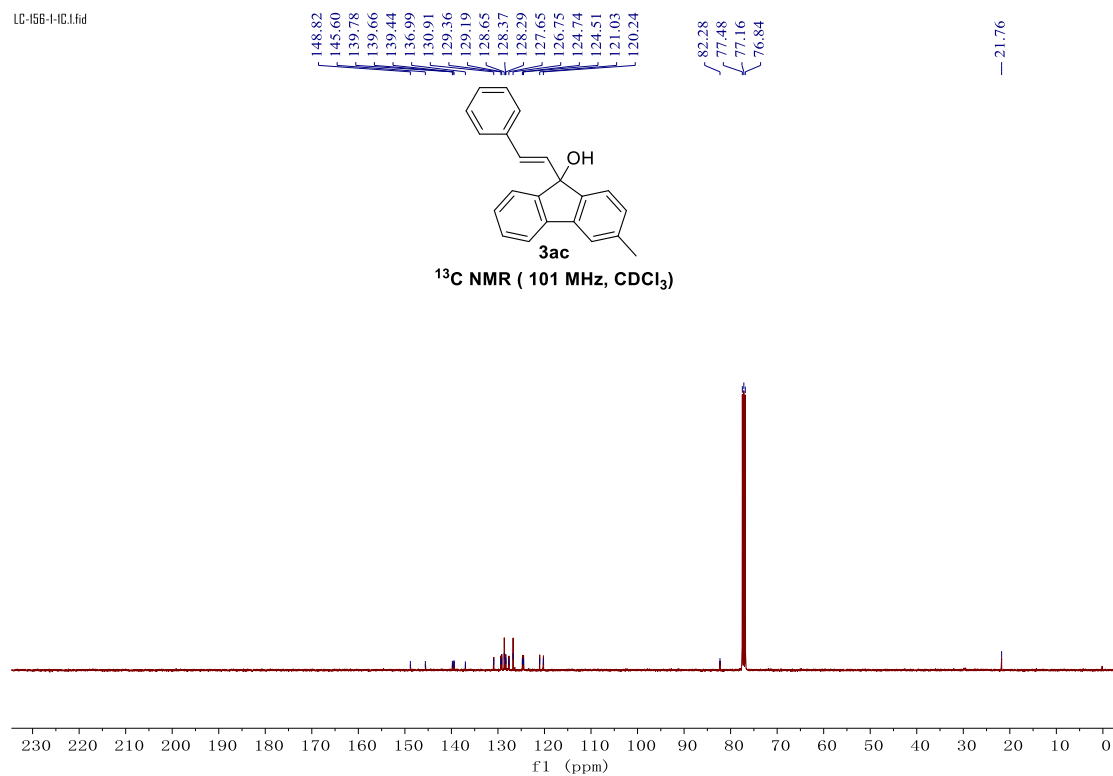

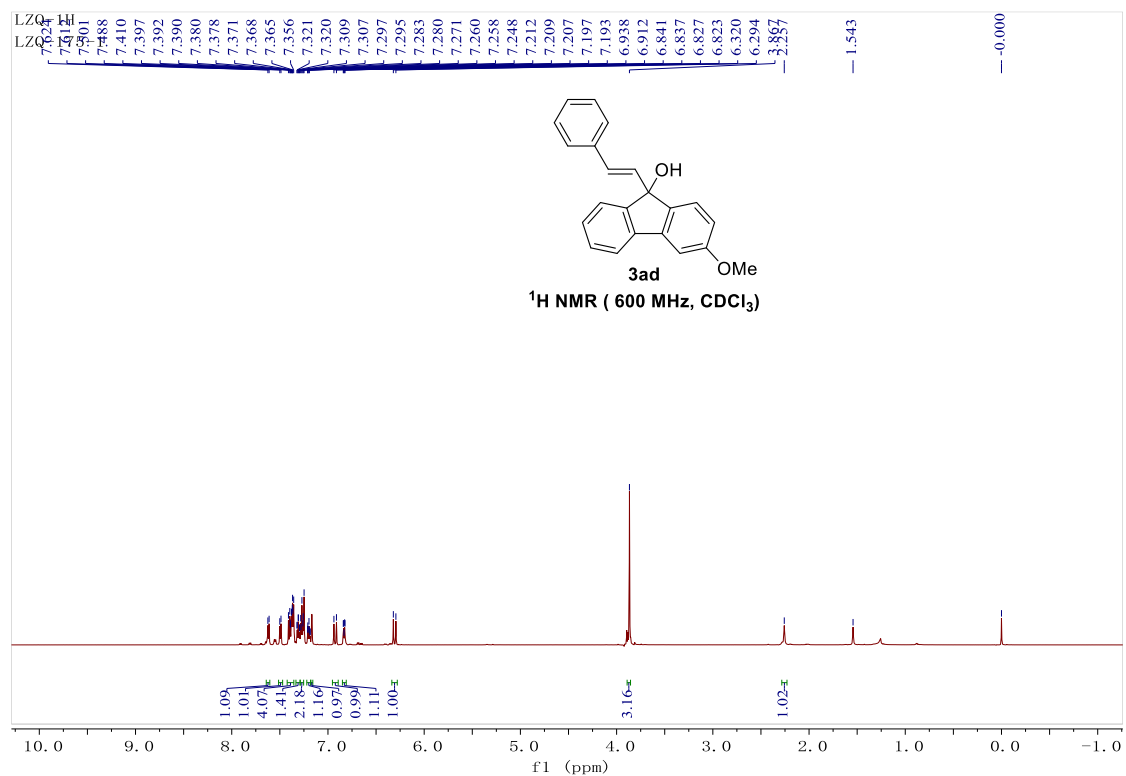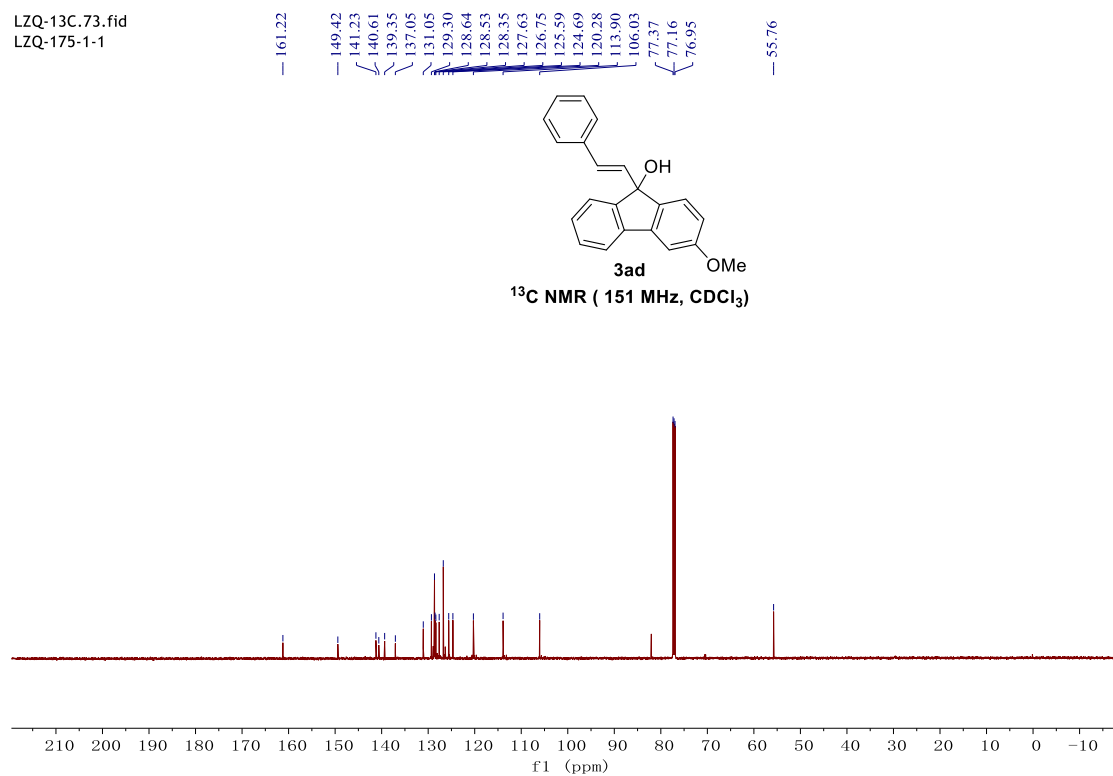

LZQ-1H.52.fid  
LZQ-176-1

8.553  
8.550  
8.544  
7.858  
7.846  
7.360  
7.358  
7.346  
7.306  
7.293  
7.280  
7.260  
7.247  
7.234  
7.223  
7.214  
7.005  
6.978  
6.232  
6.205

1.775

1.258

0.000

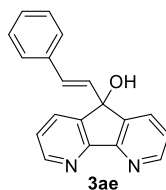

<sup>1</sup>H NMR (600 MHz, CDCl<sub>3</sub>)

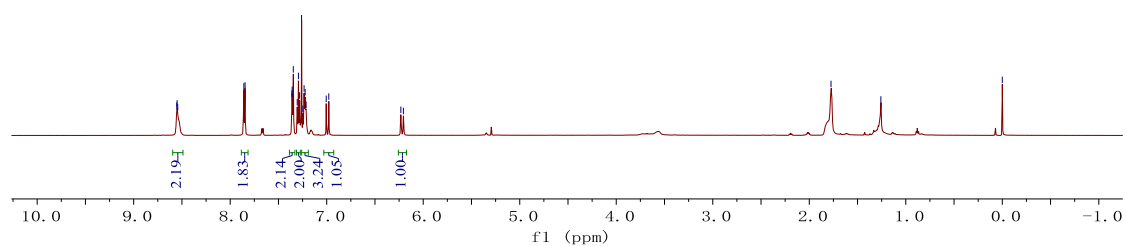

LZQ-13C.77.fid  
LZQ-176-1

157.32  
151.37  
143.66  
136.33  
132.54  
130.10  
128.79  
128.67  
128.17  
126.81  
124.02

78.74  
77.37  
77.16  
76.95

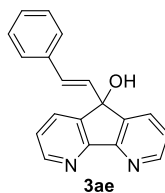

<sup>13</sup>C NMR (151 MHz, CDCl<sub>3</sub>)

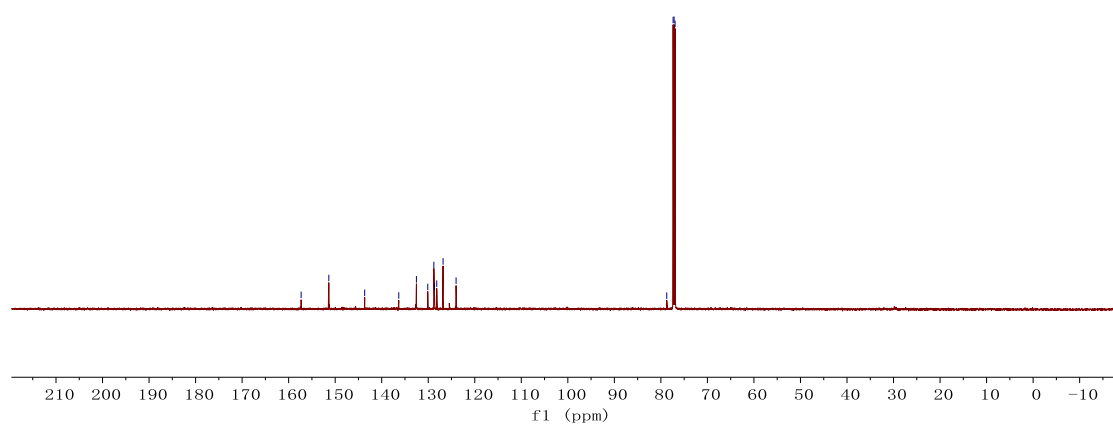

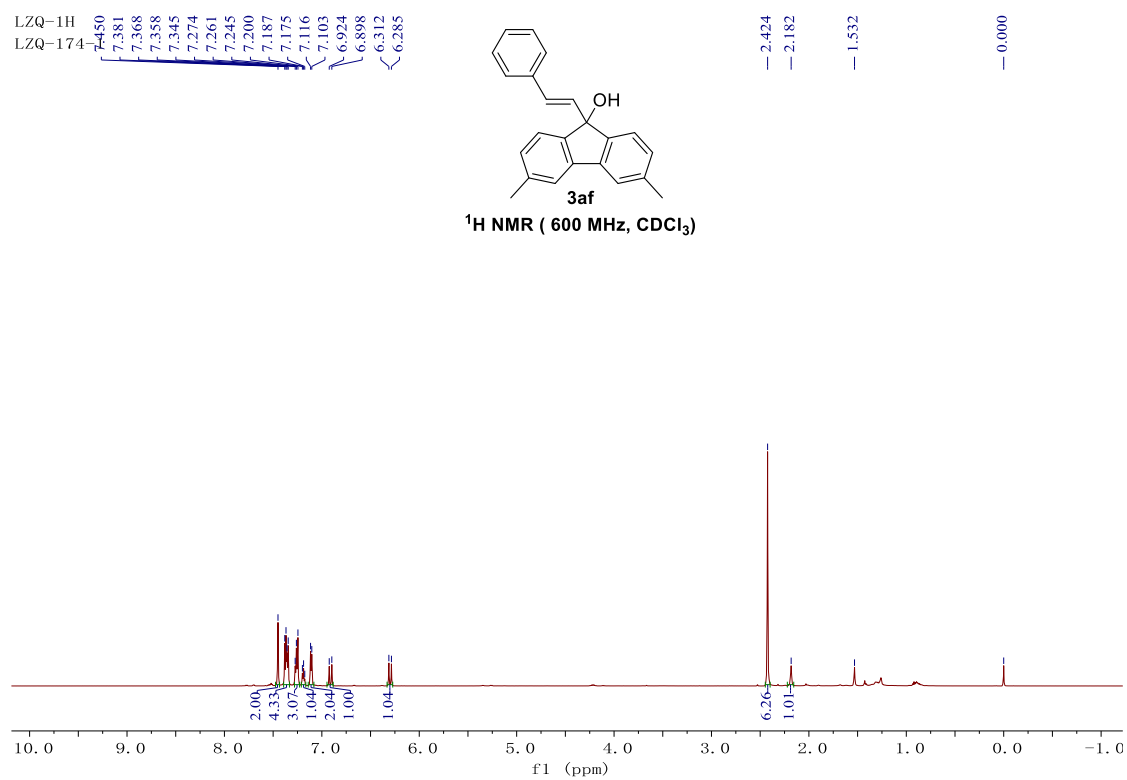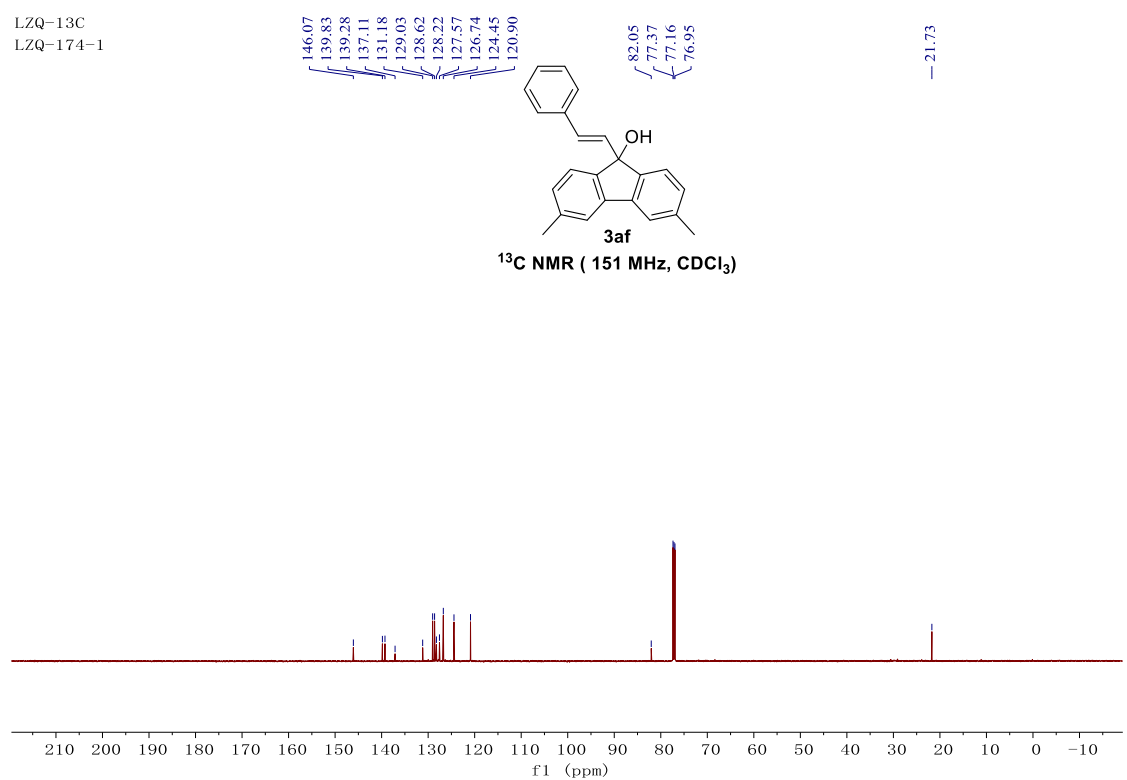

LZQ-1H.47.fid  
LZQ-176-2

7.455  
7.452  
7.441  
7.438  
7.383  
7.370  
7.292  
7.280  
7.267  
7.246  
7.024  
7.020

3.809  
3.807  
3.804

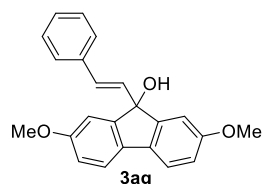

<sup>1</sup>H NMR ( 600 MHz, CDCl<sub>3</sub>)

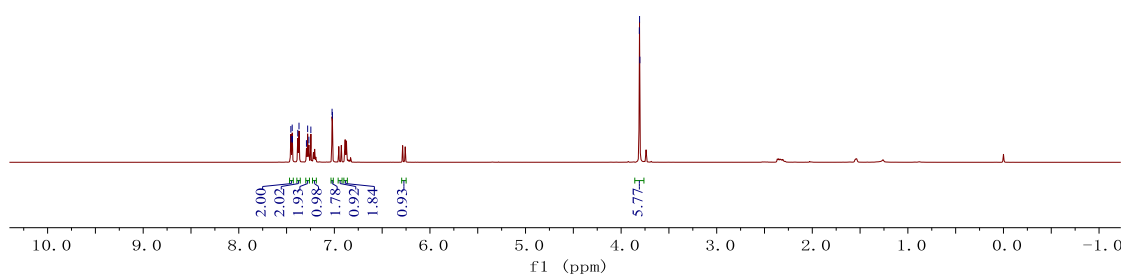

LZQ-13C.76.fid  
LZQ-176-2

159.68  
149.97  
136.98  
132.40  
130.93  
128.66  
128.55  
127.70  
126.80  
120.34  
115.39  
115.38  
110.32

82.33  
77.37  
77.16  
76.95

55.75

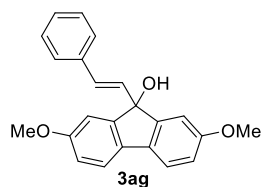

<sup>13</sup>C NMR ( 151 MHz, CDCl<sub>3</sub>)

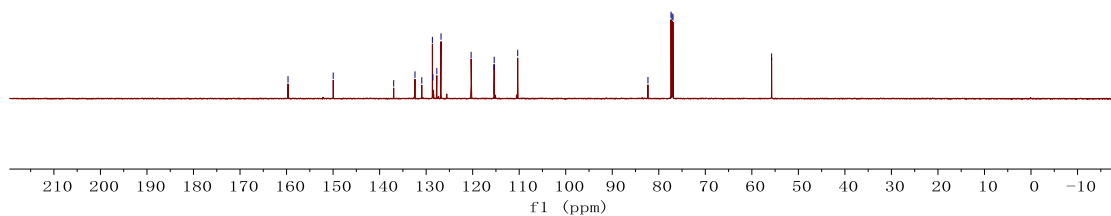



LC-1H.53.fid  
LC-157-3

7.489  
7.482  
7.475  
7.468  
7.384  
7.381  
7.369  
7.300  
7.287  
7.274  
7.255  
7.229  
7.217  
7.204  
7.045  
7.041  
6.931  
6.928  
6.918  
6.914  
6.263  
6.236  
4.249  
3.802  
2.277  
1.537  
-0.000

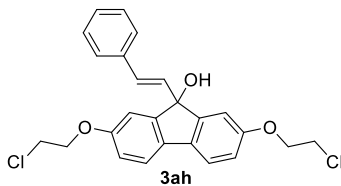

**<sup>1</sup>H NMR (600 MHz, CDCl<sub>3</sub>)**

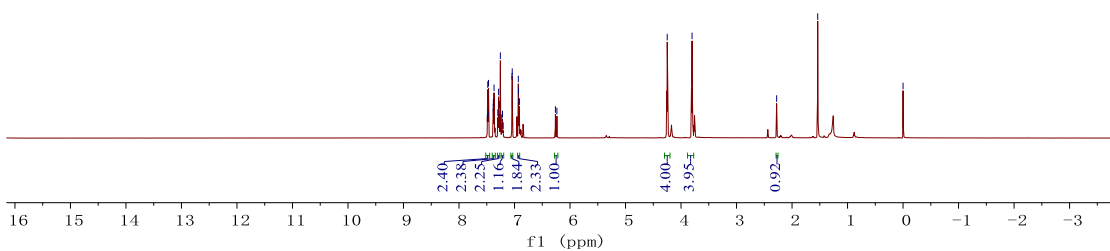

LY-13C.12.fid  
LY-57-3

158.41  
150.15  
136.82  
132.95  
130.57  
128.78  
128.71  
128.47  
127.83  
126.82  
125.52  
120.61  
116.24  
111.34  
82.29  
77.37  
77.16  
76.95  
68.68  
42.02

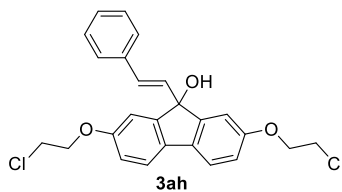

**<sup>13</sup>C NMR (151 MHz, CDCl<sub>3</sub>)**

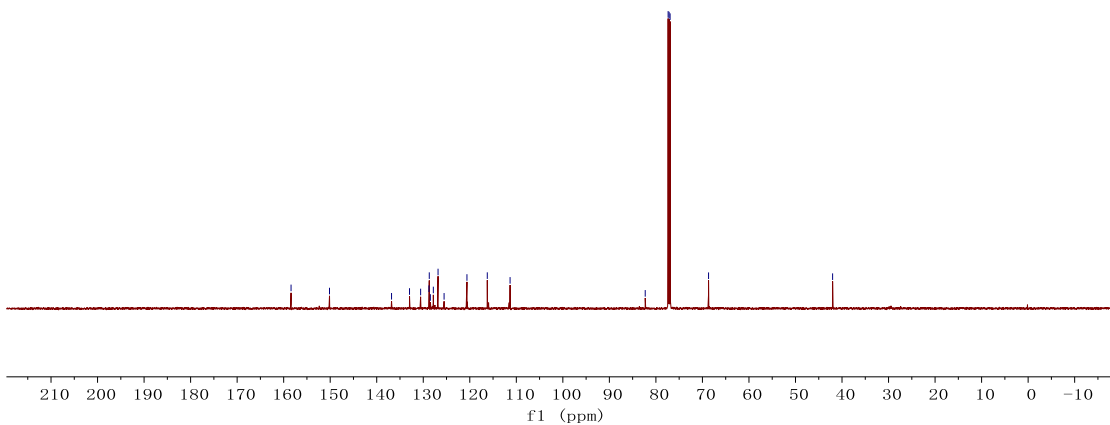

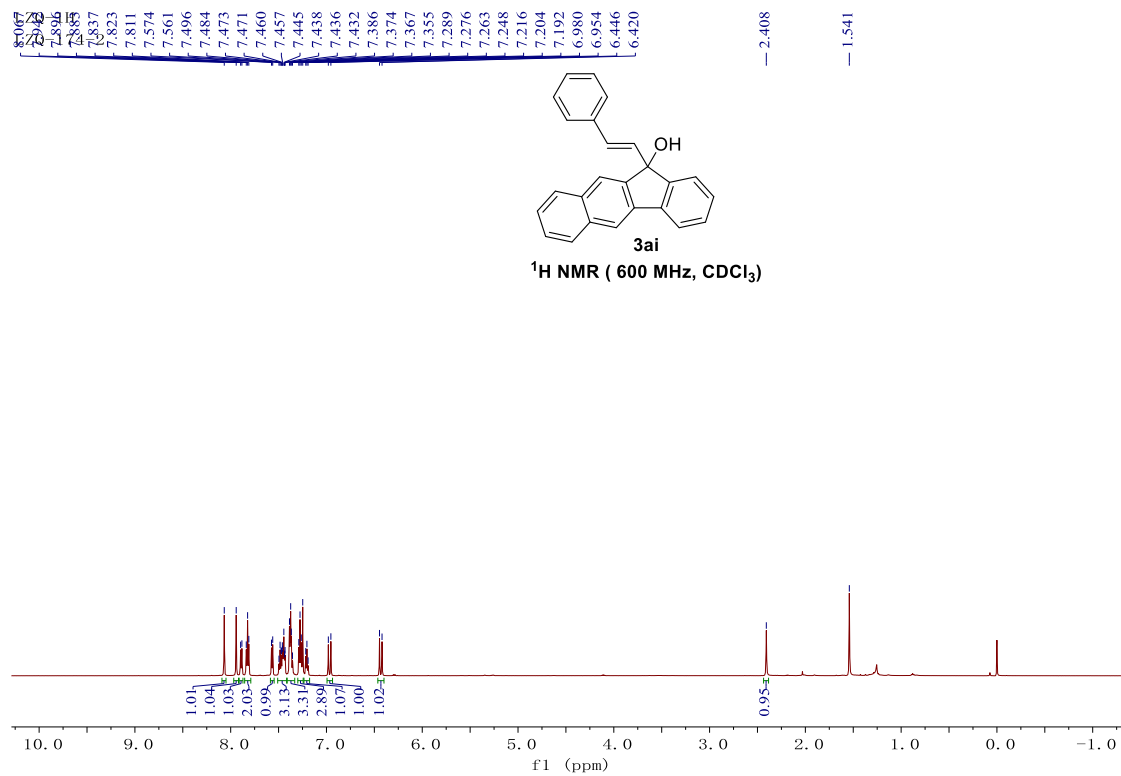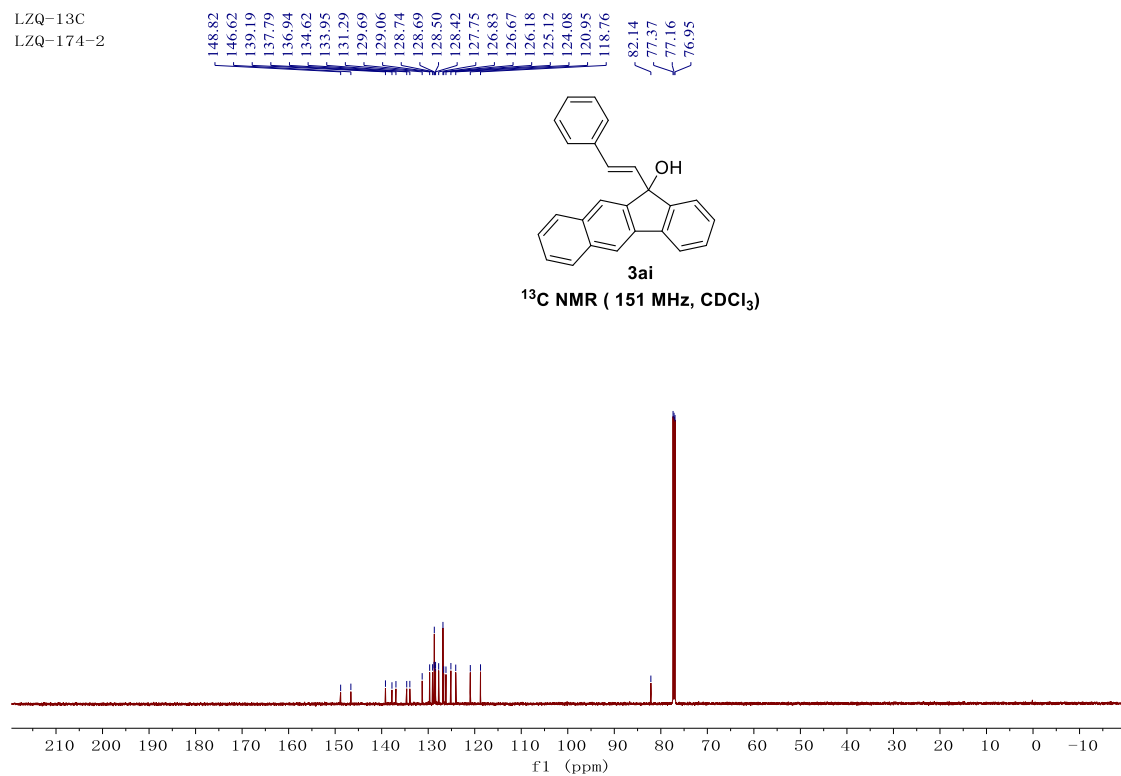

LZQ-1H  
LZQ-175-2

8.666  
8.652  
8.239  
8.226  
7.929  
7.916  
7.837  
7.824  
7.651  
7.638  
7.627  
7.583  
7.571  
7.549  
7.536  
7.524  
7.483  
7.481  
7.470  
7.457  
7.364  
7.350  
7.336  
7.324  
7.276  
7.264  
7.251  
7.239  
7.206  
7.194  
7.182  
7.026  
6.999  
6.306  
6.280  
2.322  
2.310  
2.297  
1.529

-0.000

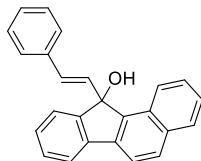

3aj

<sup>1</sup>H NMR (600 MHz, CDCl<sub>3</sub>)

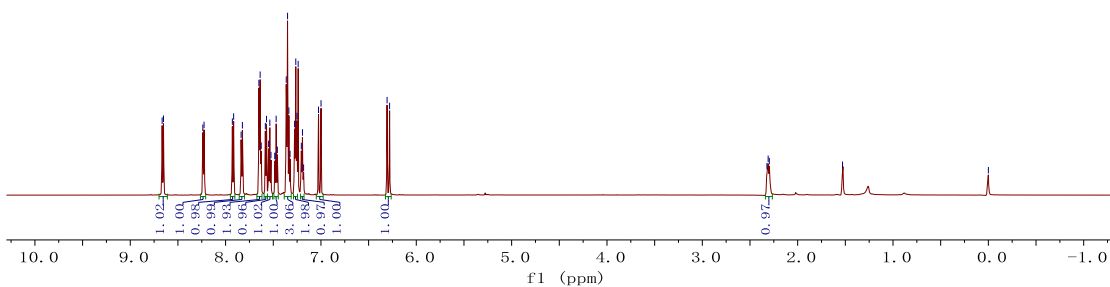

LZQ-13C  
LZQ-175-2

149.56  
147.00  
140.65  
136.99  
135.00  
134.39  
130.54  
129.52  
128.95  
128.66  
127.70  
127.62  
127.19  
126.76  
126.09  
124.61  
124.24  
123.42  
122.10  
82.30  
77.37  
77.16  
76.95

3aj

<sup>13</sup>C NMR (151 MHz, CDCl<sub>3</sub>)

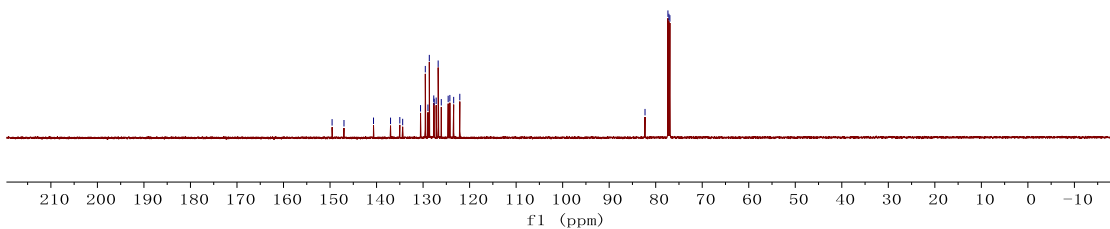

XSQ-1H.94.fid  
XSQ-360C

7.421  
7.419  
7.409  
7.407  
7.405  
7.318  
7.305  
7.303  
7.292  
7.253  
7.230  
7.228  
7.226  
7.219  
7.216  
7.213  
7.204

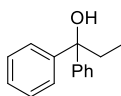

6aa

<sup>1</sup>H NMR ( 600 MHz, CDCl<sub>3</sub>)

2.340  
2.328  
2.316  
2.304  
2.065  
1.555  
1.415  
1.293  
0.894  
0.882  
0.870  
-0.000

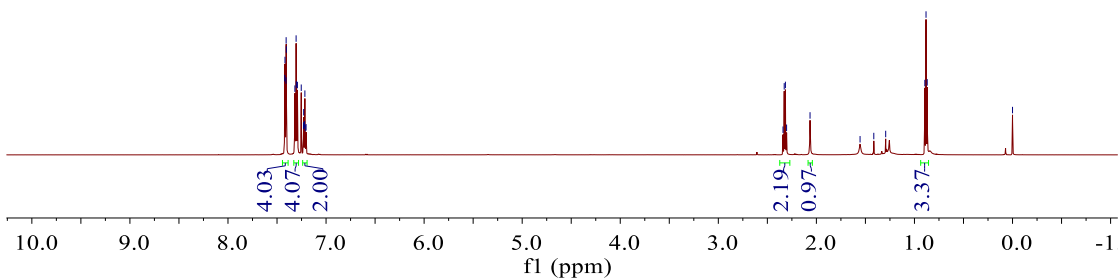

XSQ-13C. 5. fid  
XSQ-360C

147.06  
128.25  
126.90  
126.25

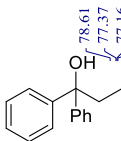

6aa

<sup>13</sup>C NMR ( 151 MHz, CDCl<sub>3</sub>)

78.61  
77.37  
77.16  
76.95  
34.60  
8.29

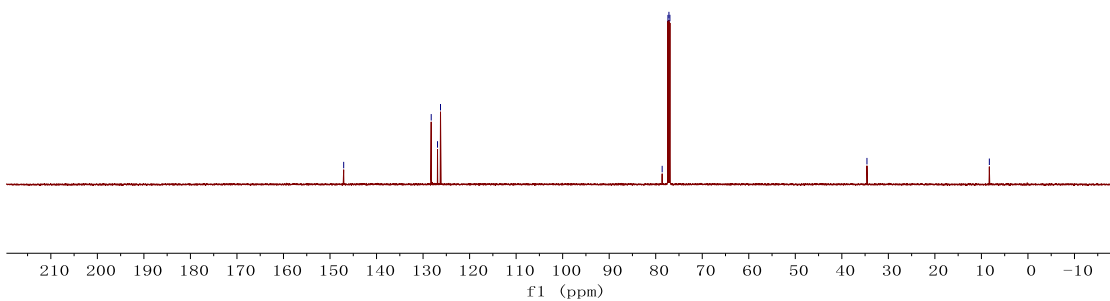

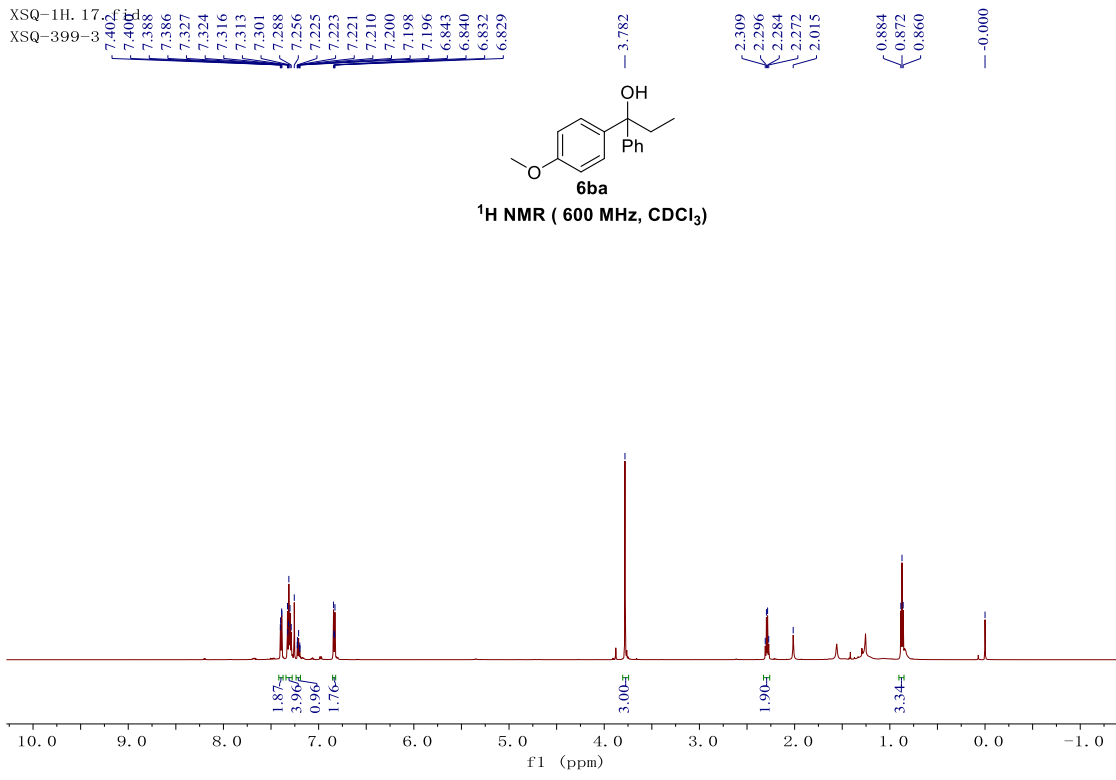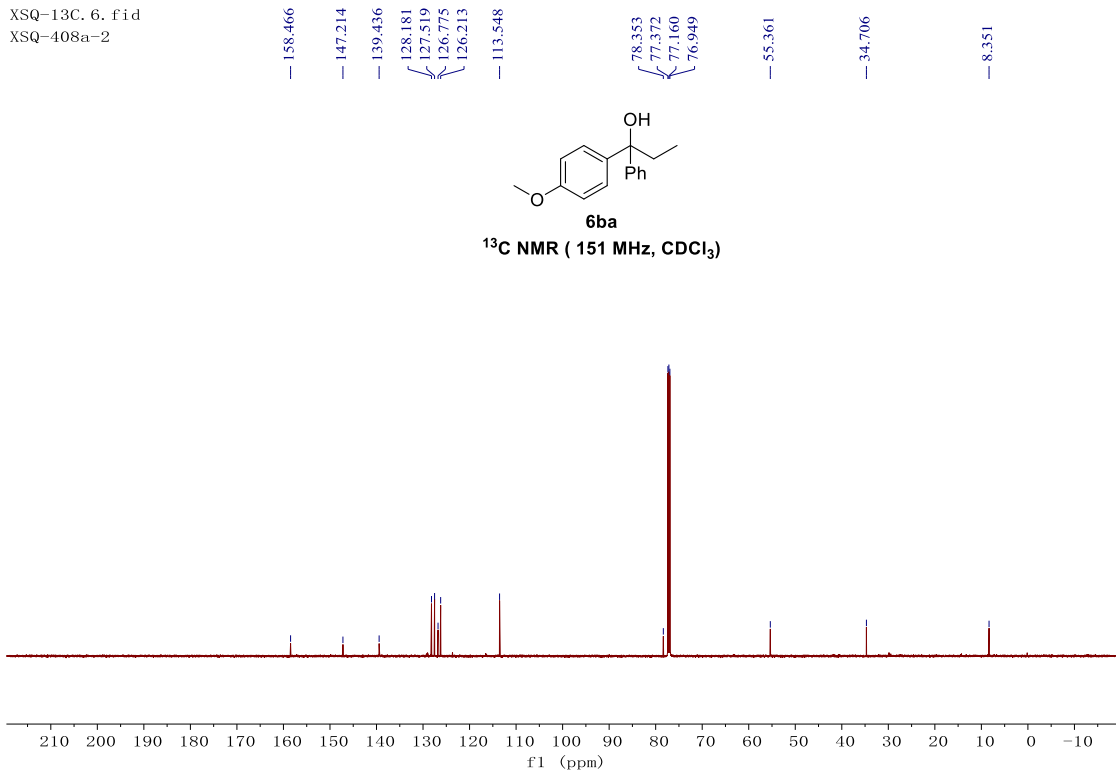

XSQ-1H.4.fid  
XSQ-399d-2

7.561  
7.557  
7.546  
7.539  
7.528  
7.524  
7.416  
7.404  
7.338  
7.325  
7.312  
7.254  
7.244  
7.232  
2.381  
2.368  
2.357  
2.349  
2.345  
2.337  
2.332  
2.324  
2.320  
2.312  
2.301  
2.289  
2.113  
-1.562  
0.898  
0.885  
0.873

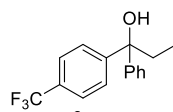

6ca

<sup>1</sup>H NMR (600 MHz, CDCl<sub>3</sub>)

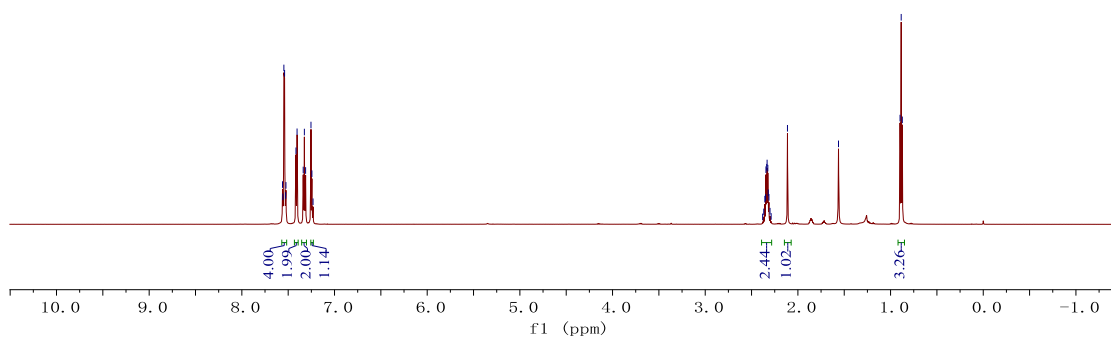

XSQ-13C.2.fid  
XSQ-399d-2

150.92  
146.41  
129.16  
128.95  
128.54  
127.39  
126.58  
126.19  
125.26  
125.21  
125.19  
125.16  
125.14  
123.46  
78.42  
77.37  
77.16  
76.95  
34.51  
8.12

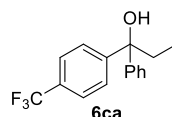

6ca

<sup>13</sup>C NMR (151 MHz, CDCl<sub>3</sub>)

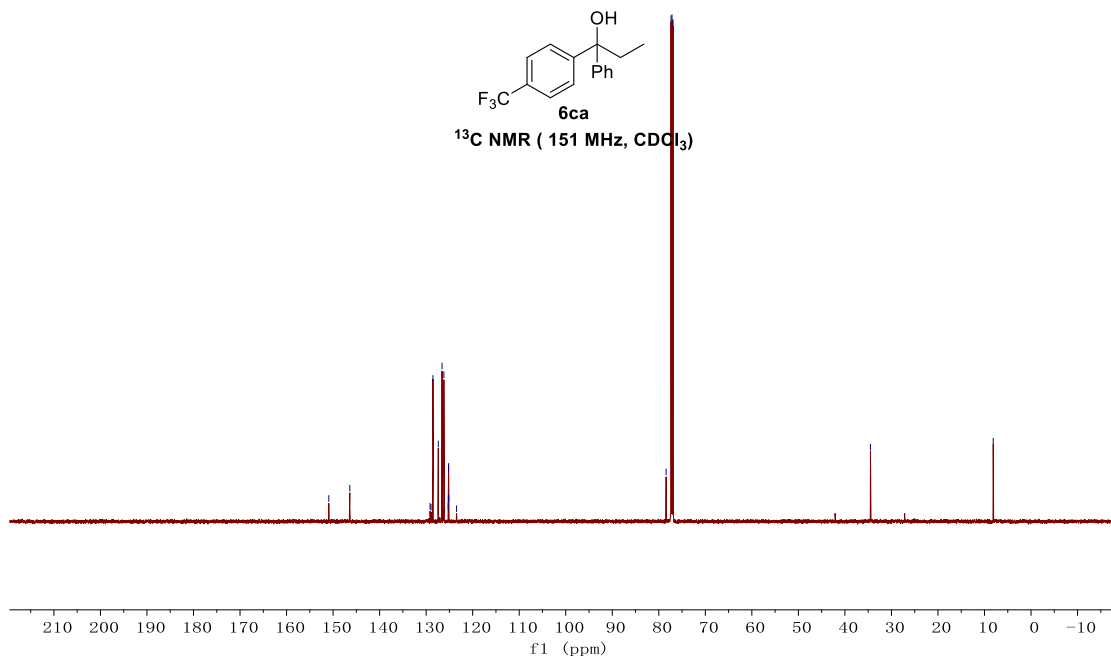

XSQ-19F.3.fid  
XSQ-399d-2

-62.456

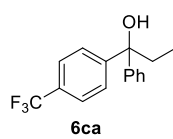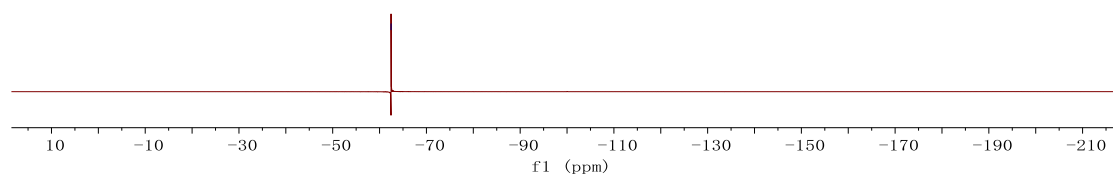

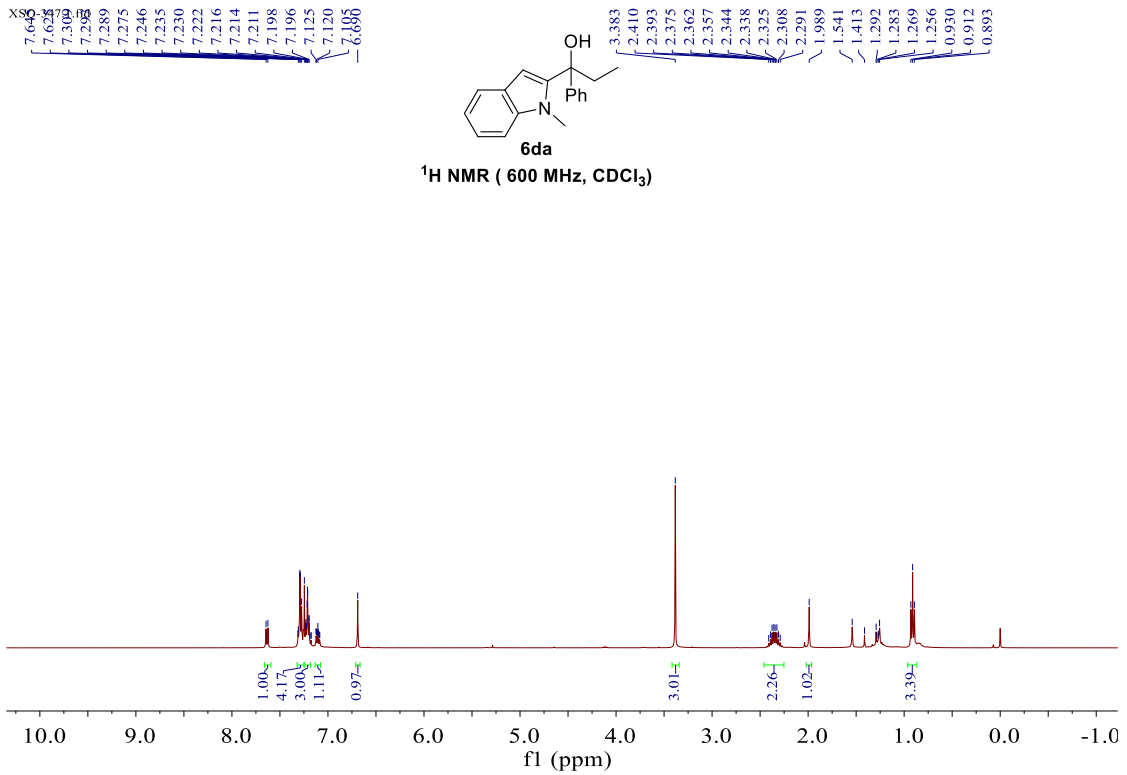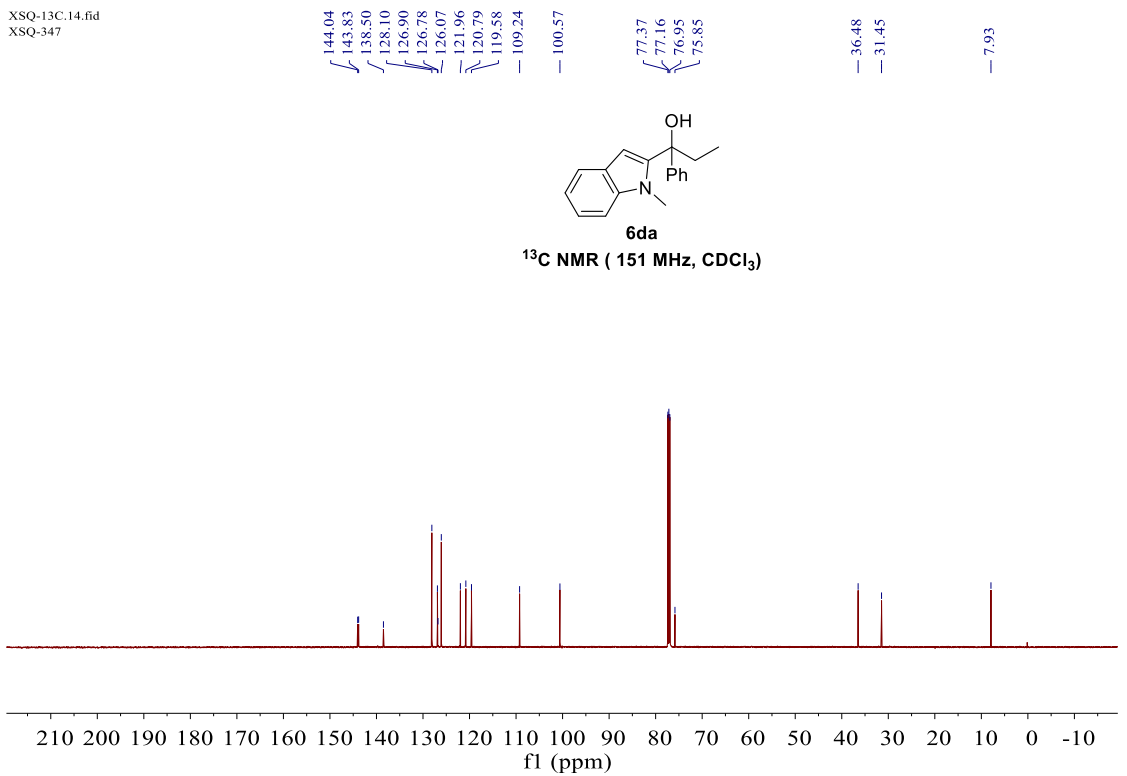



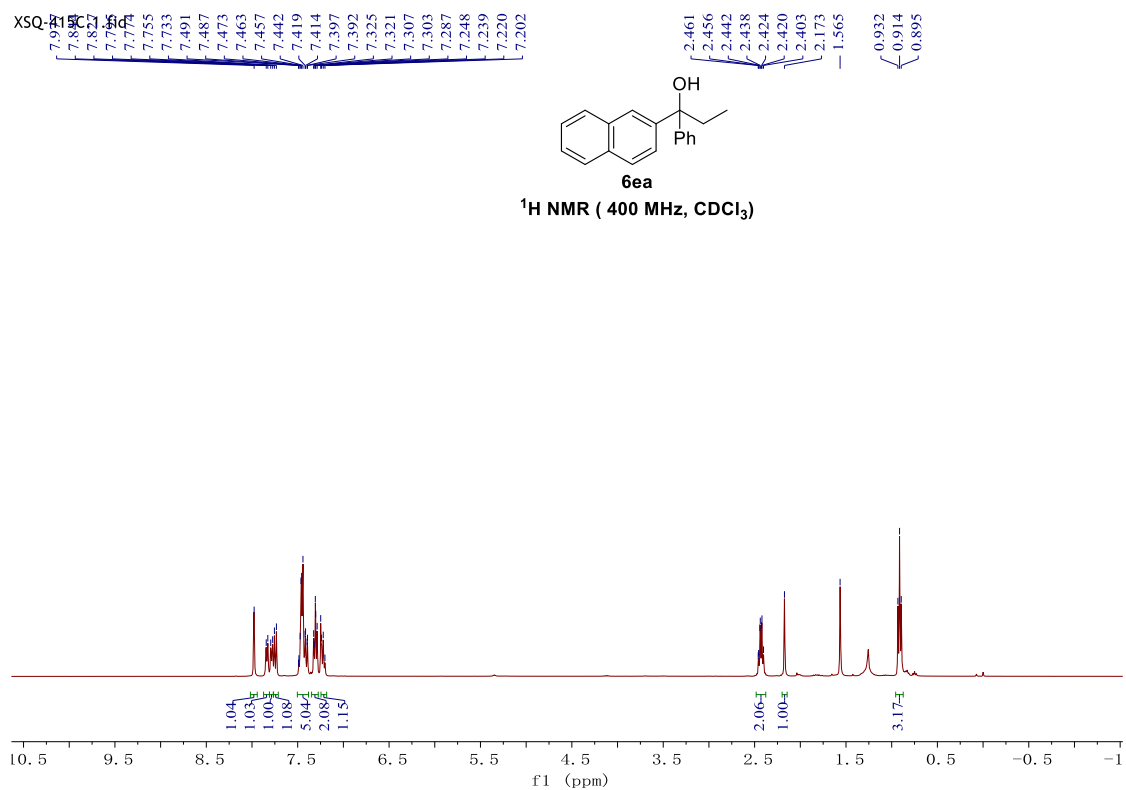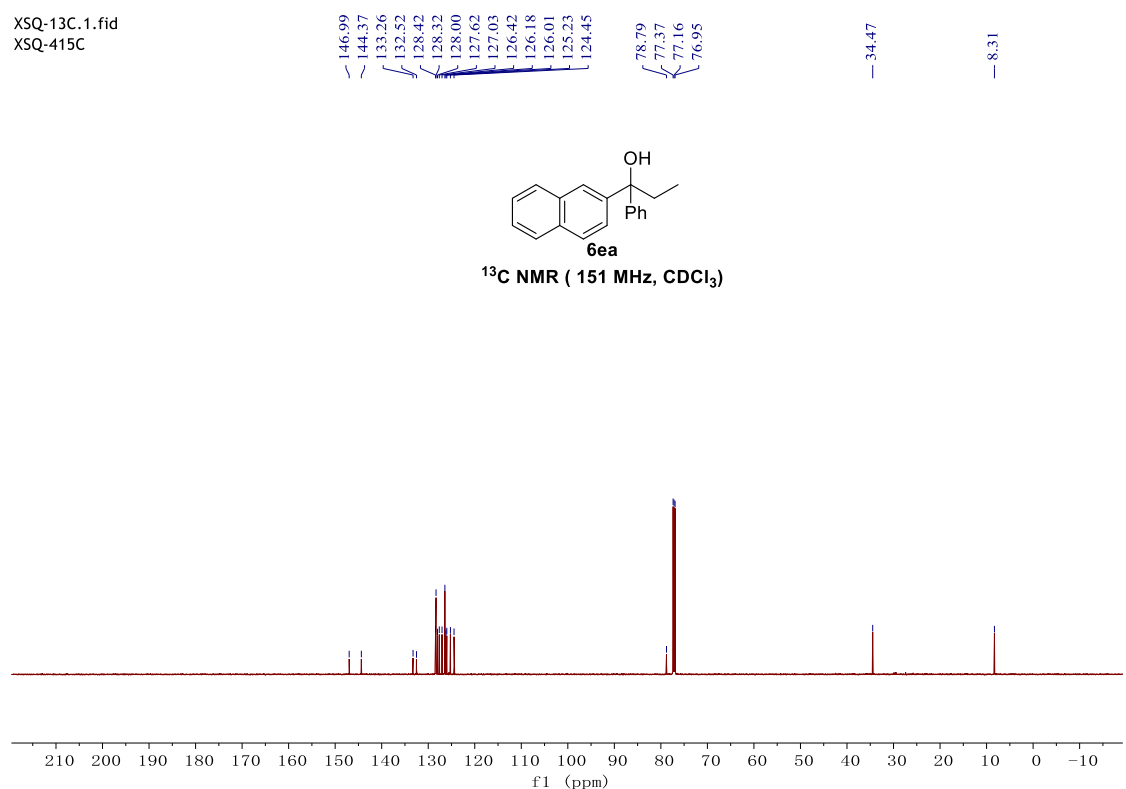

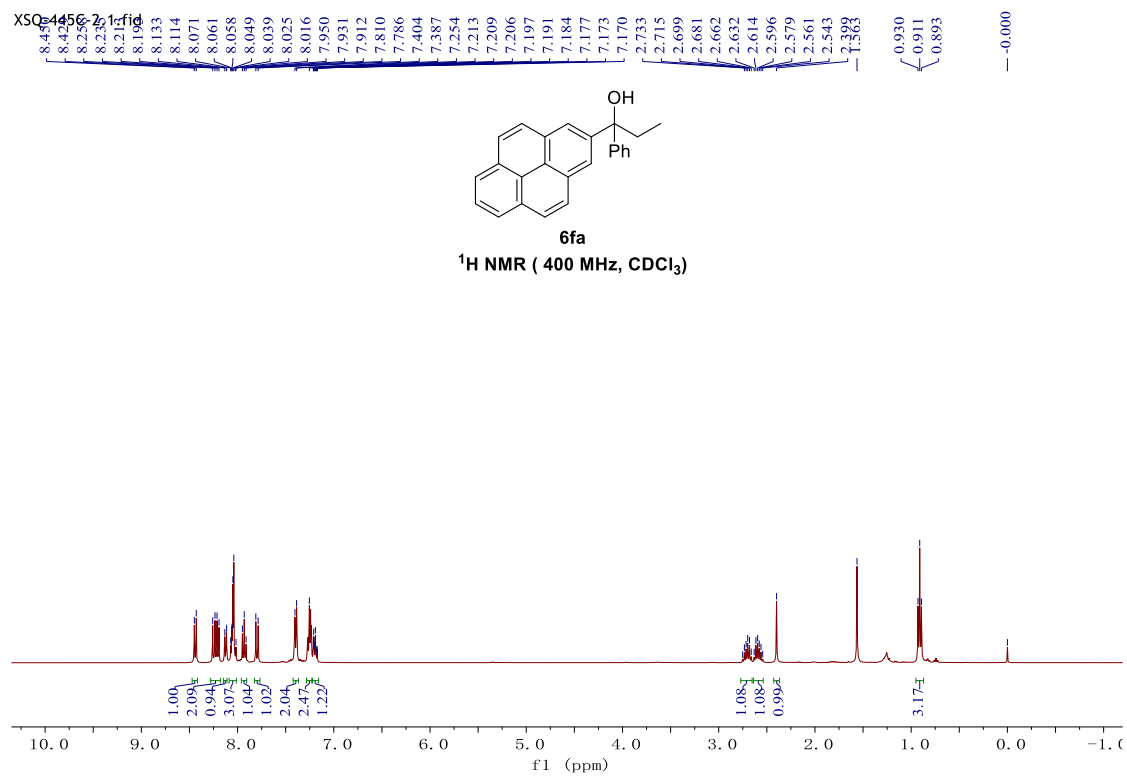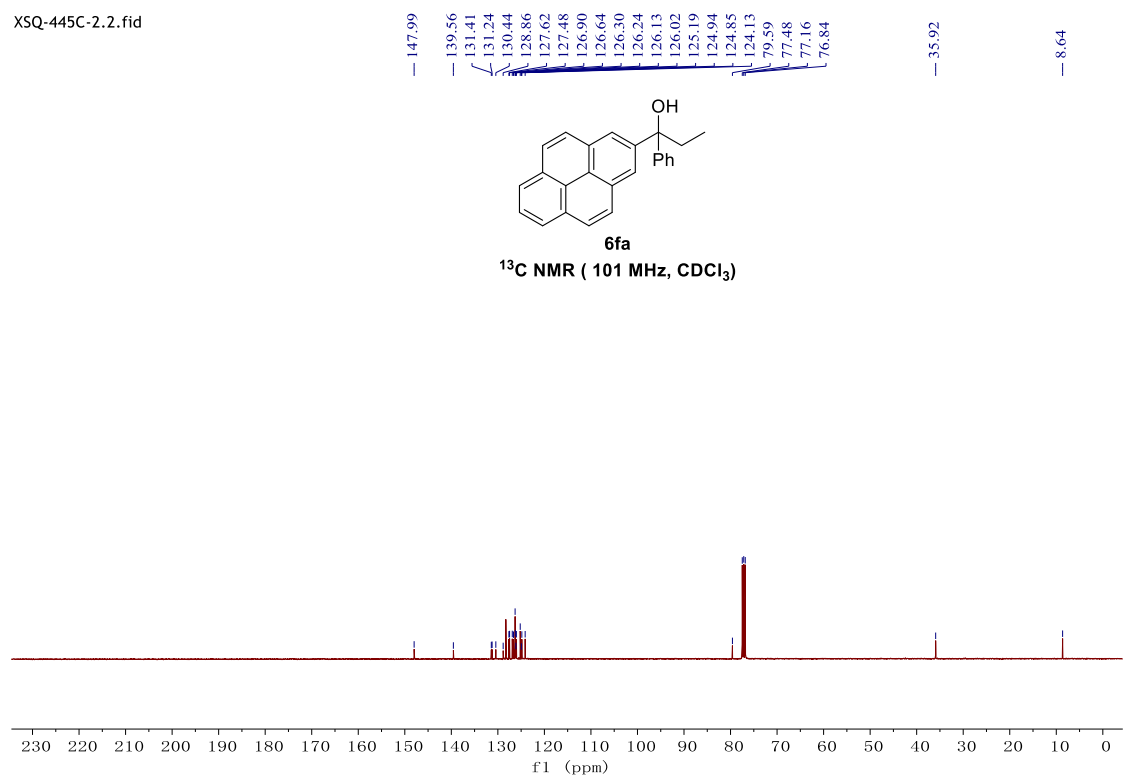

XSQ-1H.40.fid  
XSQ-426a

7.401  
7.399  
7.387  
7.385  
7.382  
7.373  
7.368  
7.362  
7.359  
7.328  
7.315  
7.301  
7.258  
7.242  
7.231  
7.218  
6.994  
6.980  
6.965

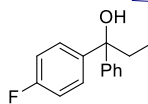

6ab

<sup>1</sup>H NMR ( 600 MHz, CDCl<sub>3</sub>)

2.329  
2.317  
2.314  
2.305  
2.302  
2.293  
2.290  
2.280  
2.278  
2.266  
2.052  
1.572  
0.886  
0.874  
0.862  
0.002  
-0.000

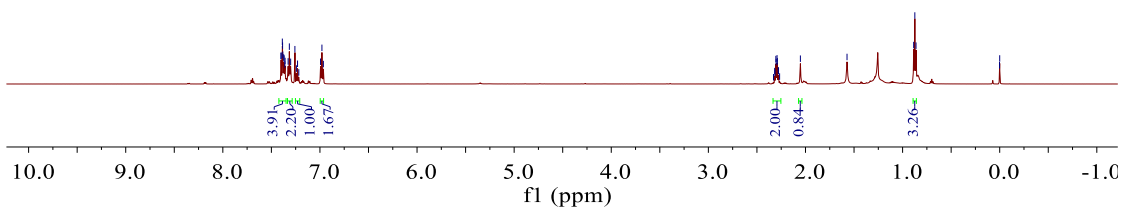

XSQ-13C.13.fid  
XSQ-426A-2

162.60  
160.97  
146.89  
142.89  
142.87  
128.35  
128.03  
127.98  
127.07  
126.19  
115.02  
114.88

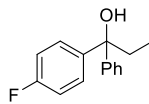

6ab

<sup>13</sup>C NMR ( 151 MHz, CDCl<sub>3</sub>)

78.30  
77.37  
77.16  
76.95  
34.74  
8.24

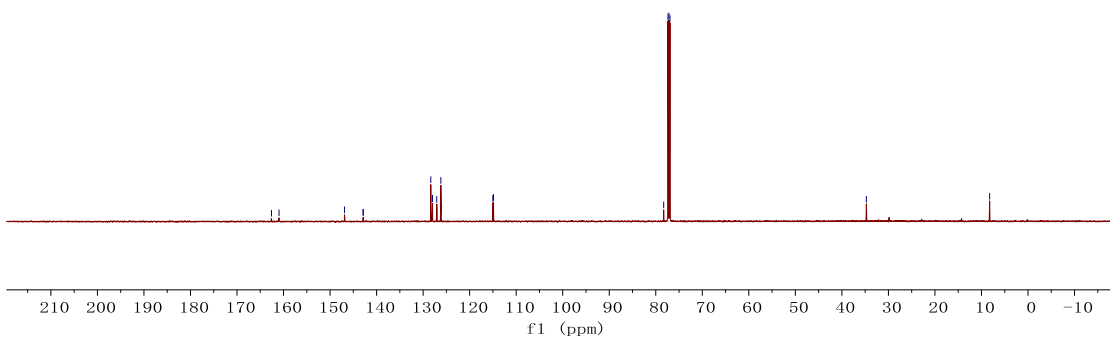

XSQ-19F.2.fid  
XSQ-426a

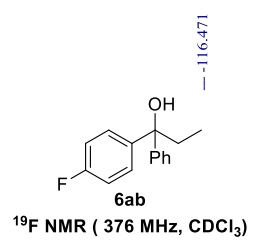

-116.471

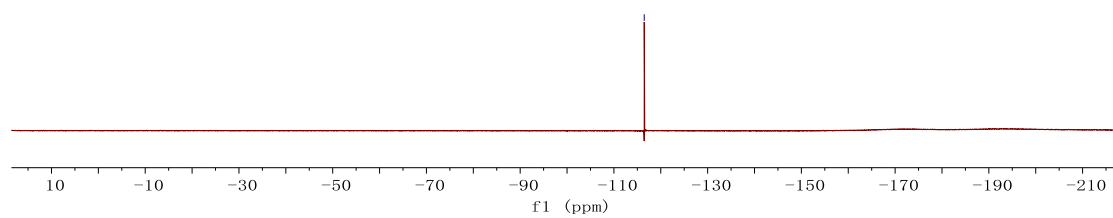

XSQ-438C-2.1.fid

7.411  
7.397  
7.392  
7.315  
7.309  
7.302  
7.296  
7.282  
7.276  
7.253  
7.226  
7.222  
7.204  
7.198  
7.186  
7.182  
7.123  
7.103

2.327  
2.312  
2.290  
2.272  
2.042  
1.566  
1.258  
0.893  
0.875  
0.857

— 0.000

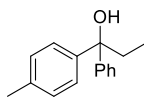

**6ac**

<sup>1</sup>H NMR (400 MHz, CDCl<sub>3</sub>)

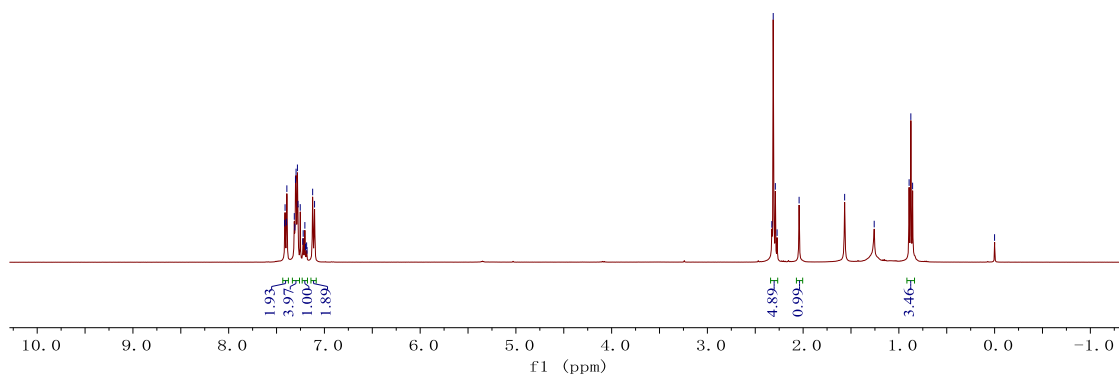

XSQ-438C-2.2.fid

147.21  
144.23  
136.50  
128.96  
128.20  
126.79  
126.21  
126.19

78.51  
77.48  
77.16  
76.84

— 34.62

— 21.11

— 8.33

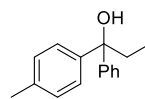

**6ac**

<sup>13</sup>C NMR (101 MHz, CDCl<sub>3</sub>)

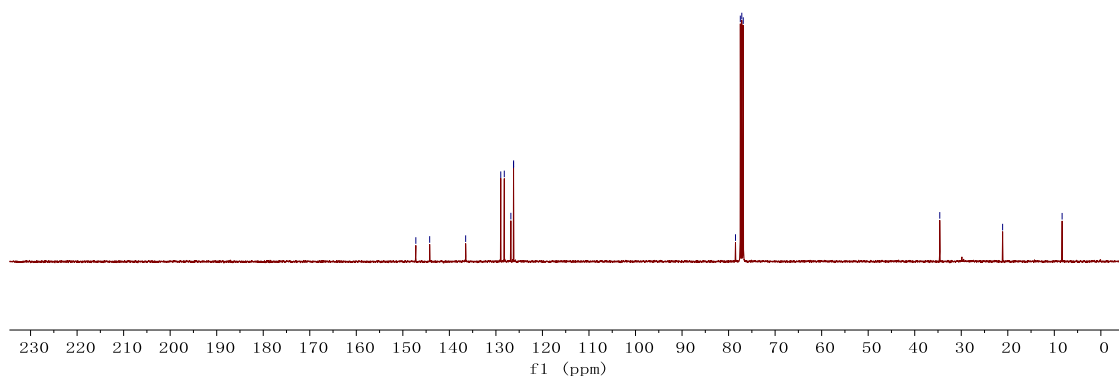

XSQ-1H.46.fid  
XSQ-431b

7.502  
7.490  
7.298  
7.285  
7.272  
7.259  
7.178  
7.166  
7.153

2.915  
2.903  
2.892  
2.881  
2.870

— 2.035

— 1.556

0.897  
0.885

— 0.000

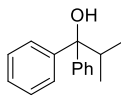

**6ad**

<sup>1</sup>H NMR (600 MHz, CDCl<sub>3</sub>)

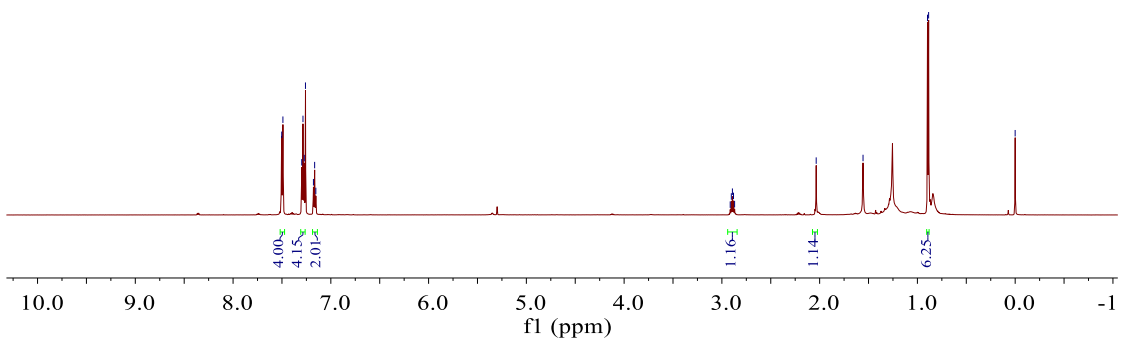

XSQ-13C.8.fid  
XSQ-431b

— 146.85

128.23  
126.49  
125.84

80.60  
77.37  
77.16  
76.95

— 35.20

— 17.33

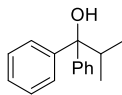

**6ad**

<sup>13</sup>C NMR (151 MHz, CDCl<sub>3</sub>)

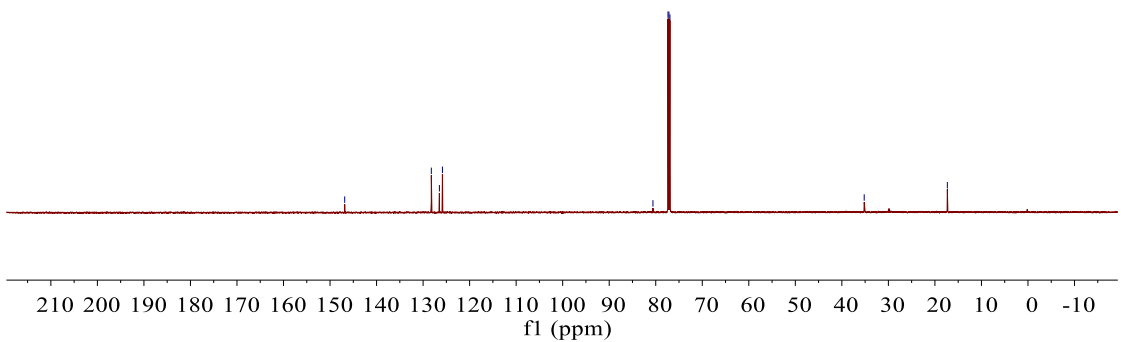

XSQ-1H.69.fid  
XSQ-435b-1

7.459  
7.446  
7.339  
7.327  
7.314  
7.277  
7.264  
7.252  
7.238  
7.225  
7.185  
7.172  
7.160  
7.148

2.606

2.149

-0.001

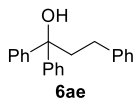

<sup>1</sup>H NMR ( 600 MHz, CDCl<sub>3</sub>)

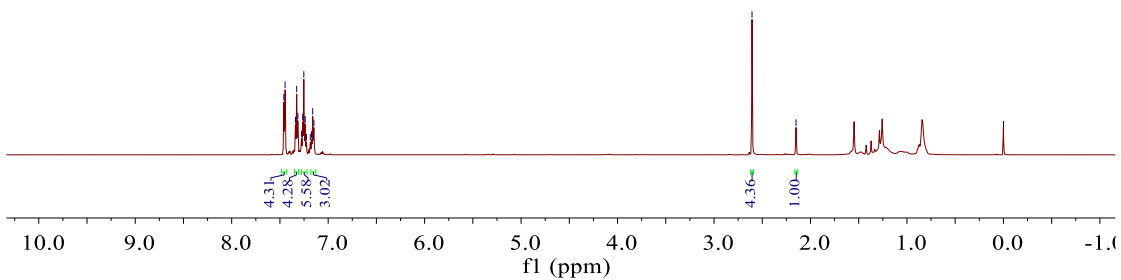

XSQ-13C.10.fid  
XSQ-435B

146.93  
142.47  
128.57  
128.53  
128.39  
127.08  
126.14  
125.97

78.37  
77.37  
77.16  
76.95

44.14

30.42

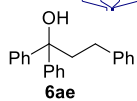

<sup>13</sup>C NMR ( 151 MHz, CDCl<sub>3</sub>)

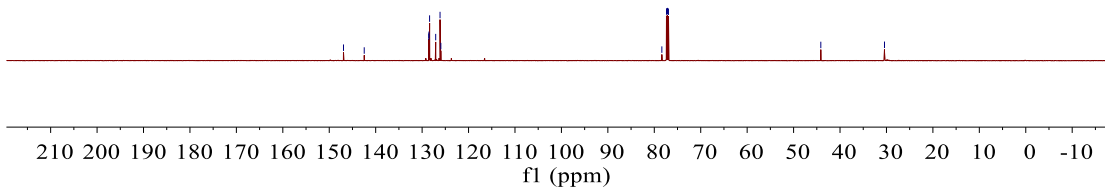

XSQ-1H.51.fid  
XSQ-437b-2

7.446  
7.434  
7.336  
7.323  
7.311  
7.289  
7.286  
7.258  
7.249  
7.237  
7.224  
7.224  
6.264  
6.261  
6.259  
6.255  
5.964  
5.959

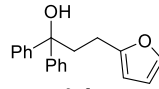

6af

<sup>1</sup>H NMR ( 600 MHz, CDCl<sub>3</sub>)

2.639  
2.151  
1.556  
-0.000

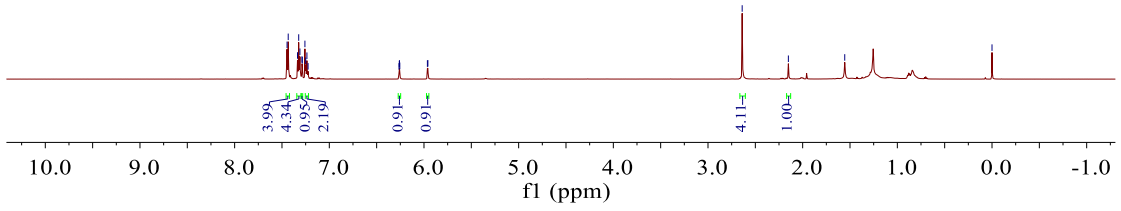

XSQ-13C.13.fid  
XSQ-437C

156.06  
146.69  
141.06  
128.41  
127.15  
126.15

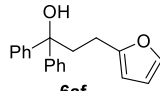

6af

<sup>13</sup>C NMR ( 151 MHz, CDCl<sub>3</sub>)

110.28  
104.86  
78.08  
77.37  
77.16  
76.95

22.97

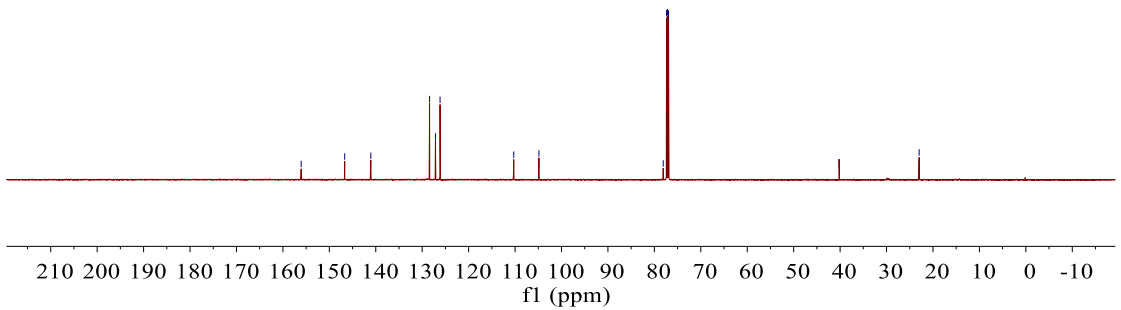

Supplement: d4qo00482e1.pdf [file d4qo00482e1.pdf]
